# Supplementary material for: イムディア-Hem Sp試薬の人血検査への応用
Source: Royal Society of Chemistry journal article supplement (doi:10.1039/d4sc02533d), 1988-11-01

## Supporting Information

### Hydroxyl carboxylate anion catalyzed depolymerization of biopolyesters and transformation to chemicals

Yanfei Zhao,<sup>[a,c]</sup> Hui Zhang<sup>[a,c]</sup>, Fengtian Wu<sup>[a,b]\*</sup>, Rongxiang Li<sup>[a,c]</sup>, Minhao Tang<sup>[a,c]</sup>, Yusi Wang<sup>[a,c]</sup>, Wei Zeng<sup>[a,c]</sup>, Buxing Han<sup>[a,c]</sup>, Zhimin Liu<sup>\*[a,c]</sup>

[a] Beijing National Laboratory for Molecular Sciences, Key Laboratory of Colloid and Interface and Thermodynamics Department, CAS Research/Education Center for Excellence in Molecular Sciences, Center for Carbon Neutral Chemistry, Institute of Chemistry, Chinese Academy of Sciences, Beijing 100190, China

E-mail: wufengtian123@126.com, liuzm@iccas.ac.cn

[b] Jiangxi Province Key Laboratory of Polymer Micro/Nano Manufacturing and Devices, Jiangxi Province Key Laboratory of Synthetic Chemistry, East China University of Technology, Economic Development Zone, Guanglan Avenue 418, Nanchang 330013, China.

[c] University of Chinese Academy of Sciences, Beijing 100049, China.

## Experimental section

### Materials

Polyglycolic acid (PGA, granule,  $M_n \sim 150,000$ ), polylactic acid (PLA, particle,  $M_w \sim 80,000$ ), poly( $\beta$ -hydroxybutyrate) (PHB, powder,  $\geq 98\%$ ) were purchased from Macklin Biochemical Co., Ltd. The ILs including [EMIm][Cl] (99%), [BMIm][Cl] (99%) and [HMIm][Cl] (99%), were provided by Centre of Green Chemistry and Catalysis, Lanzhou Institute of Chemical Physics (LICP), Chinese Academy of Sciences (CAS). Ion exchange resin (Ambersep|r HPR900 OH), glycolic acid (99%), lactic acid (85%), 3-hydroxybutyric acid (95%), tetrabutylphosphonium bromide (99%), 1,8-diazabicyclo[5.4.0]undec-7-ene (DBU, 98%) were purchased from J&K Scientific Co., Ltd. 2-Aminothiophenol (97%), *o*-phenylenediamine (98%), hydrazine monohydrate (98%) and various substrates of amines, were commercially available from Beijing Innochem Science & Technology CO., Ltd. The other chemicals were purchased from Beijing Chemical Company. All chemicals were of analytical grade and used as received.

### General procedure for annulation of 2-aminothiophenol with PGA-derived ionic intermediate

In a typical experiment, [EMIm][Gac-CH<sub>2</sub>COO<sup>-</sup>] (1 mmol) and 2-aminothiophenol (1.5 mmol) were sequentially loaded into a 10 mL flask and sealed under the nitrogen atmosphere equipped with a magnetic stirrer. The reaction mixture was stirred at the desired temperature (e.g., 60°C) for 24 h. After the reaction, the reactor was cooled down in ice water. The quantitative analysis was conducted by <sup>1</sup>H NMR analysis using ultra-dry dimethylformamide as an internal standard.

### General procedures for decomposition of PGA surgical suture lines using *o*-phenylenediamine

In a typical experiment, PGA surgical suture lines (116 mg), *o*-phenylenediamine (4 mmol) and [EMIm][Gac] (4 mmol) were sequentially loaded into a 10 mL flask and sealed under the nitrogen atmosphere equipped with a magnetic stirrer. The reaction mixture was stirred at 110 °C for 24 h. After the reaction, the reactor was cooled down in ice water. The reaction mixture was extracted with 3 ml of ethyl acetate for three times, and [EMIm][Gac] was used directly for the next run after removing solvent by rotary evaporation and drying in a vacuum oven at 343 K for 24 h. The combined ethyl acetate solutions were washed with water and brine, followed by treatment with anhydrous Na<sub>2</sub>SO<sub>4</sub>, and evaporated to remove ethyl acetate. Then, the obtained residue was purified by flash column chromatography on silica gel to yield the desired 3b.

## NMR measurements

NMR spectra were recorded on Bruker Avance III 400 HD or 500 WB spectrometer equipped with 5 mm pulsed-field-gradient (PFG) probes. Chemical shifts are given in ppm relative to tetramethylsilane.

For  $^1\text{H}$  and  $^{13}\text{C}$  analysis, pure products were dissolved in  $\text{DMSO-}d_6$  and were recorded on Bruker Avance III 400 HD or 500 WB.

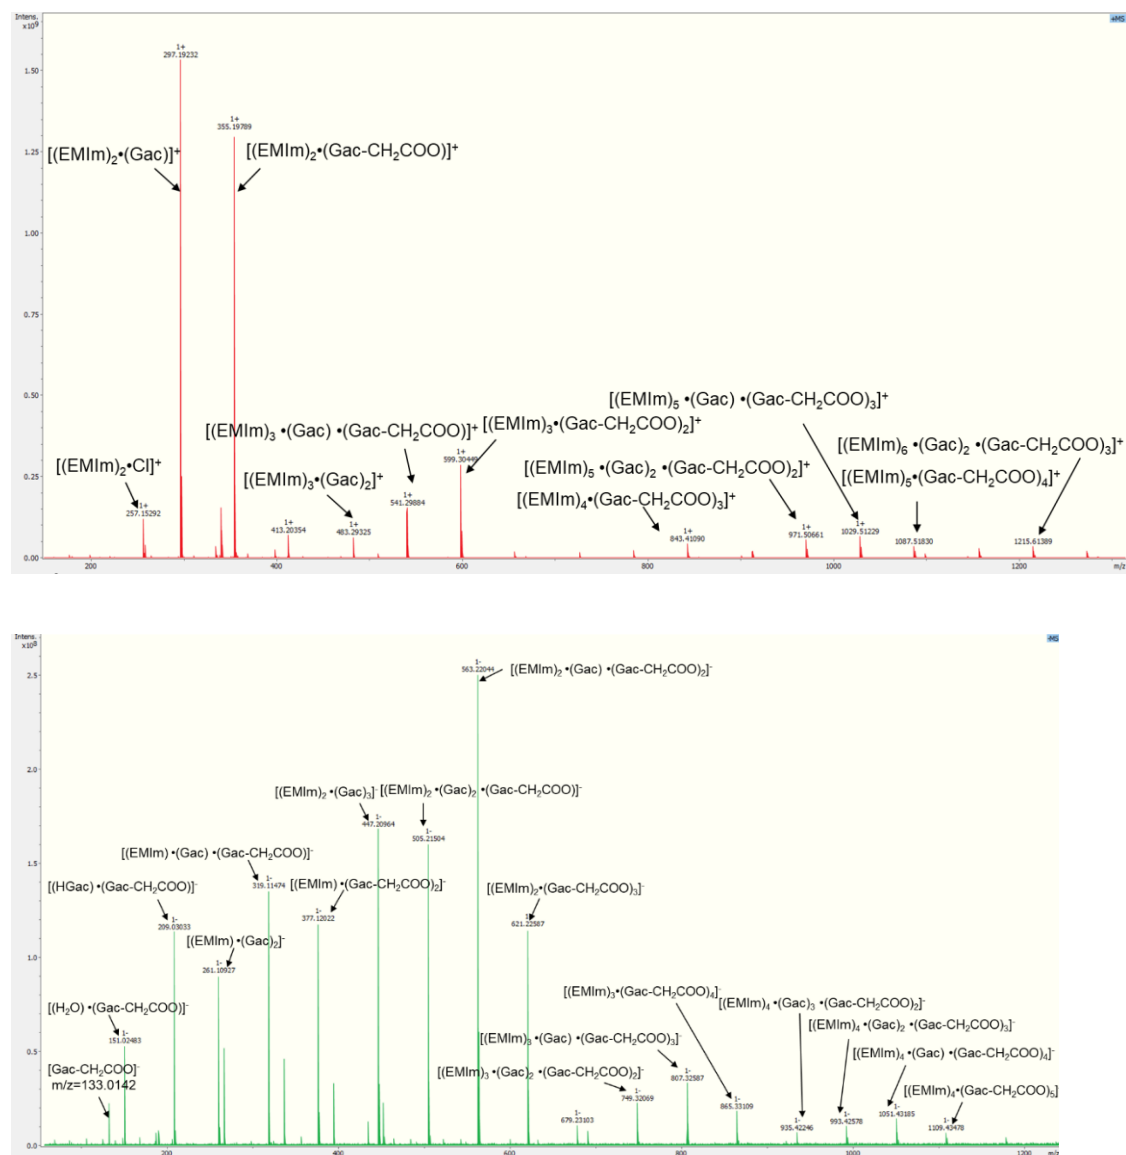

Figure S1. HR-ESI-MS spectra the reaction solution. Reaction conditions: PGA (58 mg),  $[\text{EMIm}][\text{Gac}]$  (2 mmol), 110 °C, 15h. (a) ESI-MS (+); (b) ESI-MS (-).

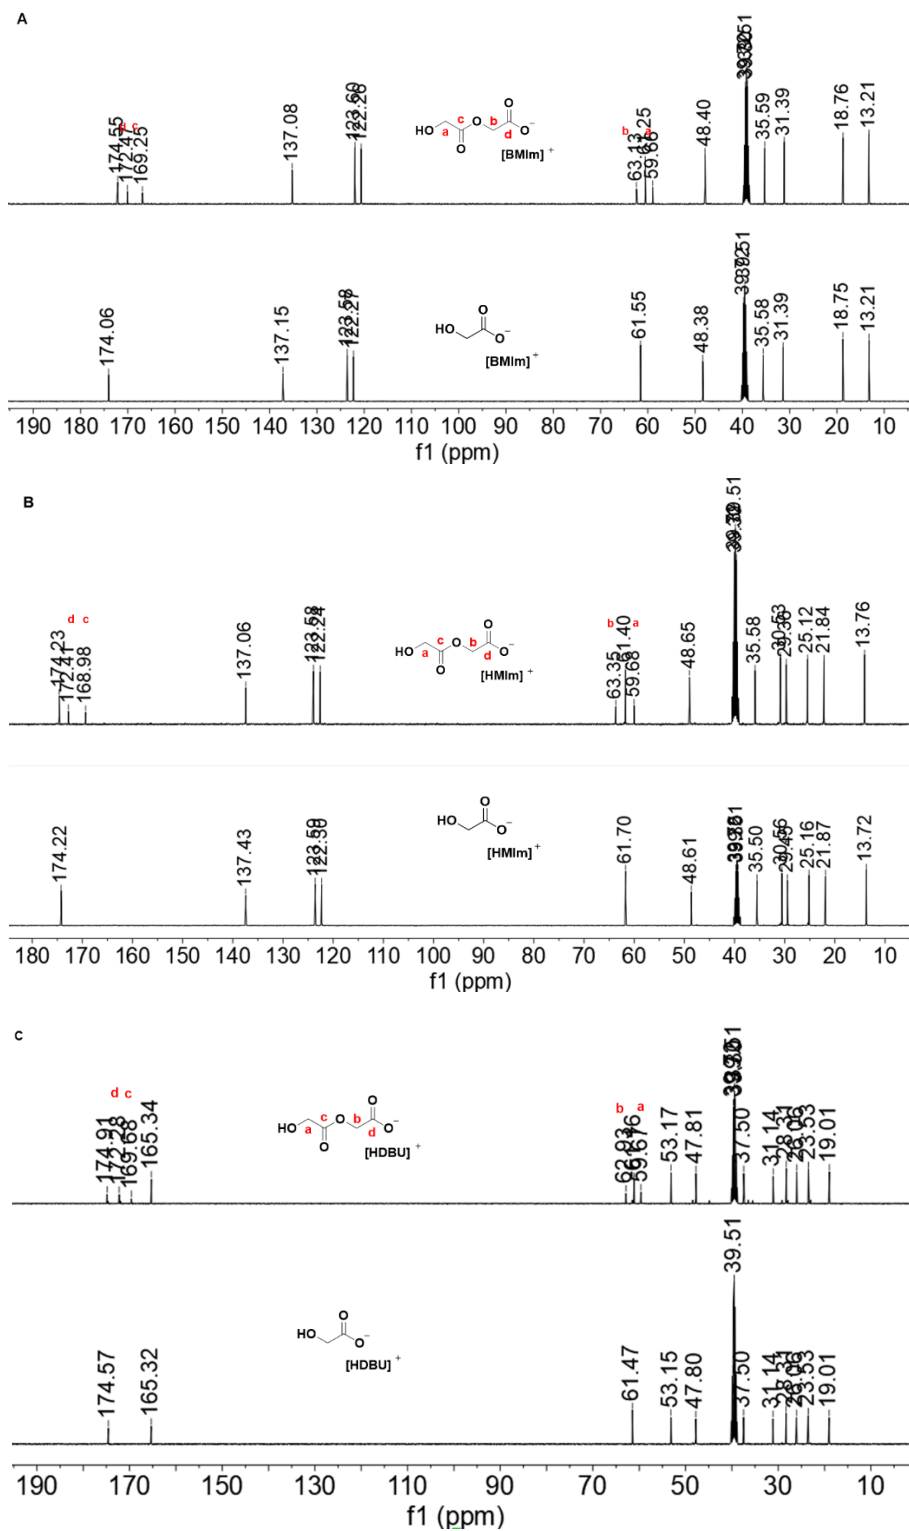

Figure S2  $^{13}\text{C}$  NMR spectra of PGA before and after exposed to (A) [BMIm][Gac], (B) [HMIm][Gac], and (C) [HDBU][Gac] at 110 °C

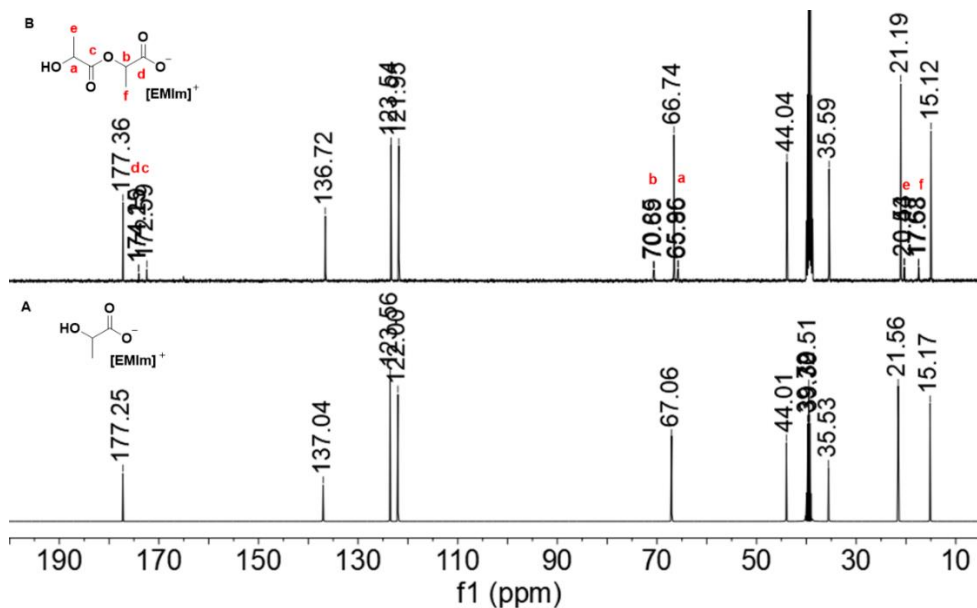

Figure S3  $^{13}\text{C}$  NMR spectra of PLA before (A) and after (B) exposed to  $[\text{EMIm}][\text{Lac}]$  at  $110\text{ }^\circ\text{C}$ .

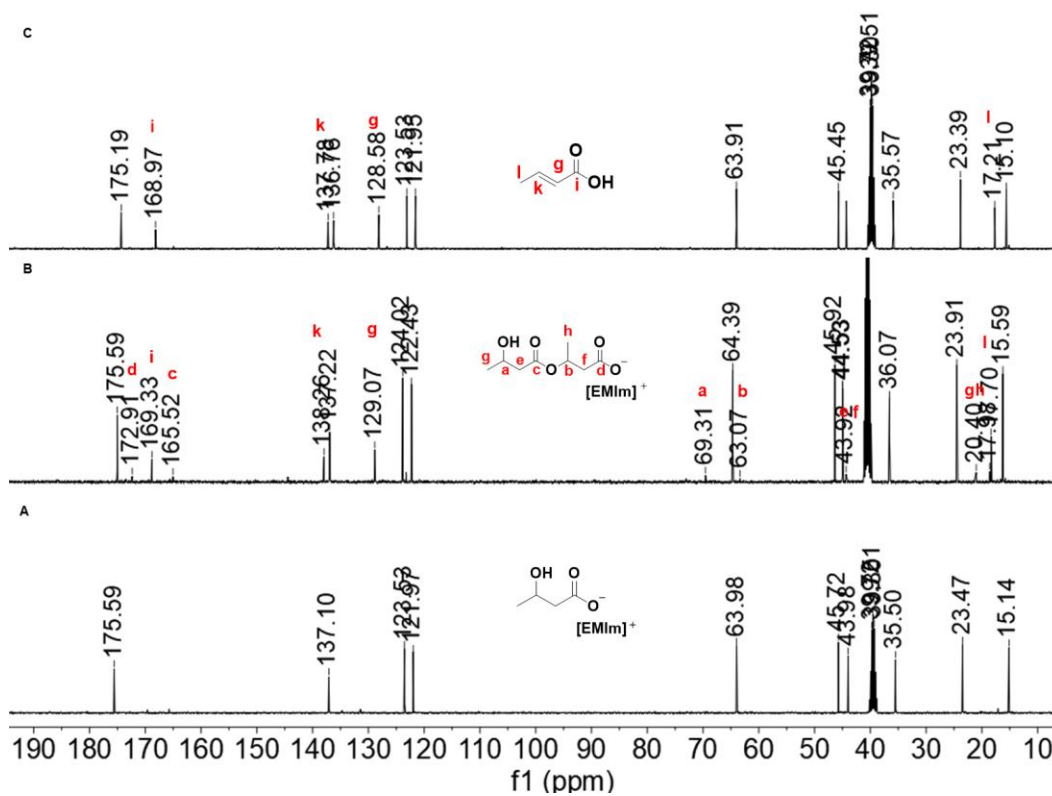

Figure S4  $^{13}\text{C}$  NMR spectra of PHB before (A) and after exposed to  $[\text{EMIm}][\text{Hb}]$  at  $110\text{ }^\circ\text{C}$  for 5h (B) and 12 h (C).

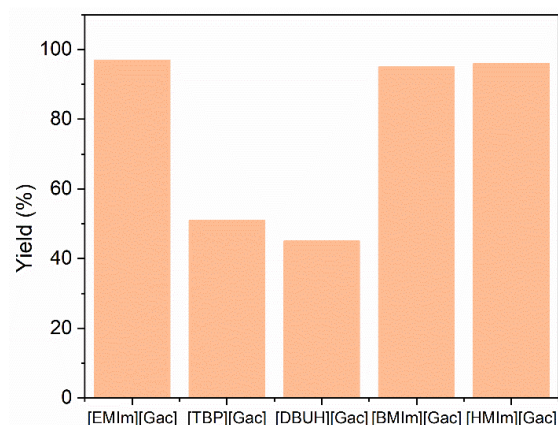

Figure S5. The effect of ionic liquids on the yield of glycolic acid after water was added into the [Gac-CH<sub>2</sub>COO]<sup>-</sup>-based solutions.

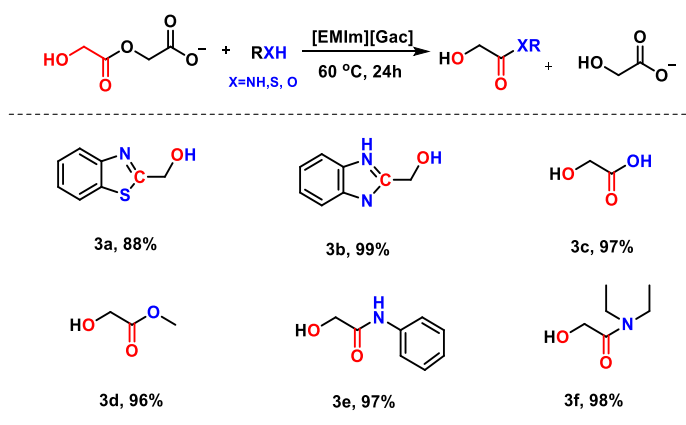

Scheme S1 The reaction of [EMIm][Gac-CH<sub>2</sub>COO] with different nucleophiles including water, methanol and amines.

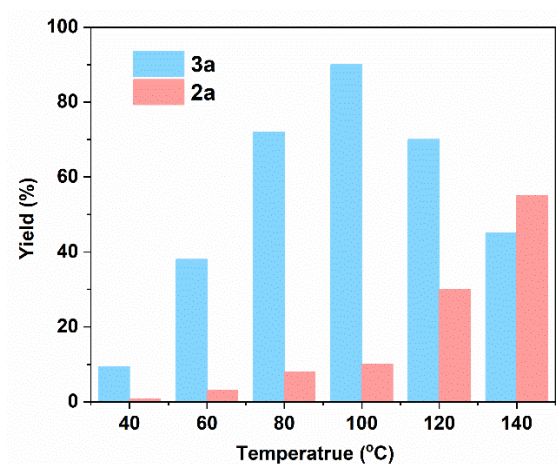

Figure S6. Selective synthesis of 2H-1,4-benzothiazin-3-one (2a) and 1,3-benzothiazol-2-ylmethanol (3a) from [EMIm][Gac-CH<sub>2</sub>COO] and 2-aminothiophenol (1a) at different temperature.

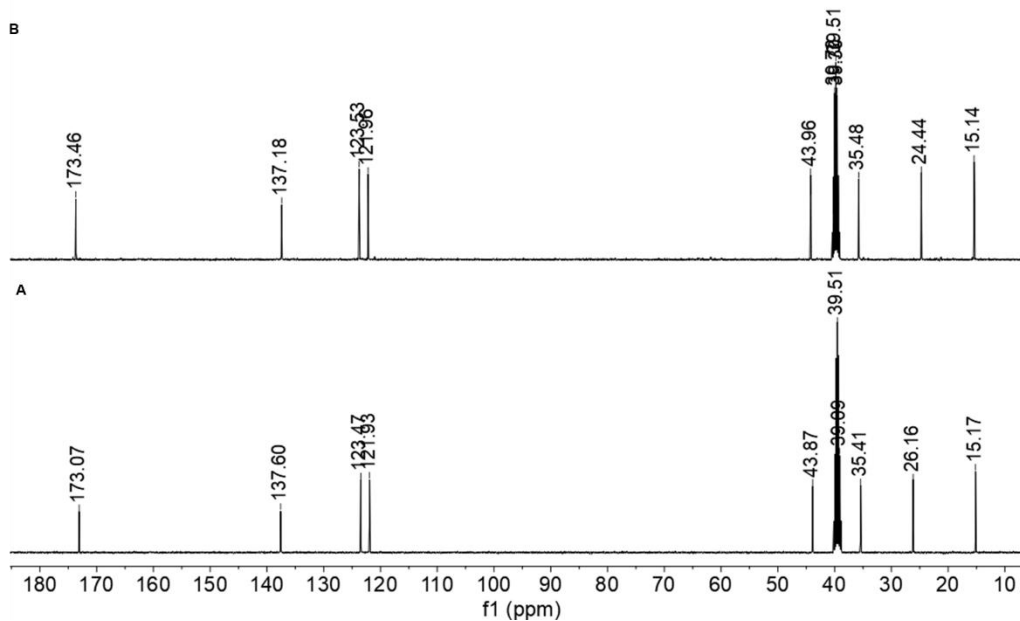

Figure S7  $^{13}\text{C}$  NMR spectra of PGA before(A) and after(B) exposed to  $[\text{EMIm}][\text{Oac}]$  at  $110^\circ\text{C}$  for 15 h

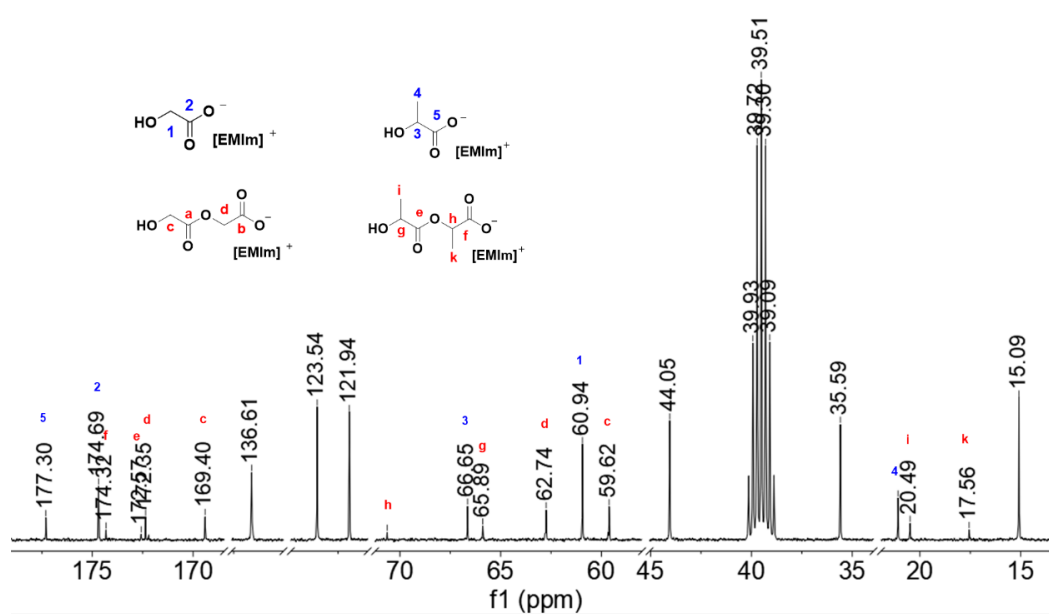

Figure S8  $^{13}\text{C}$  NMR spectra of PLGA after exposed to  $[\text{EMIm}][\text{Gac}]$  at  $110^\circ\text{C}$  for 15 h

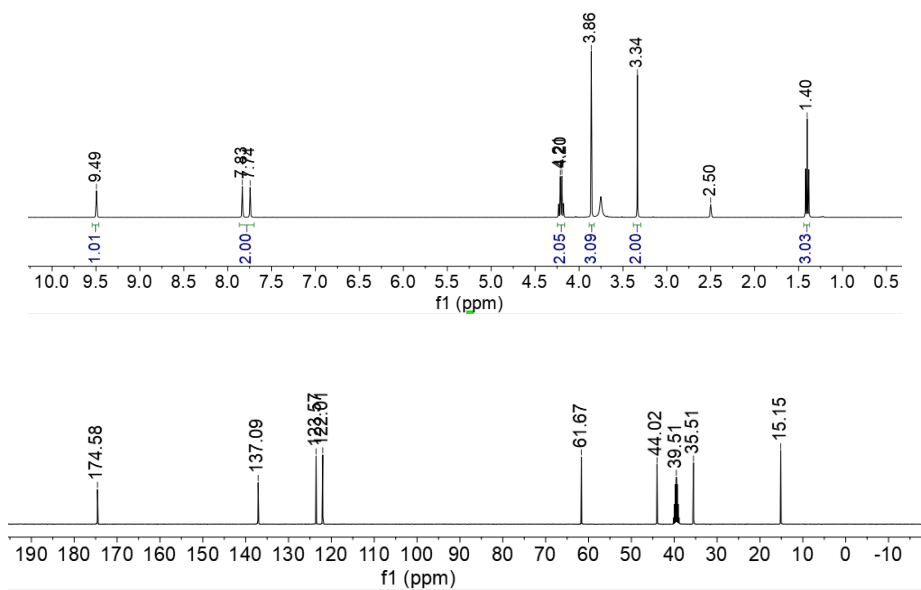

Figure S9  $^1\text{H}$  and  $^{13}\text{C}$  NMR spectra of [EMIm][Gac]

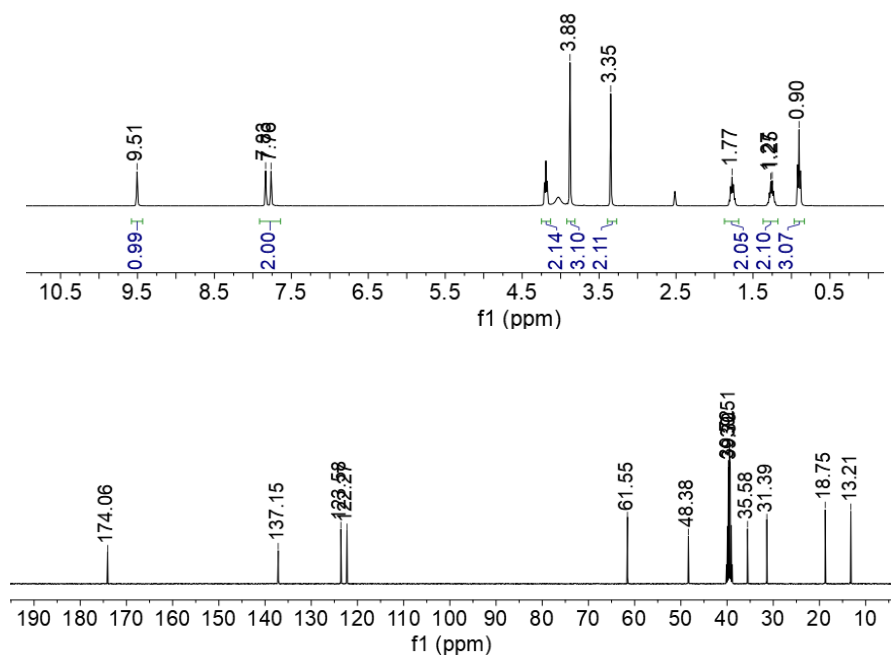

Figure S10  $^1\text{H}$  and  $^{13}\text{C}$  NMR spectra of [BMIm][Gac]



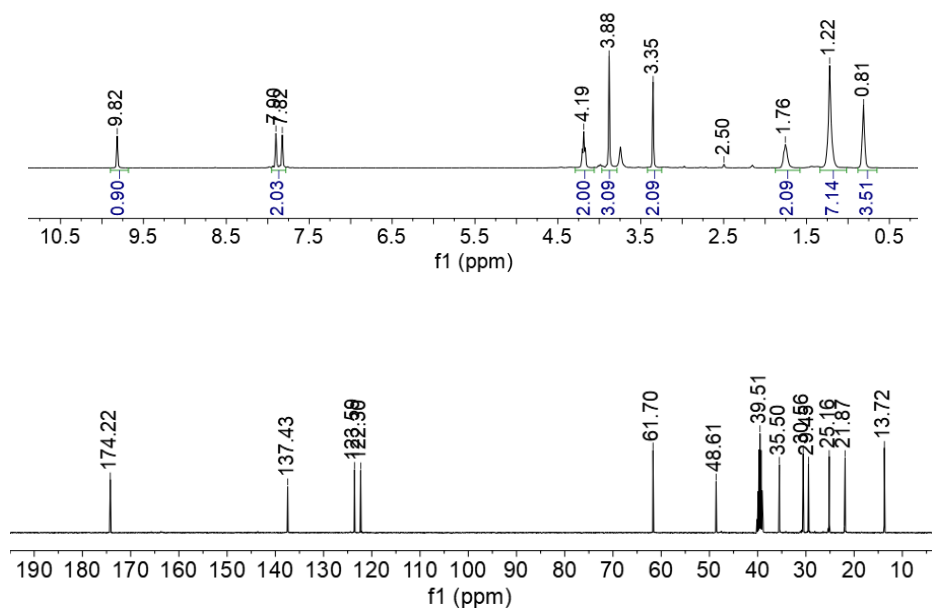

Figure S11  $^1\text{H}$  and  $^{13}\text{C}$  NMR spectra of [HMIm][Gac]

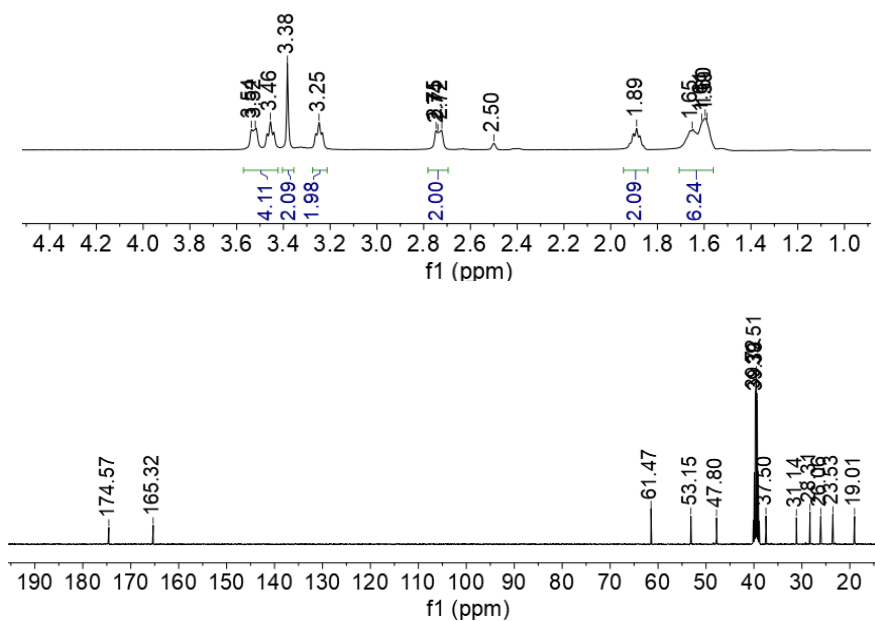

Figure S12  $^1\text{H}$  and  $^{13}\text{C}$  NMR spectra of [HDBU][Gac]

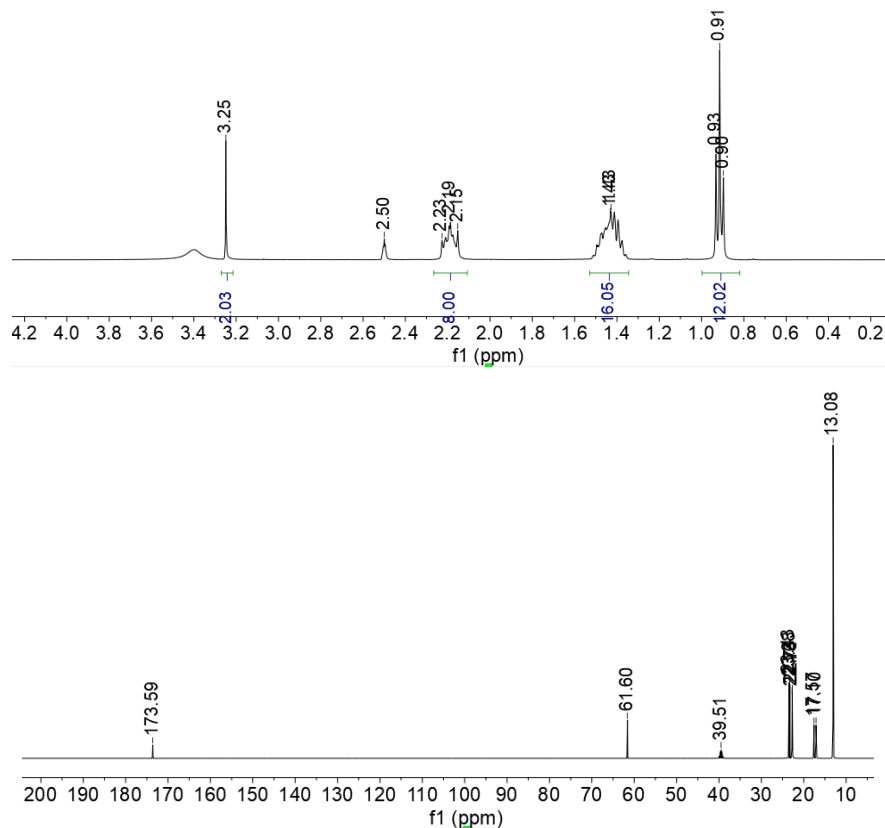

Figure S13  $^1\text{H}$  and  $^{13}\text{C}$  NMR spectra of [TBP][Gac]

### 2H-1,4-Benzothiazin-3-one (2a)

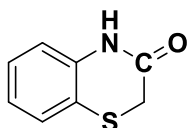

$^1\text{H}$  NMR (400 MHz,  $\text{DMSO-}d_6$ , 25 °C):  $\delta$  = 10.56 (s, 1H), 7.31-7.33 (m, 1H), 7.16-7.20 (m, 1H), 6.96-6.99 (m, 2H), 3.46 ppm (s, 2H);  $^{13}\text{C}$  NMR (101 MHz,  $\text{DMSO-}d_6$ , 25 °C):  $\delta$  = 165.6, 137.9, 127.7, 127.3, 123.3, 119.5, 117.6, 29.4 ppm.

### 1,3-Benzothiazol-2-ylmethanol (3a)

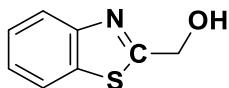

$^1\text{H}$  NMR (400 MHz,  $\text{DMSO-}d_6$ , 25 °C):  $\delta$  = 8.08-8.10 (m, 1H), 7.92-7.94 (m, 1H), 7.48-7.51 (m, 1H), 7.39-7.43 (m, 1H), 6.25 (t,  $J$  = 6.0 Hz, 1H), 4.88 ppm (d,  $J$  = 6.0 Hz, 2H);  $^{13}\text{C}$  NMR (101 MHz,  $\text{DMSO-}d_6$ , 25 °C):  $\delta$  = 175.6, 153.1, 134.3, 126.0, 124.6, 122.3, 122.2, 61.3 ppm.

### 2-(Hydroxymethyl)benzimidazole (3b)

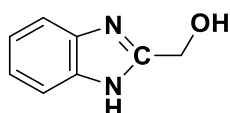

$^1\text{H}$  NMR (400 MHz, DMSO- $d_6$ , 25 °C):  $\delta$  = 12.32 (s, 1H), 7.49-7.52 (m, 2H), 7.13-7.15 (m, 2H), 5.71 (t,  $J$  = 5.6 Hz, 1H), 4.70 ppm (d,  $J$  = 5.6 Hz, 2H);  $^{13}\text{C}$  NMR (101 MHz, DMSO- $d_6$ , 25 °C):  $\delta$  = 155.5, 143.6, 134.7, 122.0, 121.5, 118.9, 111.7, 58.2 ppm.

### Glycolic acid (3c)

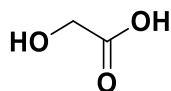

$^1\text{H}$  NMR (400 MHz, DMSO- $d_6$ , 25 °C):  $\delta$  = 12.26 (s, 1H), 5.16 (s, 1H), 3.91 ppm (s, 2H);  $^{13}\text{C}$  NMR (101 MHz, DMSO- $d_6$ , 25 °C):  $\delta$  = 174.7, 60.0 ppm.

### Glycolic acid methyl ester (3d)

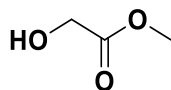

$^1\text{H}$  NMR (400 MHz, DMSO- $d_6$ , 25 °C):  $\delta$  = 5.30 (t,  $J$  = 6.4 Hz, 1H), 4.01 (d,  $J$  = 6.4 Hz, 1H), 3.64 ppm (s, 2H);  $^{13}\text{C}$  NMR (101 MHz, DMSO- $d_6$ , 25 °C):  $\delta$  = 174.7, 60.0 ppm.

### Glycolanilide (3e)

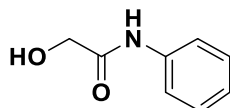

$^1\text{H}$  NMR (400 MHz, DMSO- $d_6$ , 25 °C):  $\delta$  = 9.66 (s, 1H), 7.69-7.72 (m, 2H), 7.28-7.33 (m, 2H), 7.03-7.08 (m, 1H), 5.69 (t,  $J$  = 7.2 Hz, 1H), 4.00 ppm (d,  $J$  = 7.2 Hz, 2H);  $^{13}\text{C}$  NMR (101 MHz, DMSO- $d_6$ , 25 °C):  $\delta$  = 171.3, 139.0, 129.1, 123.9, 120.1, 62.4 ppm.

### N, N-Diethyl-2-hydroxyacetamide (3f)

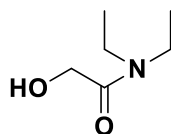

$^1\text{H}$  NMR (400 MHz, DMSO- $d_6$ , 25 °C):  $\delta$  = 4.37 (t,  $J$  = 7.2 Hz, 1H), 4.05 (d,  $J$  = 7.2 Hz, 2H), 3.26-3.33 (m, 2H), 3.16-3.23 (m, 2H), 1.01-1.11 ppm (m, 6H);  $^{13}\text{C}$  NMR (101 MHz, DMSO- $d_6$ , 25 °C):  $\delta$  = 170.9, 60.1, 14.3, 13.3 ppm.

### 1-(Benzo[d]thiazol-2-yl)ethan-1-ol (3g)

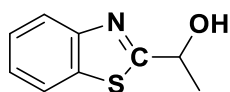

$^1\text{H}$  NMR (400 MHz, DMSO- $d_6$ , 25 °C):  $\delta$  = 8.07-8.10 (m, 2H), 7.41-7.49 (m, 2H), 6.34-6.39

(m, 1H), 5.09-5.10 (m, 1H), 1.55-1.60 ppm (m, 3H);  $^{13}\text{C}$  NMR (101 MHz,  $\text{DMSO-}d_6$ , 25 °C):  $\delta$  = 180.0, 153.7, 134.9, 126.4, 125.1, 122.8, 122.7, 67.6, 24.3 ppm.

### 1-Benzimidazol-2-ylethanol (3h)

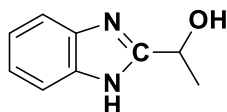

$^1\text{H}$  NMR (400 MHz,  $\text{DMSO-}d_6$ , 25 °C):  $\delta$  = 12.26 (s, 1H), 7.53-7.55 (m, 2H), 7.12-7.14 (m, 2H), 5.80 (d,  $J$  = 6.4 Hz, 1H), 4.90-4.98 (m, 1H), 1.51 ppm (d,  $J$  = 8.8 Hz, 3H);  $^{13}\text{C}$  NMR (101 MHz,  $\text{DMSO-}d_6$ , 25 °C):  $\delta$  = 159.0, 143.6, 134.6, 122.0, 121.3, 118.9, 111.7, 64.2, 23.4 ppm.

### Lactanilide (3i)

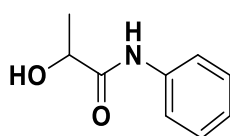

$^1\text{H}$  NMR (400 MHz,  $\text{DMSO-}d_6$ , 25 °C):  $\delta$  = 9.62 (s, 1H), 7.70-7.72 (m, 2H), 7.27-7.33 (m, 2H), 7.03-7.08 (m, 1H), 5.73-5.75 (m, 1H), 4.10-4.19 (m, 1H), 1.31 ppm (d,  $J$  = 9.2 Hz, 3H);  $^{13}\text{C}$  NMR (101 MHz,  $\text{DMSO-}d_6$ , 25 °C):  $\delta$  = 174.0, 139.1, 129.1, 123.8, 120.0, 68.2, 21.4 ppm.

### Lactic acid (3j)

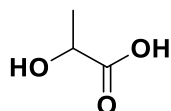

$^1\text{H}$  NMR (400 MHz,  $\text{DMSO-}d_6$ , 25 °C):  $\delta$  = 4.03 (q,  $J$  = 9.2 Hz, 1H), 1.22 ppm (d,  $J$  = 9.2 Hz, 3H);  $^{13}\text{C}$  NMR (101 MHz,  $\text{DMSO-}d_6$ , 25 °C):  $\delta$  = 177.0, 66.2, 20.1 ppm.

### Methyl lactate (3k)

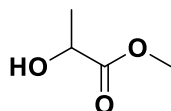

$^1\text{H}$  NMR (400 MHz,  $\text{DMSO-}d_6$ , 25 °C):  $\delta$  = 5.35 (d,  $J$  = 8.4 Hz, 1H), 4.10-4.19 (m, 1H), 3.63 (s, 3H), 1.24 ppm (d,  $J$  = 9.2 Hz, 3H);  $^{13}\text{C}$  NMR (101 MHz,  $\text{DMSO-}d_6$ , 25 °C):  $\delta$  = 175.4, 66.4, 51.7, 20.7 ppm.

### Ethyl lactate (3l)

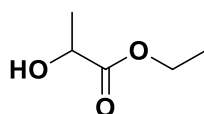

$^1\text{H}$  NMR (400 MHz,  $\text{DMSO-}d_6$ , 25 °C):  $\delta$  = 5.29 (d,  $J$  = 7.6 Hz, 1H), 4.05-4.15 (m, 3H), 1.17-1.25 ppm (m, 6H);  $^{13}\text{C}$  NMR (101 MHz,  $\text{DMSO-}d_6$ , 25 °C):  $\delta$  = 175.0, 66.4, 60.3, 20.7, 14.4 ppm.

### 2-Hydroxy-1-(pyrrolidin-1-yl)propan-1-one (3m)

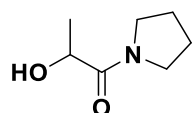

$^1\text{H}$  NMR (400 MHz, DMSO- $d_6$ , 25 °C):  $\delta$  = 4.78-4.80 (m, 1H), 4.20-4.29 (m, 1H), 3.51-3.59 (m, 1H), 3.22-3.41 (m, 3H), 1.71-1.91 (m, 4H), 1.16 ppm (d,  $J$  = 7.6 Hz, 3H);  $^{13}\text{C}$  NMR (101 MHz, DMSO- $d_6$ , 25 °C):  $\delta$  = 172.6, 65.7, 46.1, 45.9, 26.2, 23.9, 20.5 ppm.

### Methyl crotonate (3n)

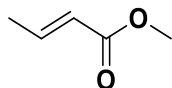

$^1\text{H}$  NMR (400 MHz, DMSO- $d_6$ , 25 °C):  $\delta$  = 6.86-6.95 (m, 1H), 5.88-5.92 (m, 1H), 3.64 (s, 3H), 1.85 ppm (d,  $J$  = 6.8 Hz, 3H);  $^{13}\text{C}$  NMR (101 MHz, DMSO- $d_6$ , 25 °C):  $\delta$  = 166.5, 145.6, 122.4, 51.5, 18.1 ppm.

### Ethyl crotonate (3o)

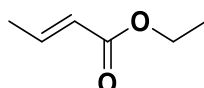

$^1\text{H}$  NMR (400 MHz, DMSO- $d_6$ , 25 °C):  $\delta$  = 6.85-6.94 (m, 1H), 5.85-5.90 (m, 1H), 4.08-4.13 (m, 2H), 1.84-1.86 (m, 3H), 1.19-1.22 ppm (m, 3H);  $^{13}\text{C}$  NMR (101 MHz, DMSO- $d_6$ , 25 °C):  $\delta$  = 166.0, 145.3, 122.8, 60.0, 18.0, 14.5 ppm.

### (2E)-N-Benzylbut-2-enamide (3p)

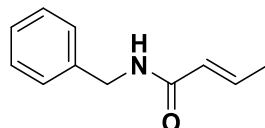

$^1\text{H}$  NMR (400 MHz, DMSO- $d_6$ , 25 °C):  $\delta$  = 8.41 (s, 1H), 7.22-7.35 (m, 5H), 6.61-6.73 (m, 1H), 5.95-6.01 (m, 1H), 4.33 (d,  $J$  = 8.0 Hz, 2H), 1.79-1.82 ppm (m, 3H);  $^{13}\text{C}$  NMR (101 MHz, DMSO- $d_6$ , 25 °C):  $\delta$  = 165.3, 140.1, 138.5, 128.8, 127.7, 127.2, 126.2, 42.5, 17.8 ppm.

### 4-Methyl-1,3,4,5-tetrahydro-2H-1,5-benzodiazepin-2-one (3q)

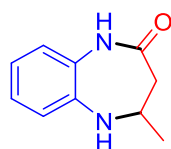

$^1\text{H}$  NMR (400 MHz, DMSO- $d_6$ , 25 °C):  $\delta$  = 9.43 (s, 1H), 6.83-6.87 (m, 3H), 6.68-6.73 (m, 1H), 5.27 (s, 1H), 3.82-3.84 (m, 1H), 2.41-2.47 (m, 1H), 2.17-2.41 (m, 1H), 1.18 ppm (d,  $J$  = 8.8 Hz, 3H);  $^{13}\text{C}$  NMR (101 MHz, DMSO- $d_6$ , 25 °C):  $\delta$  = 171.9, 139.8, 128.5, 124.9, 122.2, 120.7, 119.8, 53.5, 42.1, 23.7 ppm.

### 7-Fluoro-4-methyl-1,3,4,5-tetrahydro-2H-benzo[b][1,4]diazepin-2-one (3r)

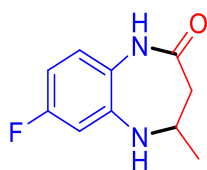

$^1\text{H}$  NMR (400 MHz, DMSO- $d_6$ , 25 °C):  $\delta$  = 9.55 (s, 1H), 9.43 (s, 0.5H), 6.60-6.89 (m, 5H), 6.45-6.52 (m, 1H), 5.65 (s, 0.6H), 5.17 (s, 1H), 3.80-3.84 (m, 2H), 2.42-2.47 (m, 1.5 H), 2.14-2.29 (m, 2H), 1.16-1.20 ppm (m, 5H);  $^{13}\text{C}$  NMR (101 MHz, DMSO- $d_6$ , 25 °C):  $\delta$  = 172.2, 136.4, 130.6, 121.9 ( $J_{\text{C-F}}$  = 12.0 Hz), 111.2, 110.9, 108.5, 108.2, 54.3, 41.8, 23.4 ppm;  $^{19}\text{F}$  NMR (400 MHz, DMSO- $d_6$ , 25 °C):  $\delta$  = -119.3 ppm.

### 7-Chloro-4-methyl-1,3,4,5-tetrahydro-2H-benzo[b][1,4]diazepin-2-one (3s)

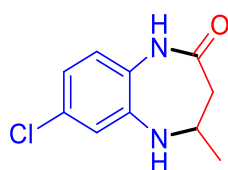

$^1\text{H}$  NMR (400 MHz, DMSO- $d_6$ , 25 °C):  $\delta$  = 9.59 (d,  $J$  = 9.2 Hz, 1H), 6.87-6.98 (m, 5H), 6.74-6.77 (m, 1H), 5.71 (s, 1 H), 5.58 (s, 1H), 3.84-3.90 (m, 2H), 2.50-2.51 (m, 1 H), 2.27-2.36 (m, 2H), 1.23-1.29 ppm (m, 6H);  $^{13}\text{C}$  NMR (101 MHz, DMSO- $d_6$ , 25 °C):  $\delta$  = 171.9, 171.7, 141.1, 138.8, 129.2, 128.3, 126.5, 124.3, 123.5, 122.6, 121.6, 121.3, 119.1, 118.6, 52.9, 52.6, 42.4, 23.7, 23.6 ppm.

### 7-Bromo -4-methyl-1,3,4,5-tetrahydro-2H-benzo[b][1,4]diazepin-2-one (3t)

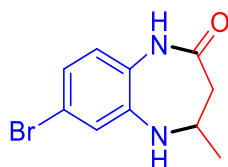

$^1\text{H}$  NMR (400 MHz, DMSO- $d_6$ , 25 °C):  $\delta$  = 9.55 (s, 1H), 9.44 (s, 0.6H), 6.82-6.89 (m, 2H), 6.60-6.76 (m, 3H), 6.45-6.52 (m, 1H), 5.65 (s, 0.8H), 5.16 (s, 1H), 3.80-3.84 (m, 2H), 2.42-2.48 (m, 2 H), 2.14-2.29 (m, 2H), 1.16-1.24 ppm (m, 6H);  $^{13}\text{C}$  NMR (101 MHz, DMSO- $d_6$ , 25 °C):  $\delta$  = 172.2, 171.7, 141.5, 136.4, 130.7, 123.9, 123.5, 121.9, 111.2, 110.9, 108.5, 108.2, 105.7, 100.0, 54.3, 52.8, 42.1, 41.9, 23.8, 23.4 ppm.

### 4,7-dimethyl-1,3,4,5-tetrahydro-benzo[b][1,4]diazepin-2-one (3u)

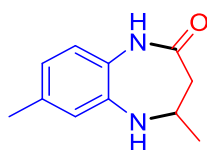

$^1\text{H}$  NMR (400 MHz, DMSO- $d_6$ , 25 °C):  $\delta$  = 9.43 (s, 1H), 9.39 (s, 0.8H), 6.71-6.83 (m, 5H), 6.57-6.60 (m, 0.8H), 5.22 (s, 0.8H), 5.07 (s, 1H), 3.85-3.88 (m, 2H), 2.43-2.49 (m, 2H), 2.22 (s, 6H), 1.21-1.24 ppm (m, 6H);  $^{13}\text{C}$  NMR (101 MHz, DMSO- $d_6$ , 25 °C):  $\delta$  = 172.1,

171.9, 139.6, 137.4, 133.8, 129.3, 129.1, 126.1, 125.5, 122.4, 122.1, 121.1, 121.0, 120.5, 54.4, 53.6, 42.0, 41.8, 23.8, 23.6, 20.9, 20.6 ppm.

#### 4,7,8-Trimethyl-1,3,4,5-tetrahydro-2H-benzo[b][1,4]diazepin-2-one (3v)

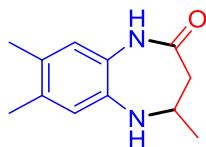

$^1\text{H}$  NMR (400 MHz, DMSO- $d_6$ , 25 °C):  $\delta$  = 9.32 (s, 1H), 6.68 (d,  $J$  = 8.8 Hz, 2H), 4.96 (s, 1H), 3.84-3.86 (m, 1H), 2.41-2.45 (m, 2 H), 2.17-2.20 (m, 1H), 2.12 (d,  $J$  = 4.8 Hz, 6H), 1.21 ppm (d,  $J$  = 30.0 Hz, 3H);  $^{13}\text{C}$  NMR (101 MHz, DMSO- $d_6$ , 25 °C):  $\delta$  = 172.0, 137.5, 132.4, 127.6, 126.9, 123.1, 122.2, 54.3, 41.8, 23.7, 19.3, 18.9 ppm.

#### 7-Methoxy-4-methyl-1,3,4,5-tetrahydro-2H-benzo[b][1,4]diazepin-2-one (3w)

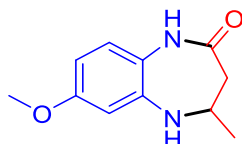

$^1\text{H}$  NMR (400 MHz, DMSO- $d_6$ , 25 °C):  $\delta$  = 9.44 (s, 1H), 9.30 (s, 0.5H), 6.87-6.89 (m, 1H), 6.80-6.82 (m, 0.8H), 6.59-6.62 (m, 0.8H), 6.49-6.54 (m, 1.6H), 6.35-6.38 (s, 0.7H), 5.35 (s, 0.8H), 4.82 (s, 1H), 3.84-3.87 (m, 2H), 3.72 (s, 4.5H), 2.43-2.48 (m, 1.8H), 2.22-2.28 (m, 0.8 H), 2.09-2.17 (m, 0.8H), 1.19-1.24 ppm (m, 5H);  $^{13}\text{C}$  NMR (101 MHz, DMSO- $d_6$ , 25 °C):  $\delta$  = 172.3, 171.7, 156.9, 154.1, 141.0, 133.5, 131.6, 123.1, 122.3, 121.7, 110.3, 107.7, 105.4, 105.3, 55.7, 55.4, 55.3, 53.4, 41.9, 41.6, 23.8, 23.4 ppm.

#### 4-Methyl-1,3,4,5-tetrahydro-2H-naphtho[2,3-b][1,4]diazepin-2-one (3x)

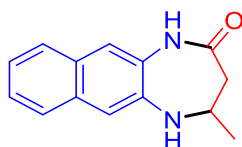

$^1\text{H}$  NMR (400 MHz, DMSO- $d_6$ , 25 °C):  $\delta$  = 9.84 (s, 1H), 7.66-7.73 (m, 2H), 7.27-7.40 (m, 4H), 5.55-5.56 (m, 1H), 3.92-3.94 (m, 1H), 2.52-2.55 (m, 1H), 2.21-2.28 (m, 1H), 1.27 ppm (d,  $J$  = 8.4 Hz, 3H);  $^{13}\text{C}$  NMR (101 MHz, DMSO- $d_6$ , 25 °C):  $\delta$  = 171.9, 140.0, 132.2, 131.9, 129.0, 127.1, 125.4, 123.9, 118.6, 116.0, 54.1, 41.0, 23.4 ppm.

#### 5-Methyl-2-(naphthalen-2-yl)pyrazolidin-3-one (3aa)

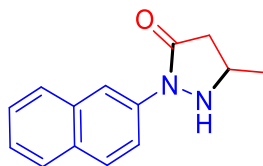

$^1\text{H}$  NMR (400 MHz, DMSO- $d_6$ , 25 °C):  $\delta$  = 8.15-8.17 (m, 2H), 7.85-7.91 (m, 3H), 7.40-7.51 (m, 2H), 6.26 (d,  $J$  = 12.4 Hz, 1H), 3.64-3.72 (m, 1H), 2.76-2.84 (m, 1H), 2.39-2.47 (m, 1H), 1.25 ppm (d,  $J$  = 8.8 Hz, 3H);  $^{13}\text{C}$  NMR (101 MHz, DMSO- $d_6$ , 25 °C):  $\delta$  = 173.0, 137.6,

133.6, 130.1, 128.6, 127.9, 126.9, 125.2, 118.5, 114.5, 56.5, 42.6, 19.0 ppm.

### 5-Methylpyrazolidin-3-one (3ab)

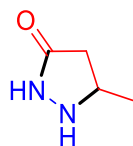

$^1\text{H}$  NMR (400 MHz, DMSO- $d_6$ , 25 °C):  $\delta$  = 8.95 (s, 1H), 5.00 (s, 1H), 3.45-3.57 (m, 1H), 2.29-2.36 (m, 1H), 1.90-1.98 (m, 1H), 1.09 ppm (d,  $J$  = 8.8 Hz, 3H);  $^{13}\text{C}$  NMR (101 MHz, DMSO- $d_6$ , 25 °C):  $\delta$  = 176.8, 53.9, 18.8 ppm.

### 5-Methyl-2-phenylpyrazolidin-3-one (3ac)

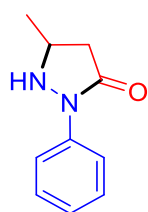

$^1\text{H}$  NMR (400 MHz, DMSO- $d_6$ , 25 °C):  $\delta$  = 7.77-7.80 (m, 2H), 7.31-7.36 (m, 2H), 7.04-7.09 (m, 1H), 6.10 (d,  $J$  = 8.4 Hz, 1H), 3.55-3.69 (m, 1H), 2.69-2.77 (m, 1H), 2.32-2.40 (m, 1H), 1.19 ppm (d,  $J$  = 8.4 Hz, 3H);  $^{13}\text{C}$  NMR (101 MHz, DMSO- $d_6$ , 25 °C):  $\delta$  = 172.7, 139.9, 128.9, 123.7, 118.1, 50.5, 42.5, 18.5 ppm.

### 5-Methyl-2-(*p*-tolyl)pyrazolidin-3-one (3ad)

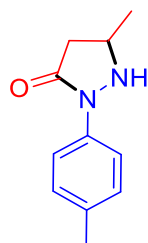

$^1\text{H}$  NMR (400 MHz, DMSO- $d_6$ , 25 °C):  $\delta$  = 7.65-7.67 (m, 2H), 7.13-7.15 (m, 2H), 6.07 (d,  $J$  = 12.0 Hz, 1H), 3.55-3.65 (m, 1H), 2.67-2.74 (m, 1H), 2.29-2.37 (m, 1H), 2.26 (s, 3H), 1.18 ppm (d,  $J$  = 8.8 Hz, 3H);  $^{13}\text{C}$  NMR (101 MHz, DMSO- $d_6$ , 25 °C):  $\delta$  = 172.3, 137.5, 132.7, 129.3, 118.2, 50.5, 42.6, 20.9, 18.5 ppm.

### 5-Methyl-2-(*m*-tolyl)pyrazolidin-3-one (3ae)

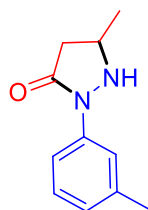

$^1\text{H}$  NMR (400 MHz, DMSO- $d_6$ , 25 °C):  $\delta$  = 7.60-7.62 (m, 2H), 7.19-7.24 (m, 1H), 6.87-6.90 (m, 1H), 6.07 (d,  $J$  = 12.0 Hz, 1H), 3.55-3.65 (m, 1H), 2.68-2.76 (m, 1H), 2.3-2.38 (m, 1H),



2.29 (s, 3H), 1.19 ppm (d,  $J = 8.8$  Hz, 3H);  $^{13}\text{C}$  NMR (101 MHz,  $\text{DMSO-}d_6$ , 25 °C):  $\delta = 172.6, 139.9, 138.1, 128.8, 124.4, 118.6, 115.4, 50.5, 42.5, 21.7, 18.5$  ppm.

#### 2-(4-Methoxyphenyl)-5-methylpyrazolidin-3-one (3af)

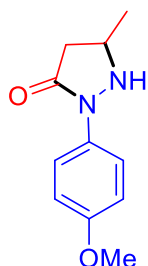

$^1\text{H}$  NMR (400 MHz,  $\text{DMSO-}d_6$ , 25 °C):  $\delta = 7.67\text{-}7.70$  (m, 2H), 6.90-6.93 (m, 2H), 6.07 (d,  $J = 12.4$  Hz, 1H), 3.73 (s, 3H), 3.56-3.66 (m, 1H), 2.66-2.74 (m, 1H), 2.28-2.36 (m, 1H), 1.19 ppm (d,  $J = 8.4$  Hz, 3H);  $^{13}\text{C}$  NMR (101 MHz,  $\text{DMSO-}d_6$ , 25 °C):  $\delta = 171.8, 155.7, 133.4, 119.8, 114.1, 55.7, 50.6, 42.3, 18.6$  ppm.

#### 2-(4-Fluorophenyl)-5-methylpyrazolidin-3-one (3ag)

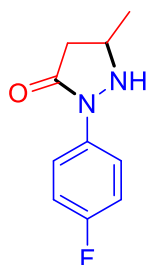

$^1\text{H}$  NMR (400 MHz,  $\text{DMSO-}d_6$ , 25 °C):  $\delta = 7.81\text{-}7.88$  (m, 2H), 7.19-7.28 (m, 2H), 6.20 (d,  $J = 12.0$  Hz, 1H), 3.60-3.75 (m, 1H), 2.75-2.82 (m, 1H), 2.37-2.45 (m, 1H), 1.24 ppm (d,  $J = 8.8$  Hz, 3H);  $^{13}\text{C}$  NMR (101 MHz,  $\text{DMSO-}d_6$ , 25 °C):  $\delta = 172.5, 160.0, 156.8, 136.3$  ( $J_{\text{C-F}} = 3.0$  Hz), 139.9 ( $J_{\text{C-F}} = 10.0$  Hz), 115.7, 115.4, 50.6, 42.3, 18.5 ppm;  $^{19}\text{F}$  NMR (400 MHz,  $\text{DMSO-}d_6$ , 25 °C):  $\delta = -119.4$  ppm.

#### 2-(4-Chlorophenyl)-5-methylpyrazolidin-3-one (3ah)

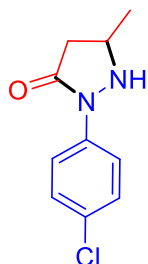

$^1\text{H}$  NMR (400 MHz,  $\text{DMSO-}d_6$ , 25 °C):  $\delta = 7.79\text{-}7.82$  (m, 2H), 7.38-7.41 (m, 2H), 6.15 (d,  $J = 12.0$  Hz, 1H), 3.55-3.70 (m, 1H), 2.70-2.78 (m, 1H), 2.33-2.41 (m, 1H), 1.19 ppm (d,  $J = 8.8$  Hz, 3H);  $^{13}\text{C}$  NMR (101 MHz,  $\text{DMSO-}d_6$ , 25 °C):  $\delta = 173.0, 138.7, 128.9, 127.3, 119.6, 50.6, 42.3, 18.4$  ppm.

#### 2-(4-Bromophenyl)-5-methylpyrazolidin-3-one (3ai)

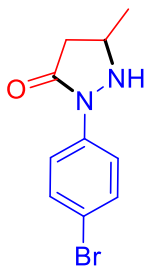

$^1\text{H}$  NMR (400 MHz, DMSO- $d_6$ , 25 °C):  $\delta$  = 7.74-7.77 (m, 2H), 7.52-7.54 (m, 2H), 6.15 (d,  $J$  = 12.0 Hz, 1H), 3.60-3.65 (m, 1H), 2.70-2.76 (m, 1H), 2.33-2.41 (m, 1H), 1.19 ppm (d,  $J$  = 8.8 Hz, 3H);  $^{13}\text{C}$  NMR (101 MHz, DMSO- $d_6$ , 25 °C):  $\delta$  = 173.0, 139.1, 131.8, 119.9, 115.4, 50.6, 42.4, 18.4 ppm.

### 2-(4-iodophenyl)-5-methylpyrazolidin-3-one (3aj)

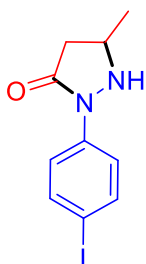

$^1\text{H}$  NMR (400 MHz, DMSO- $d_6$ , 25 °C):  $\delta$  = 7.60-7.70 (m, 4H), 6.12 (d,  $J$  = 12.0 Hz, 1H), 3.57-3.67 (m, 1H), 2.69-2.77 (m, 1H), 2.32-2.40 (m, 1H), 1.19 ppm (d,  $J$  = 8.8 Hz, 3H);  $^{13}\text{C}$  NMR (101 MHz, DMSO- $d_6$ , 25 °C):  $\delta$  = 173.0, 139.6, 137.6, 120.2, 87.3, 50.6, 42.4, 18.4 ppm.

2H-1,4-Benzothiazin-3-one (2a)

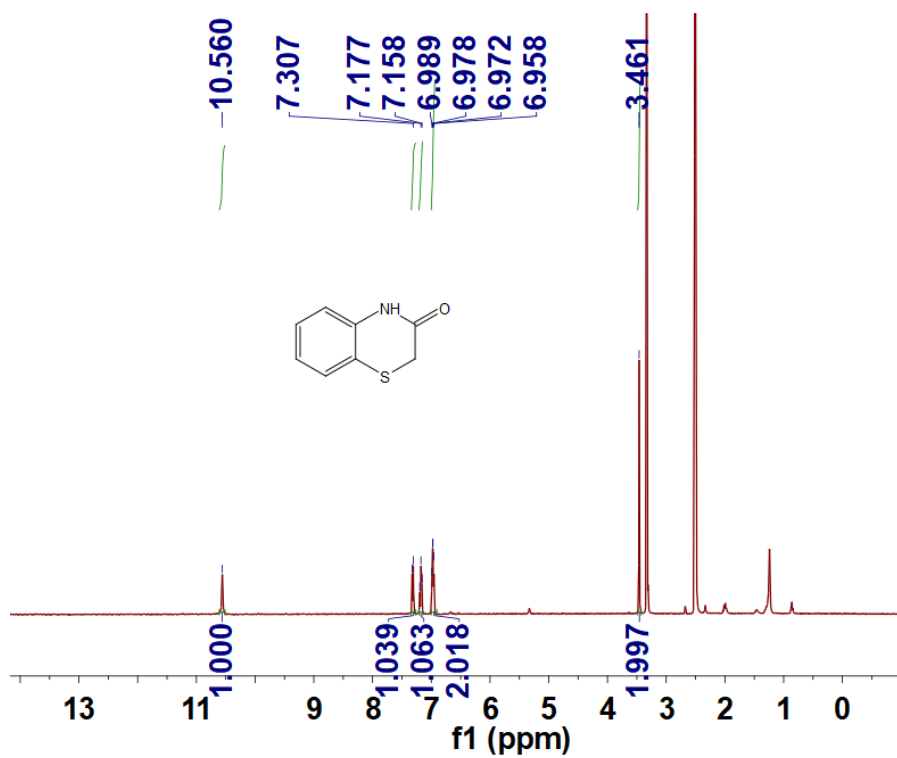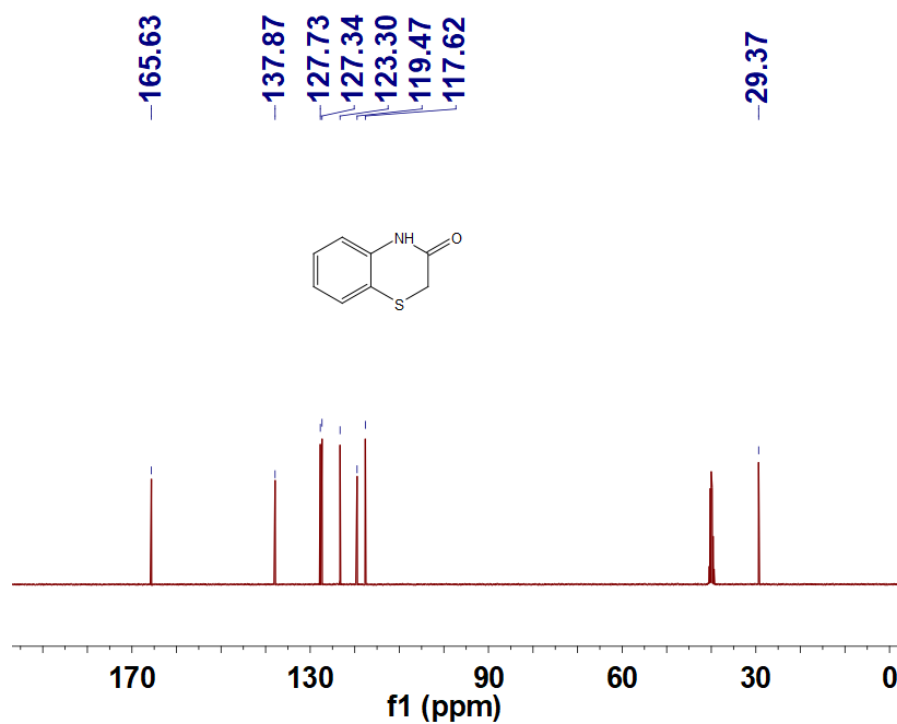

1,3-Benzothiazol-2-ylmethanol (3a)

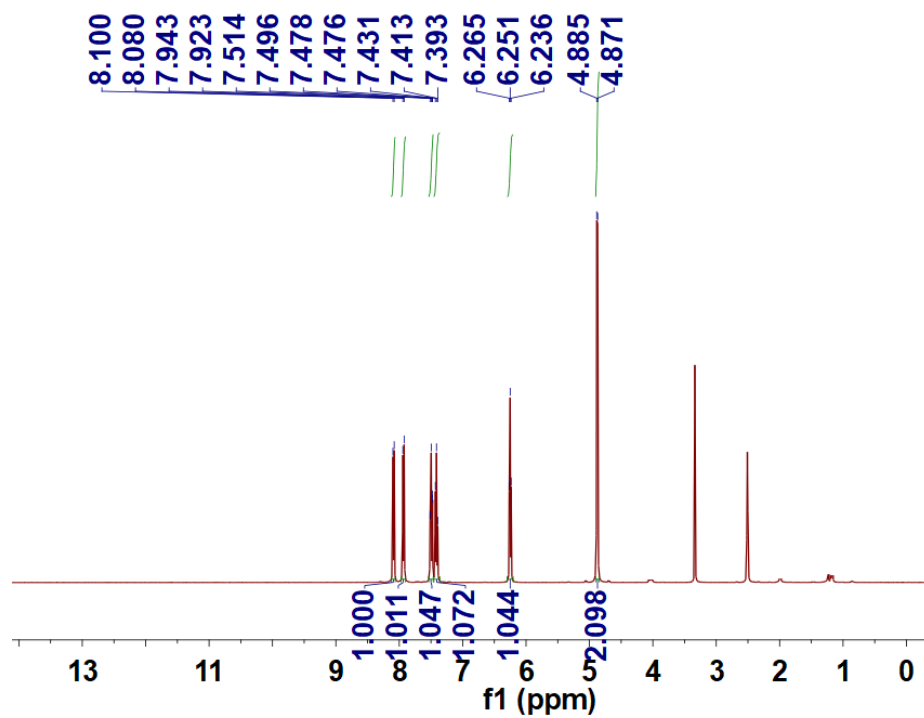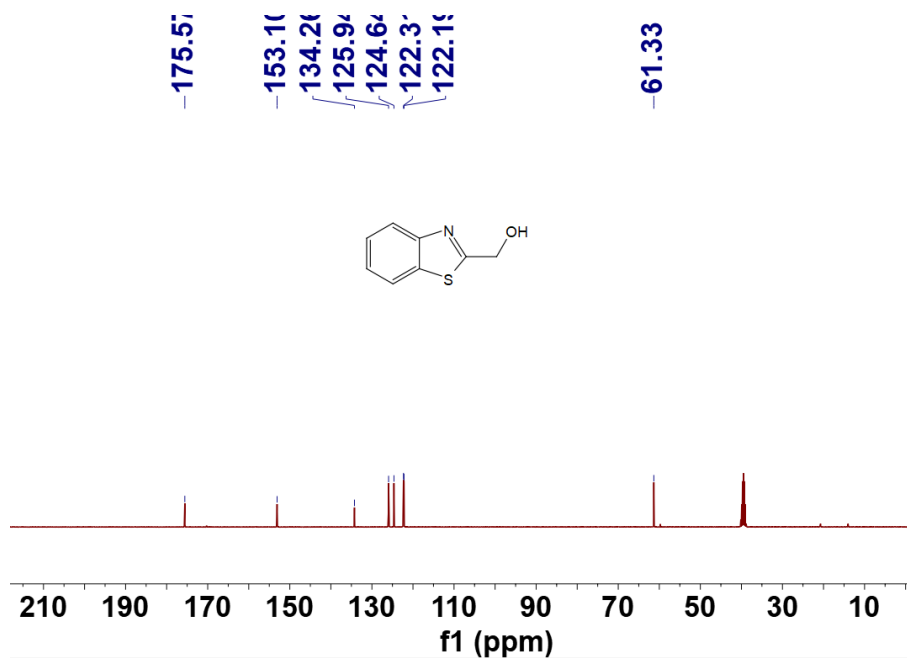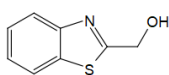

2-(Hydroxymethyl)benzimidazole (3b)

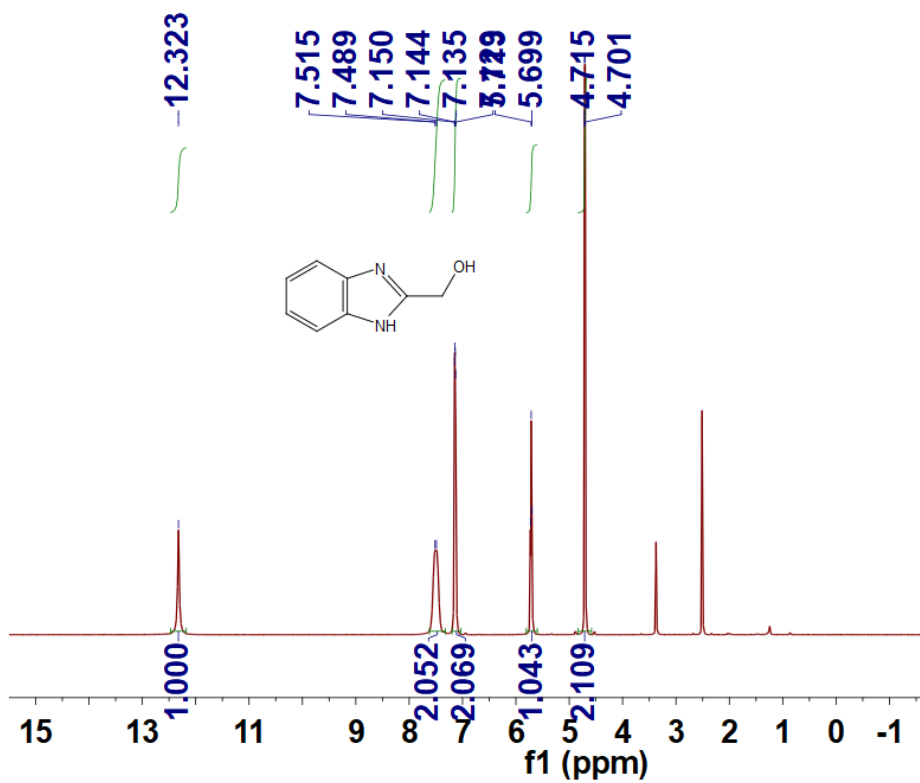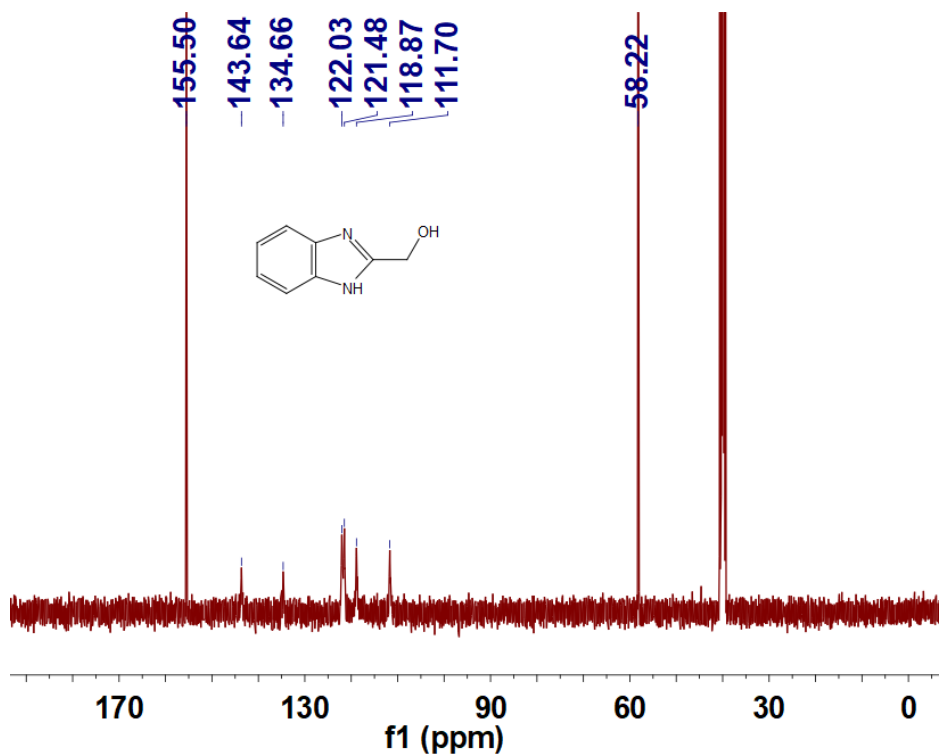

Glycolic acid (3c)

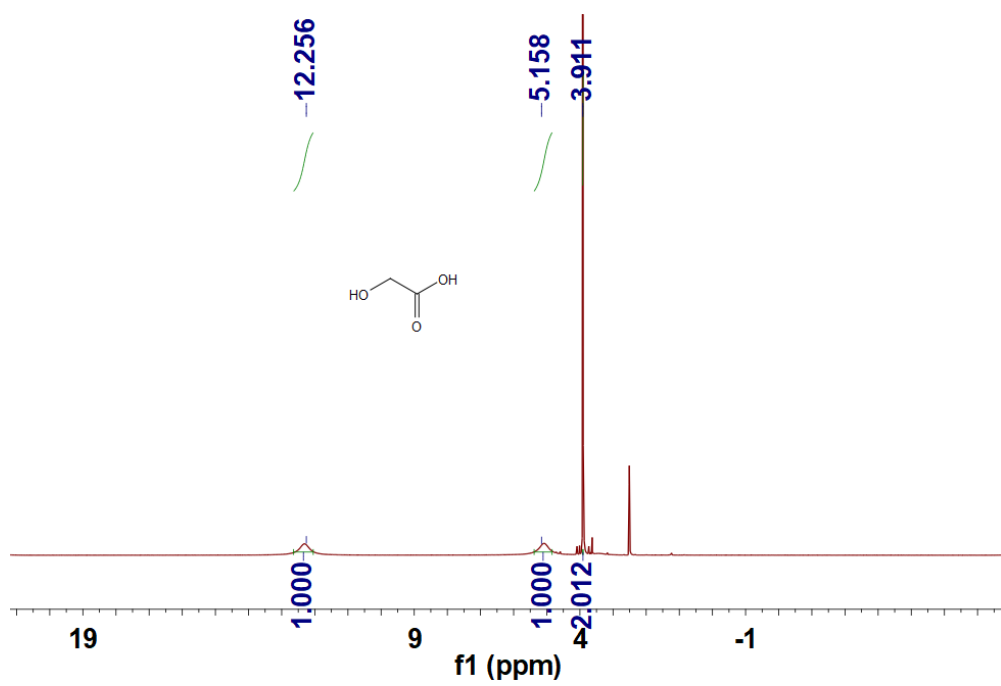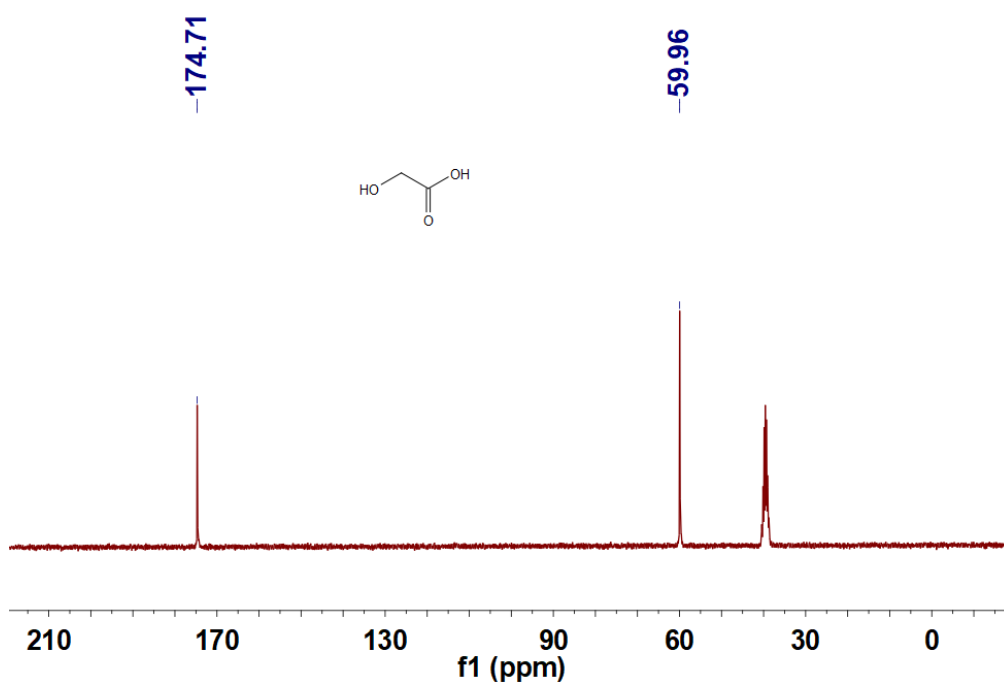

Glycolic acid methyl ester (3d)

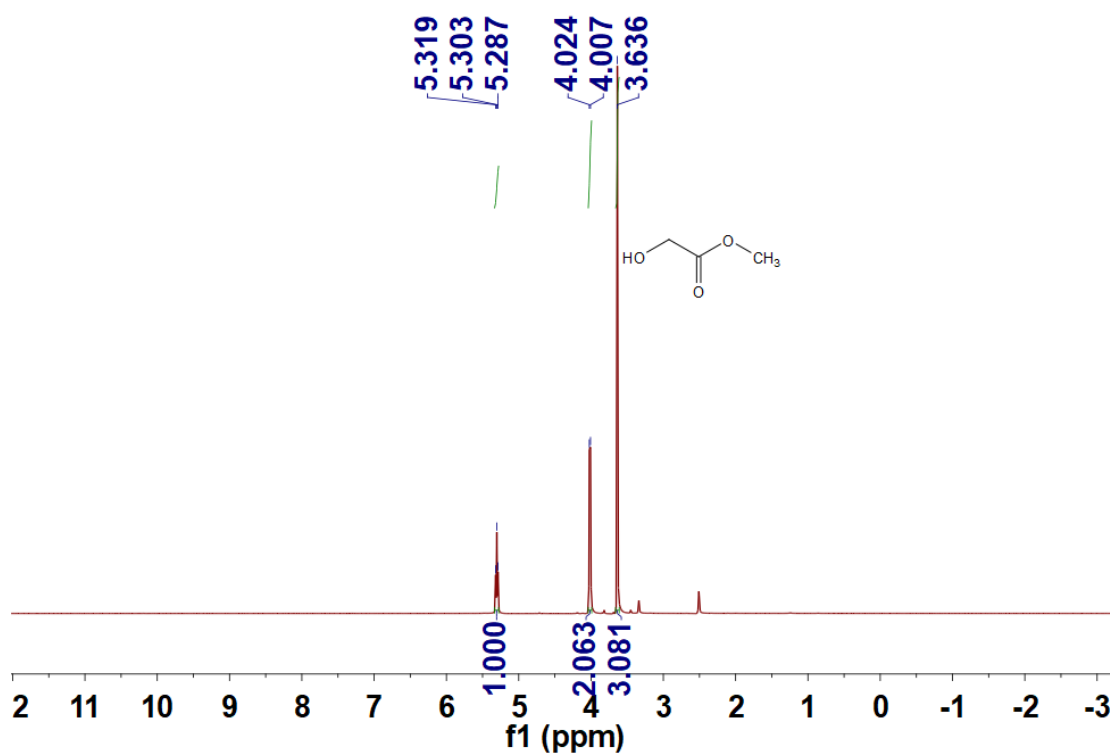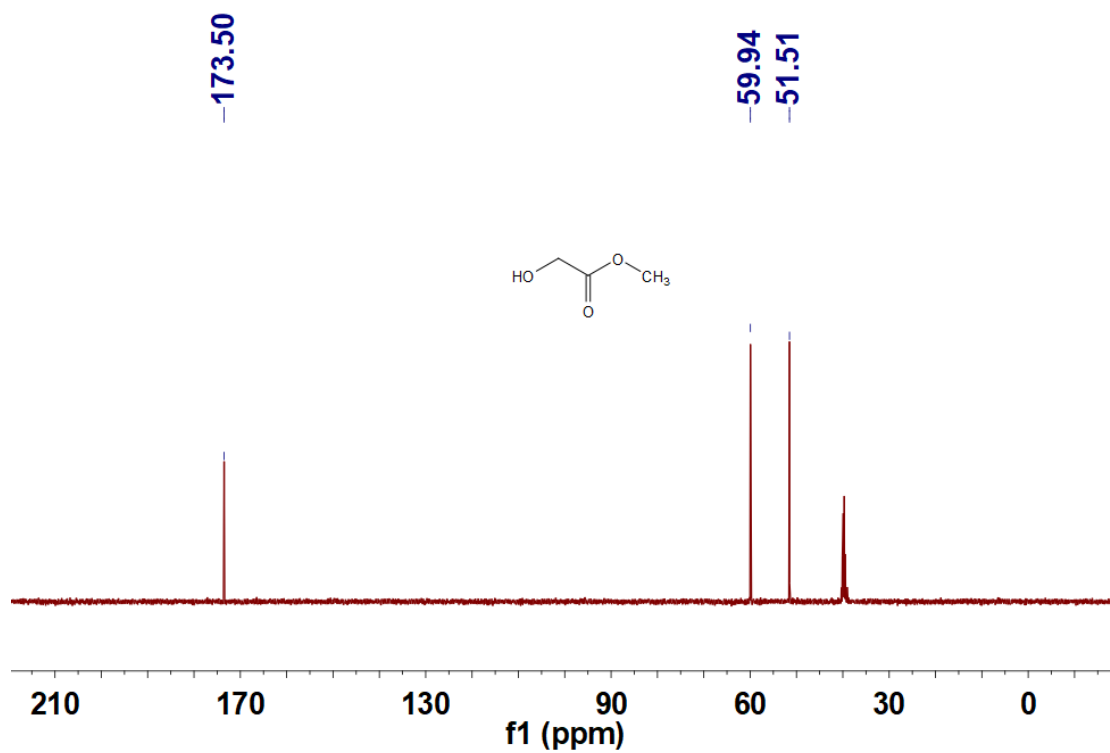

# Glycolanilide (3e)

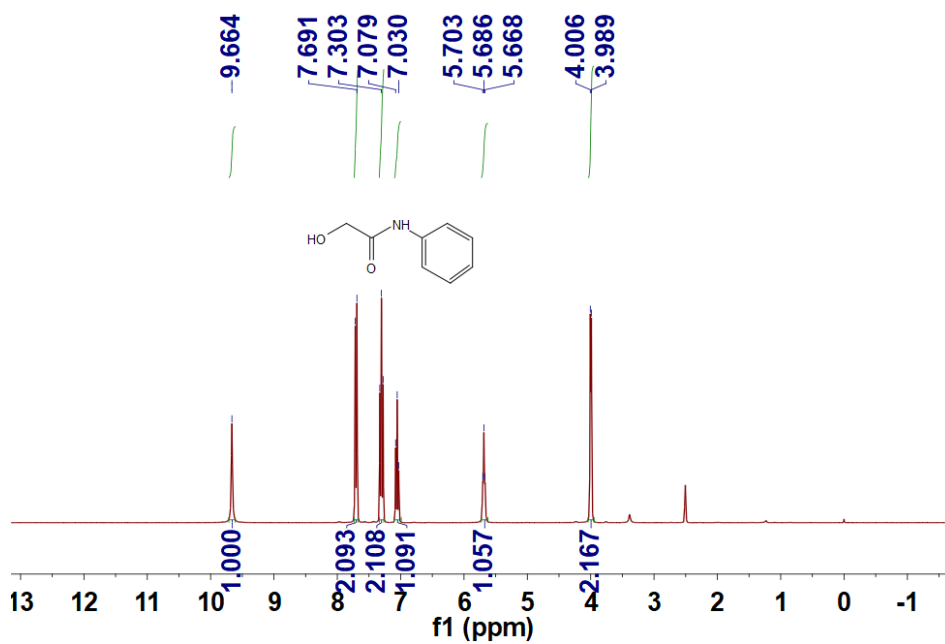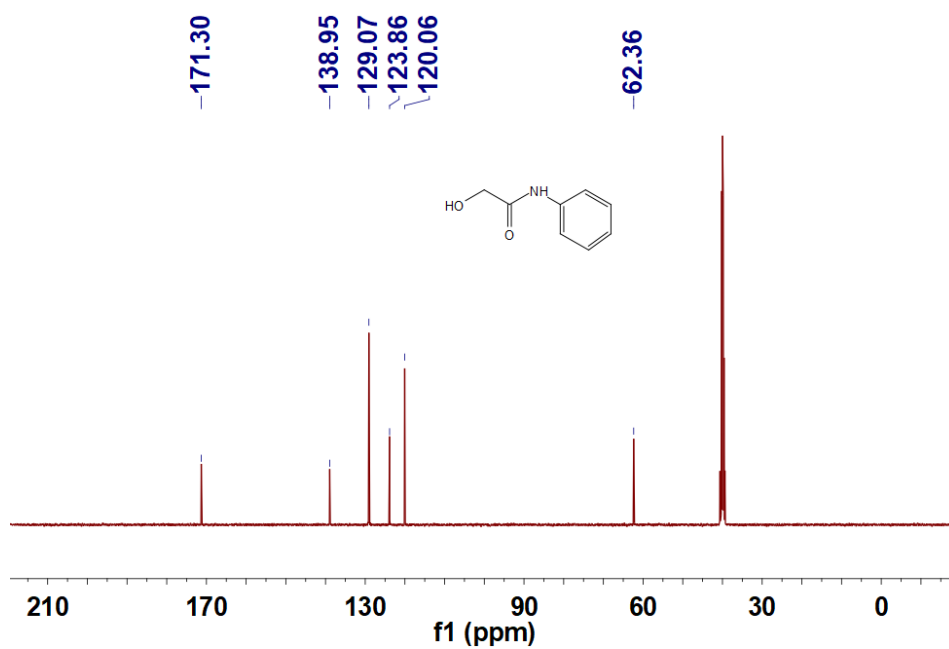



N, N-Diethyl-2-hydroxyacetamide (3f)

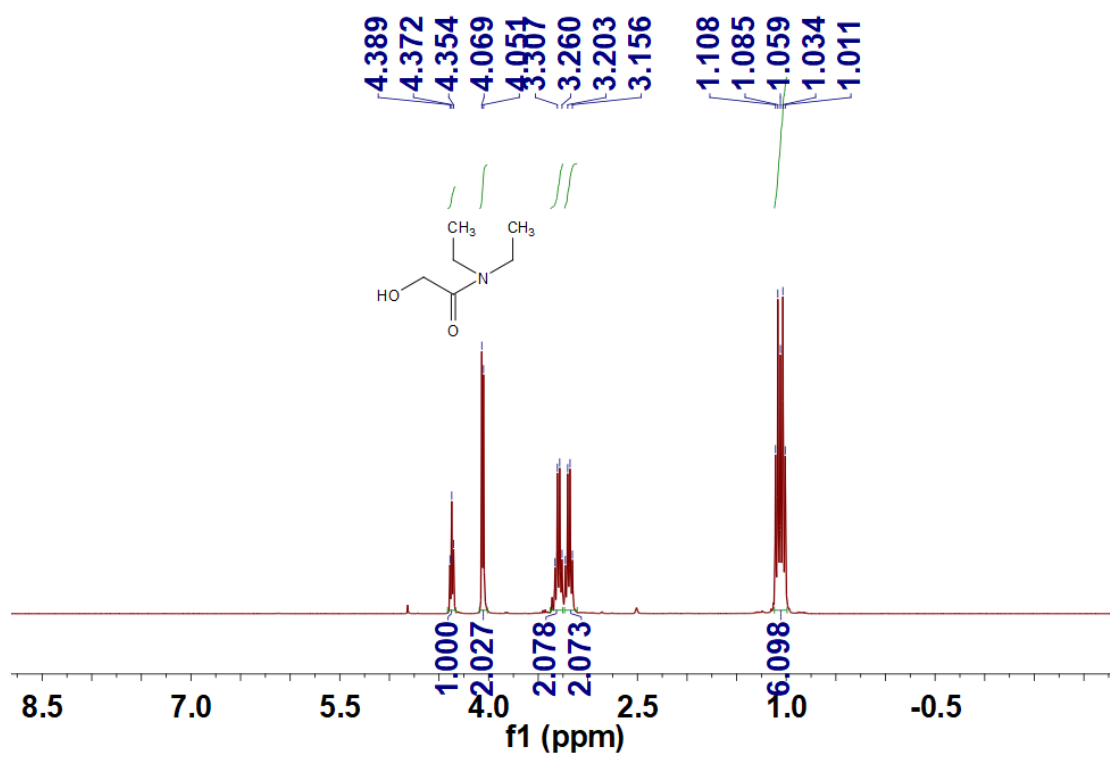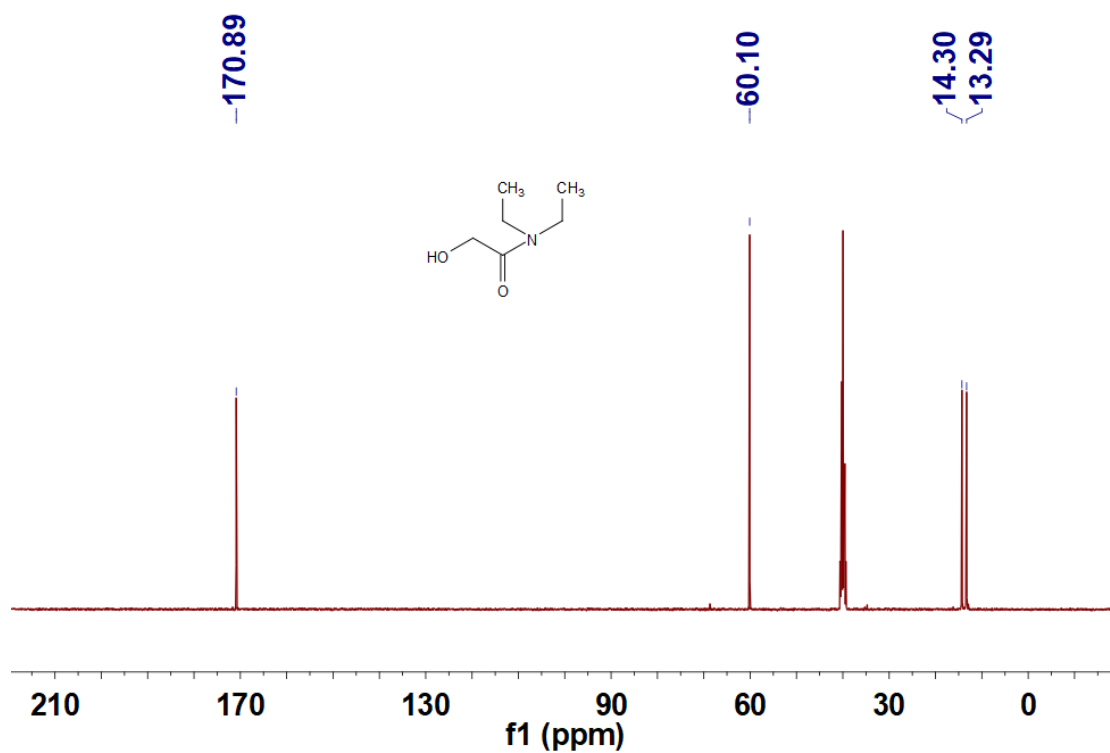

1-(Benzo[d]thiazol-2-yl)ethan-1-ol (3g)

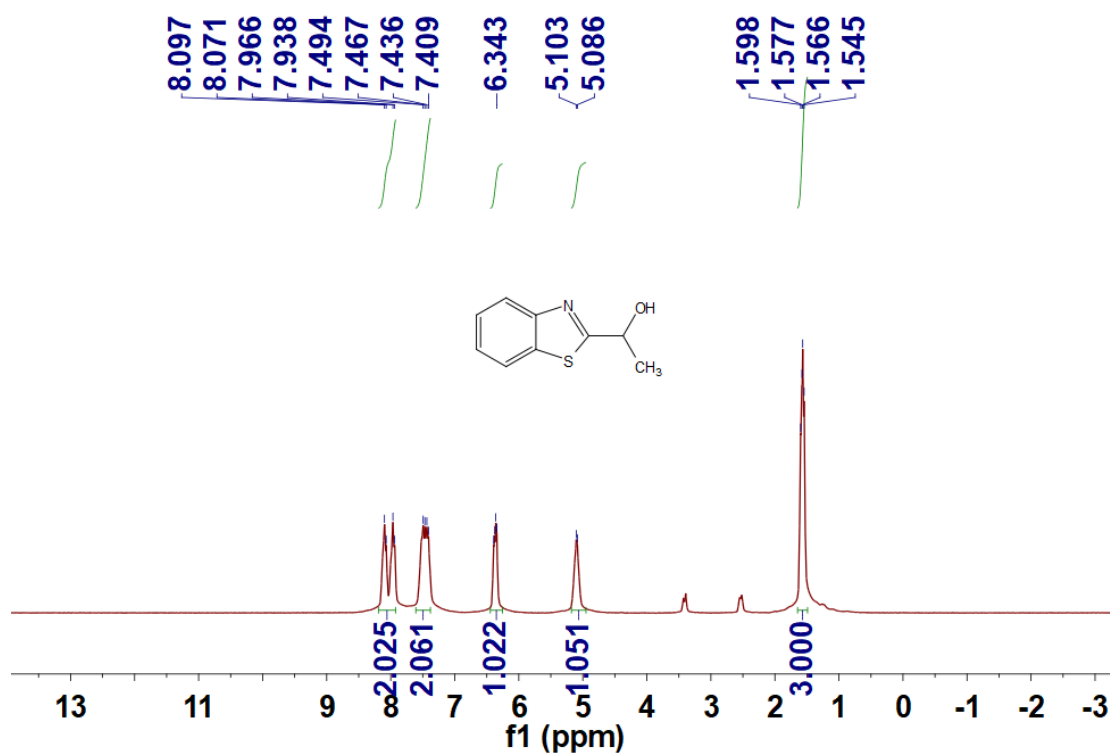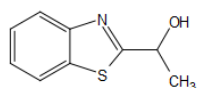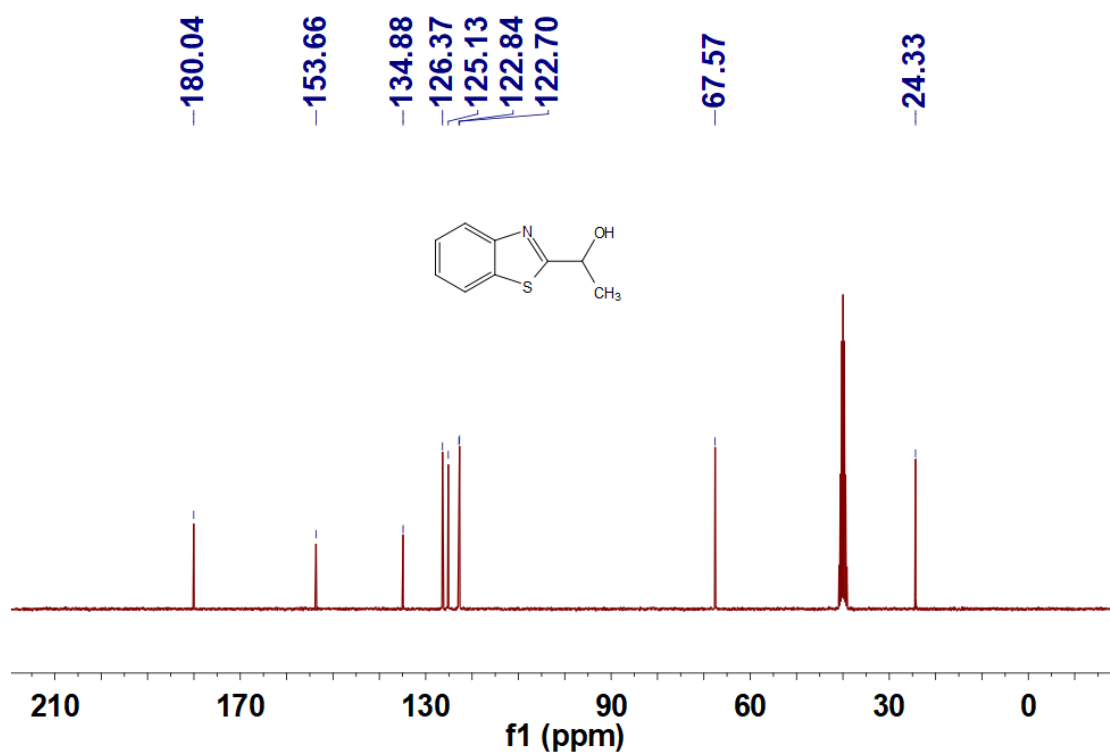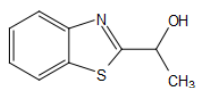

1-benzimidazol-2-ylethanol (3h)

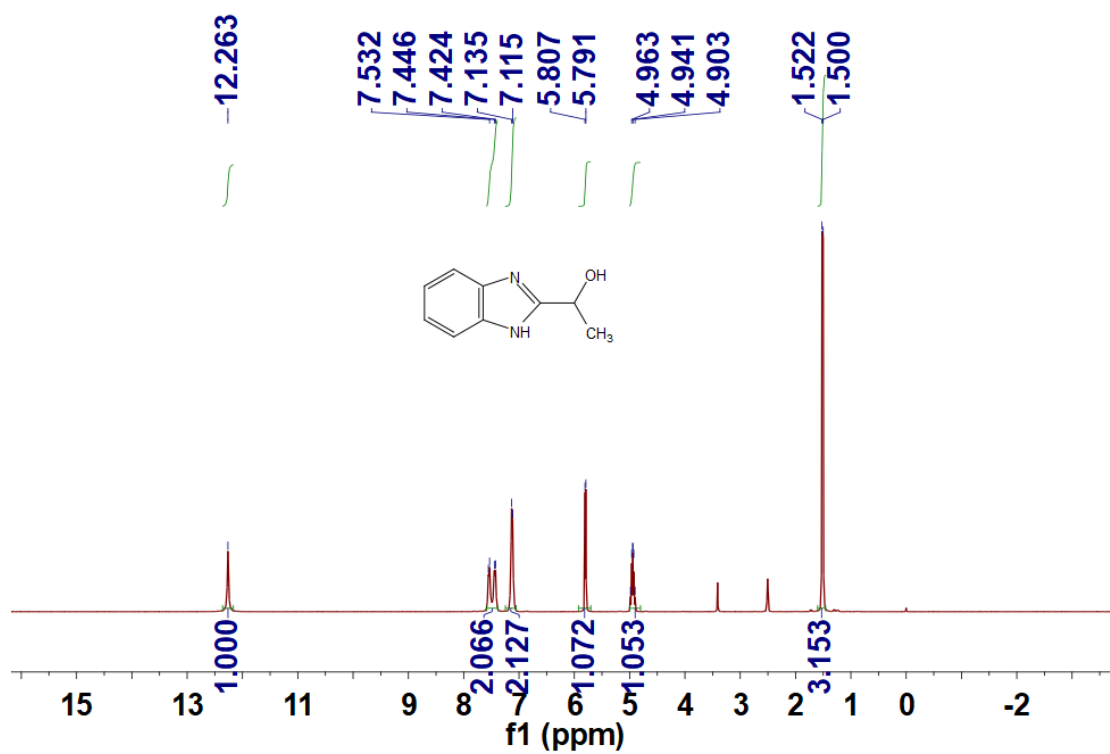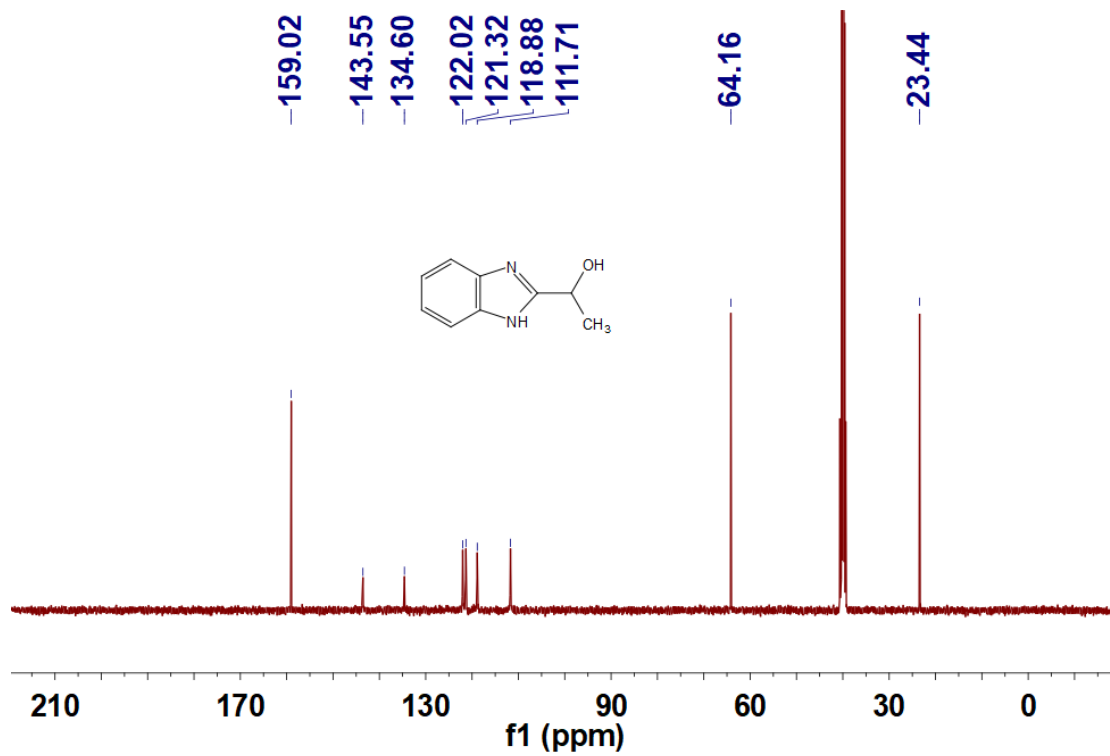

Lactanilide (3i)

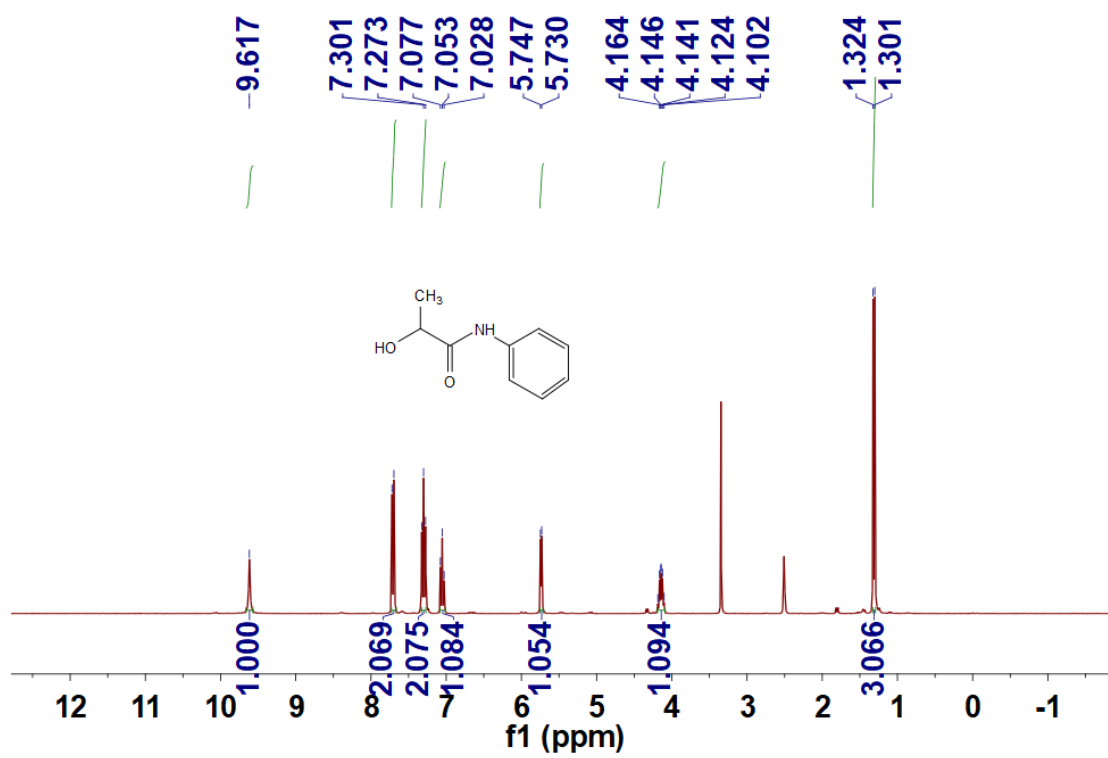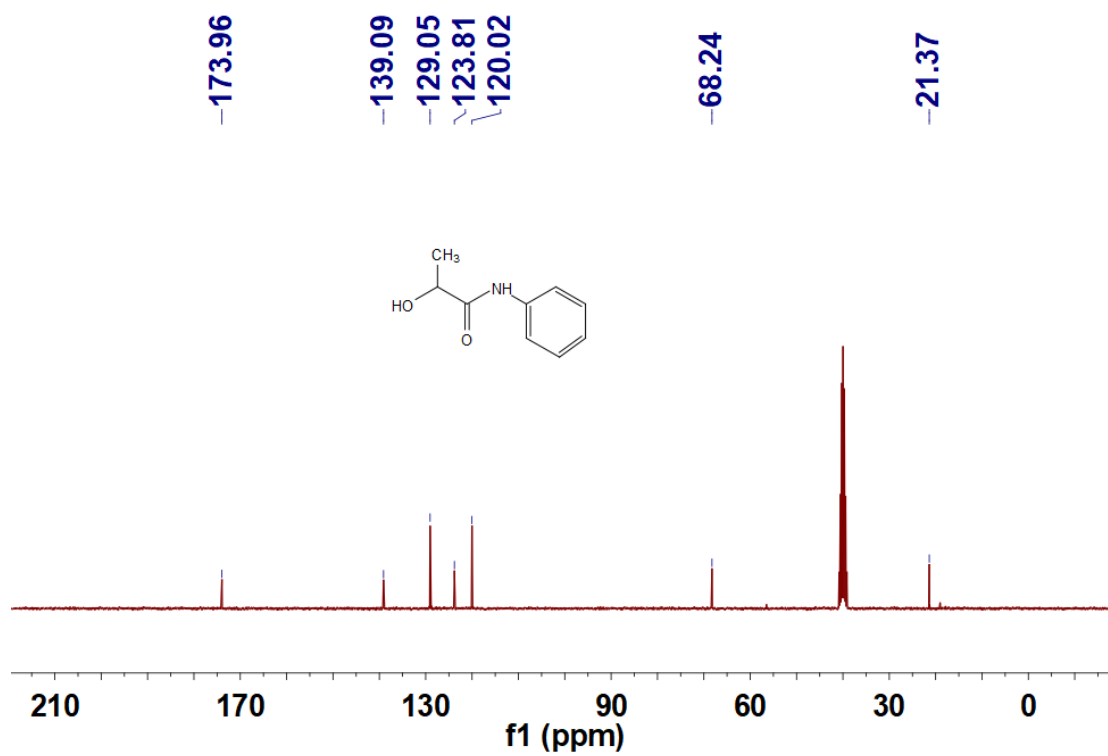

Lactic acid (3g)

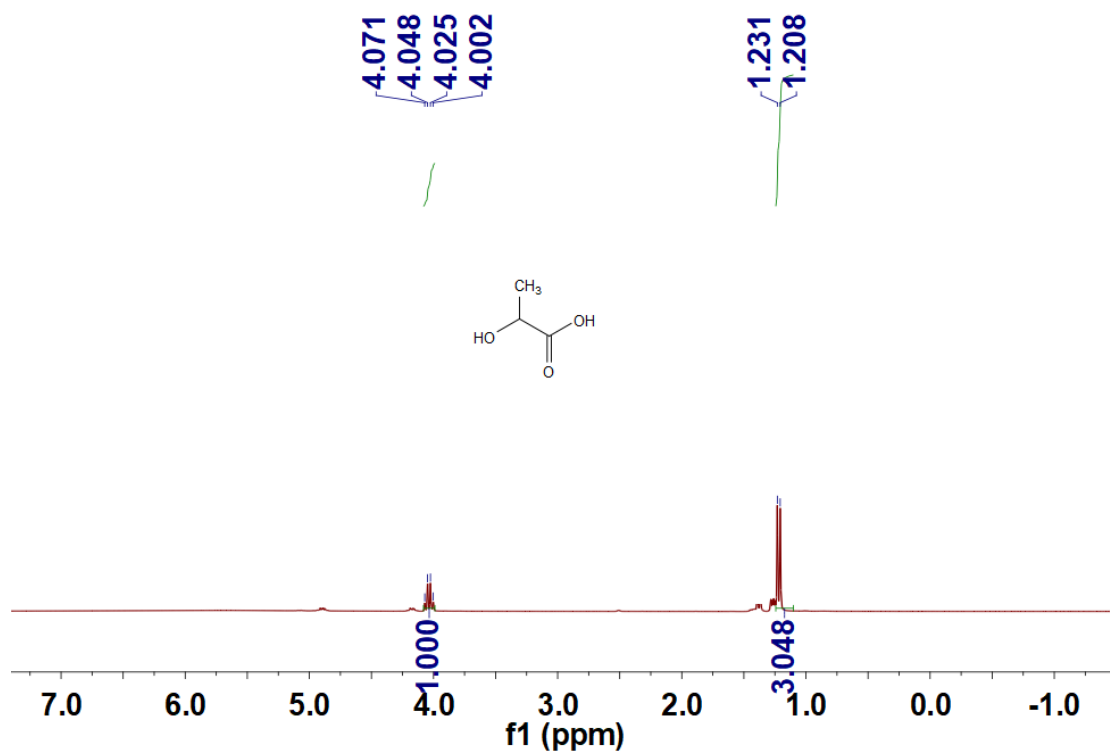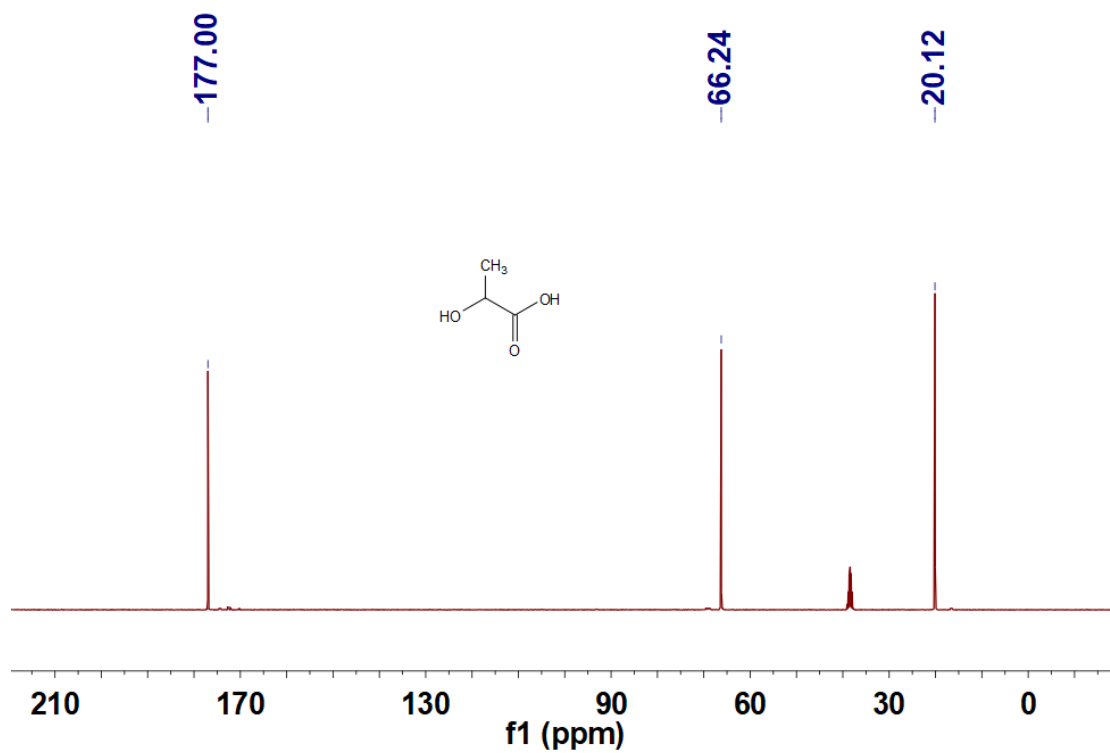

Methyl lactate (3k)

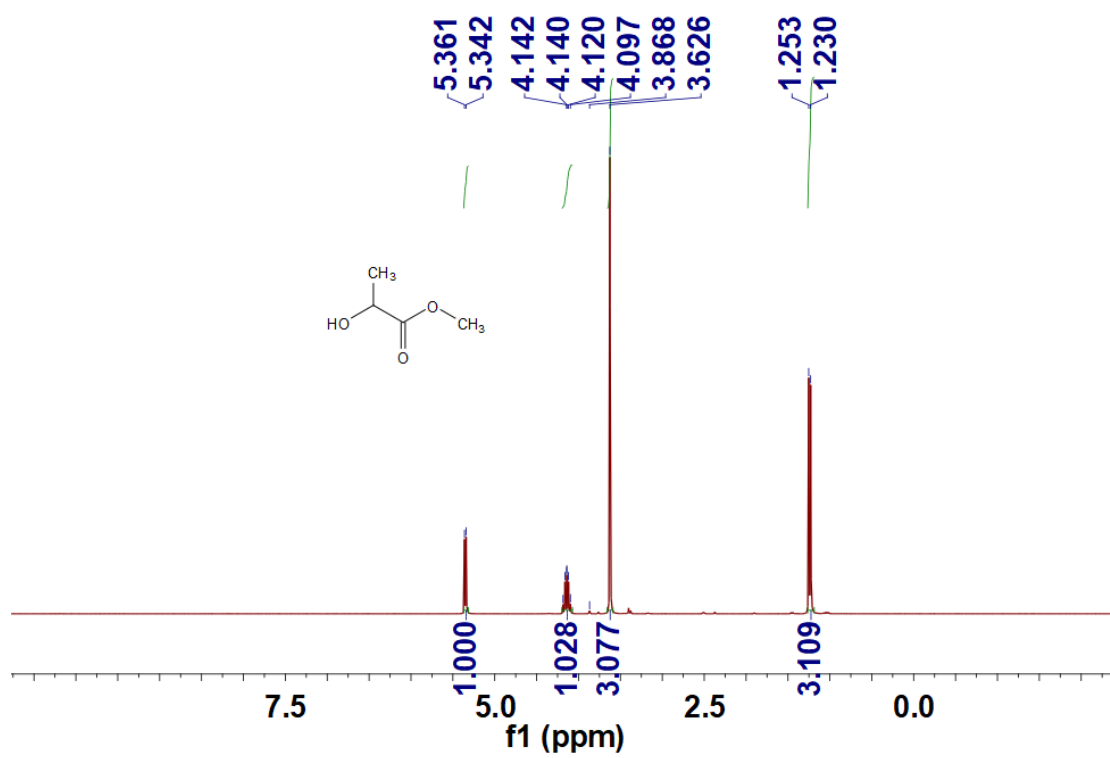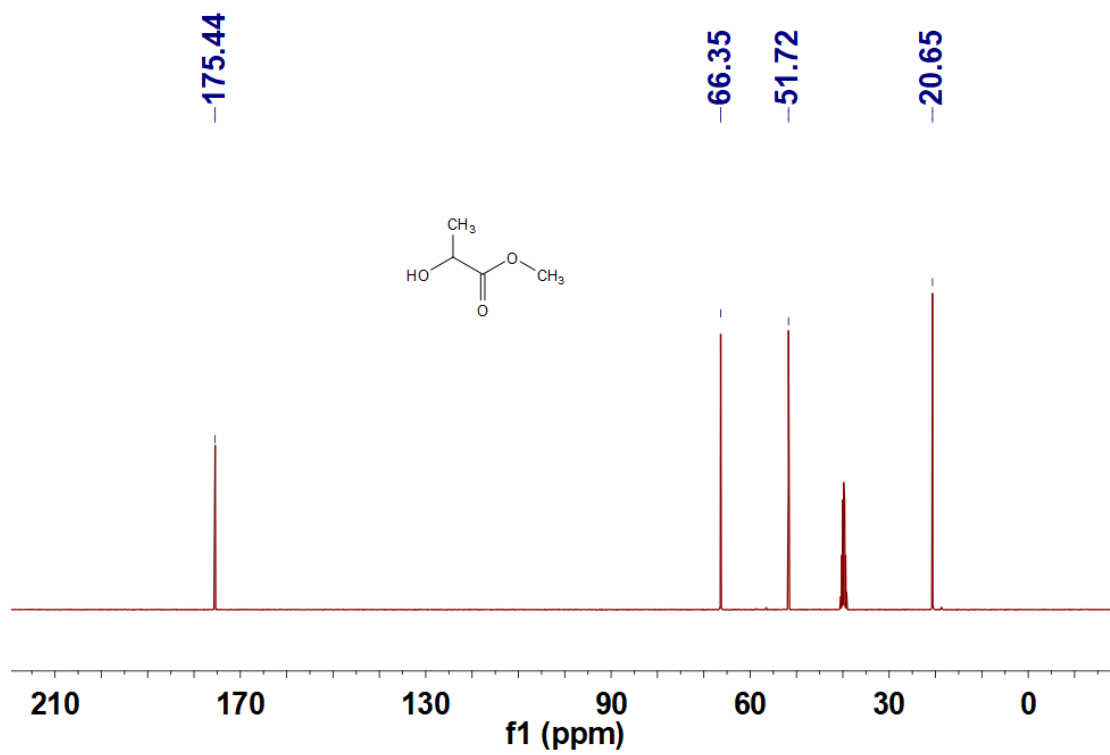

Ethyl lactate (3l)

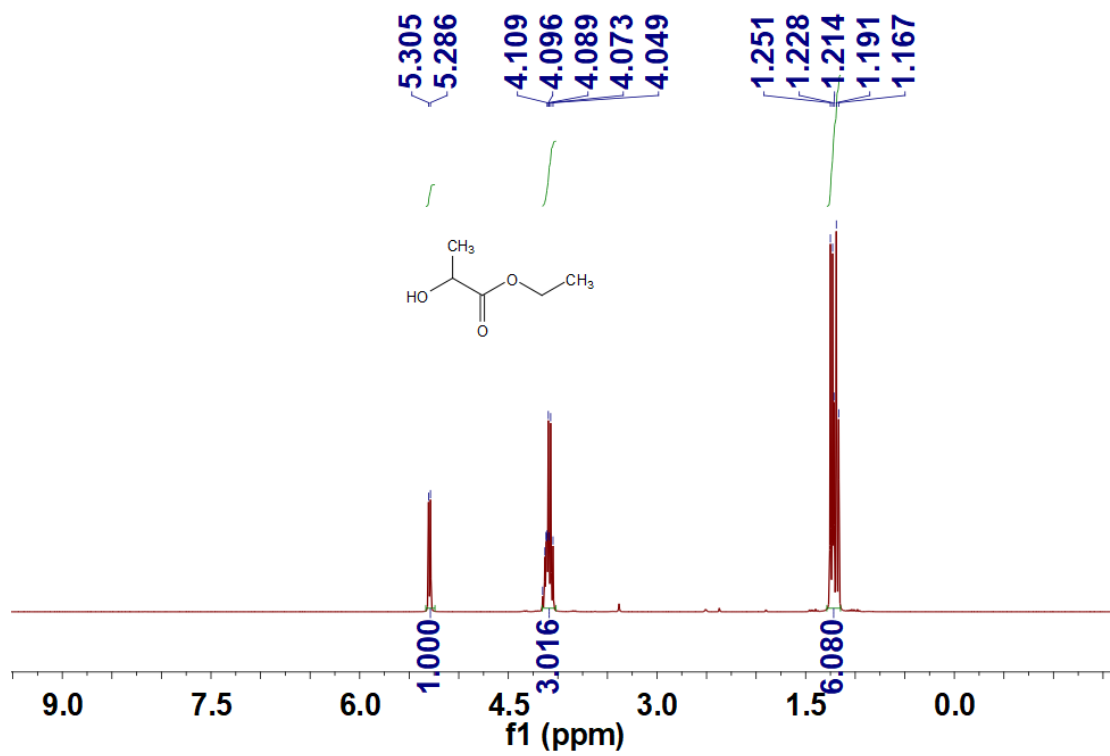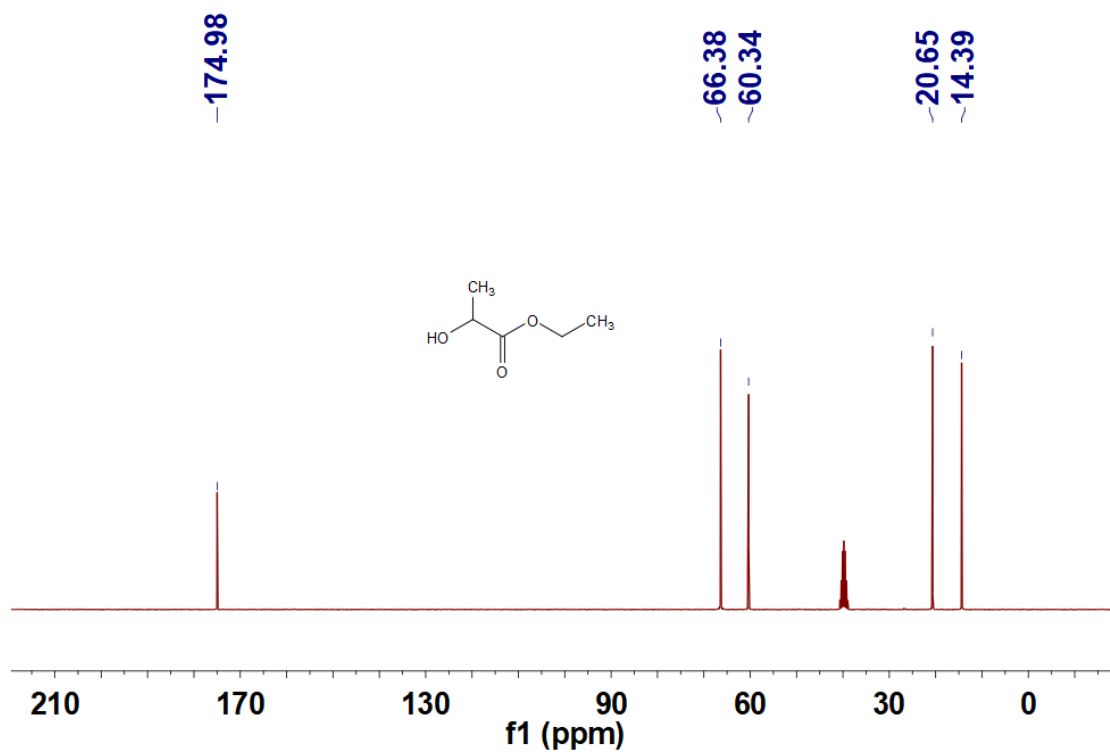

2-Hydroxy-1-(pyrrolidin-1-yl)propan-1-one (3m)

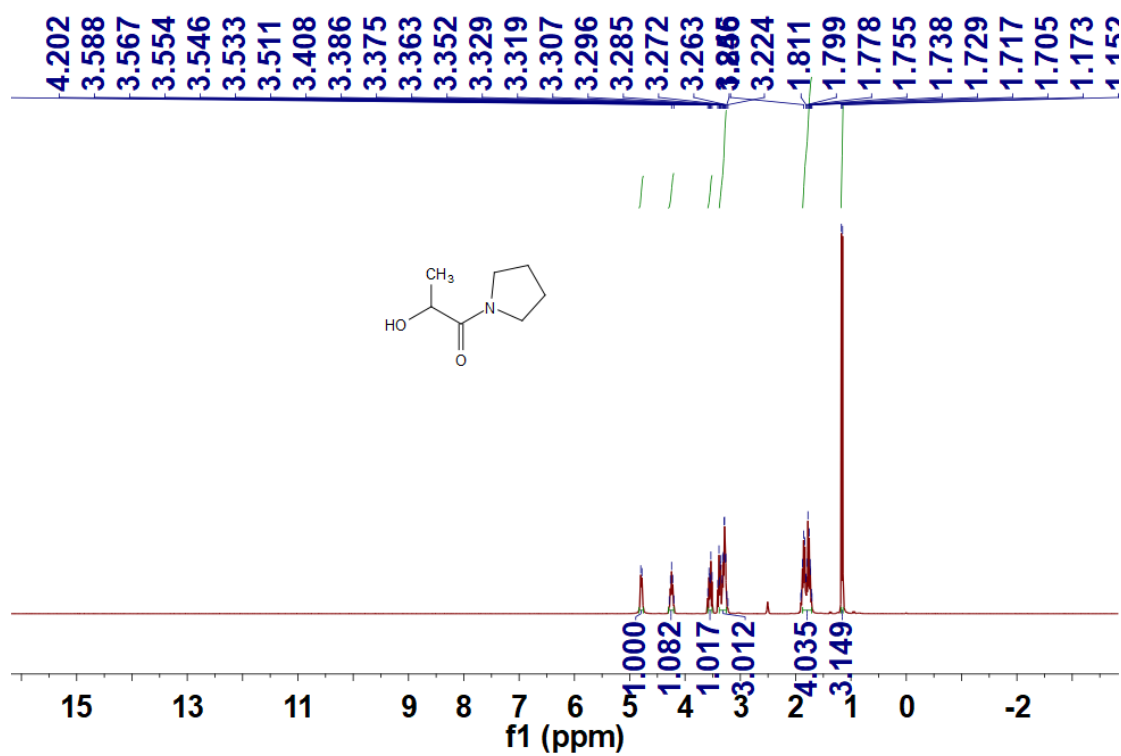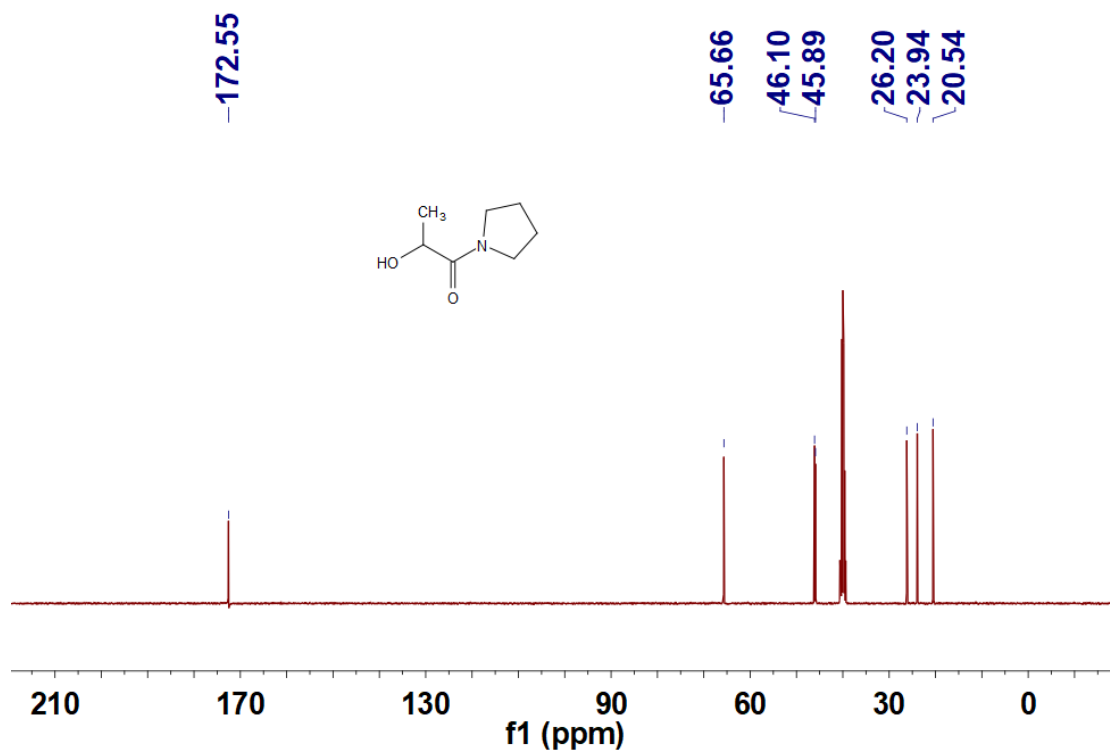



Methyl crotonate (3n)

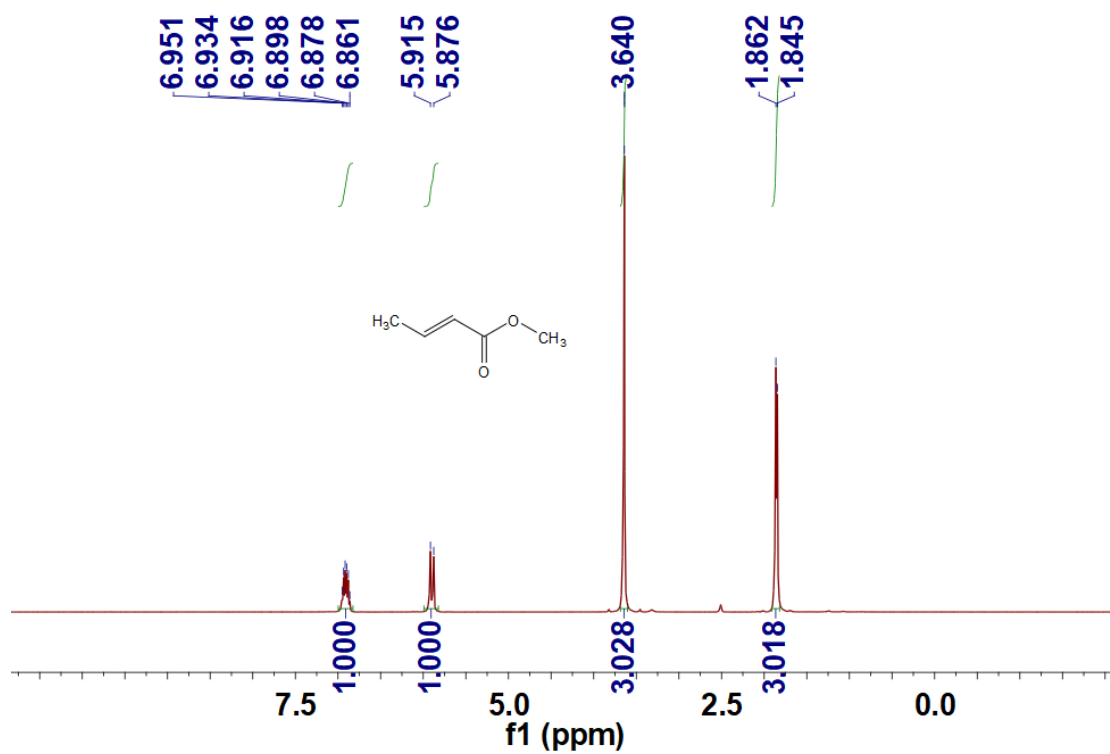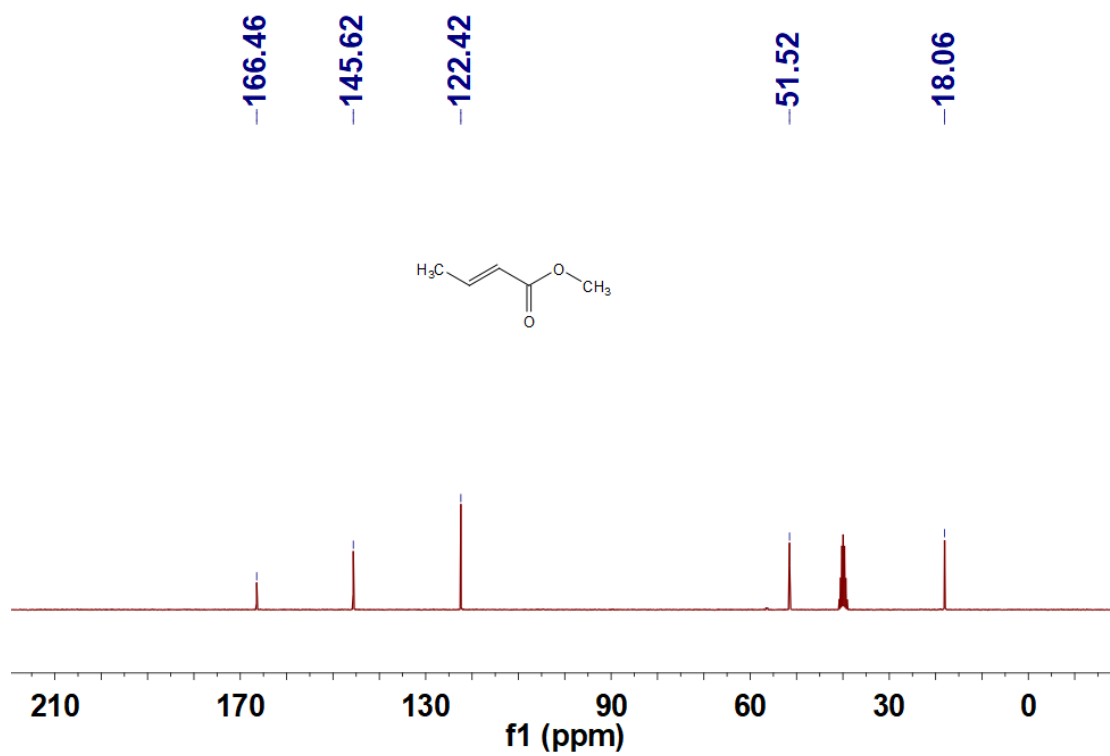

Ethyl crotonate (3o)

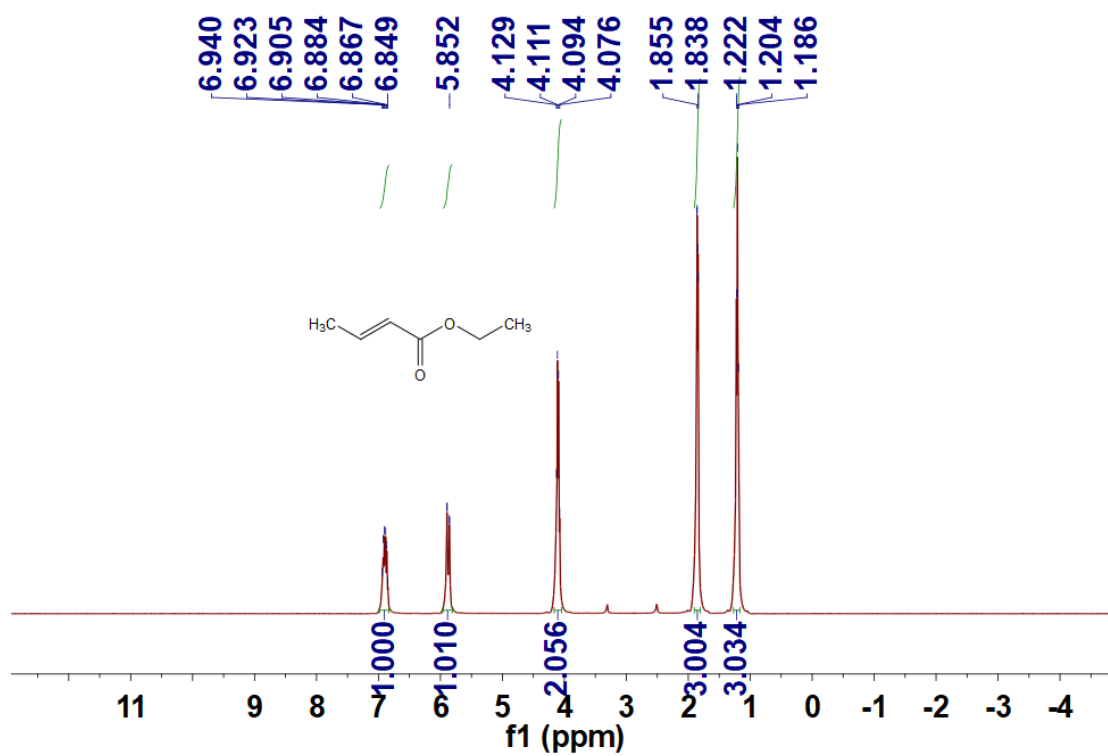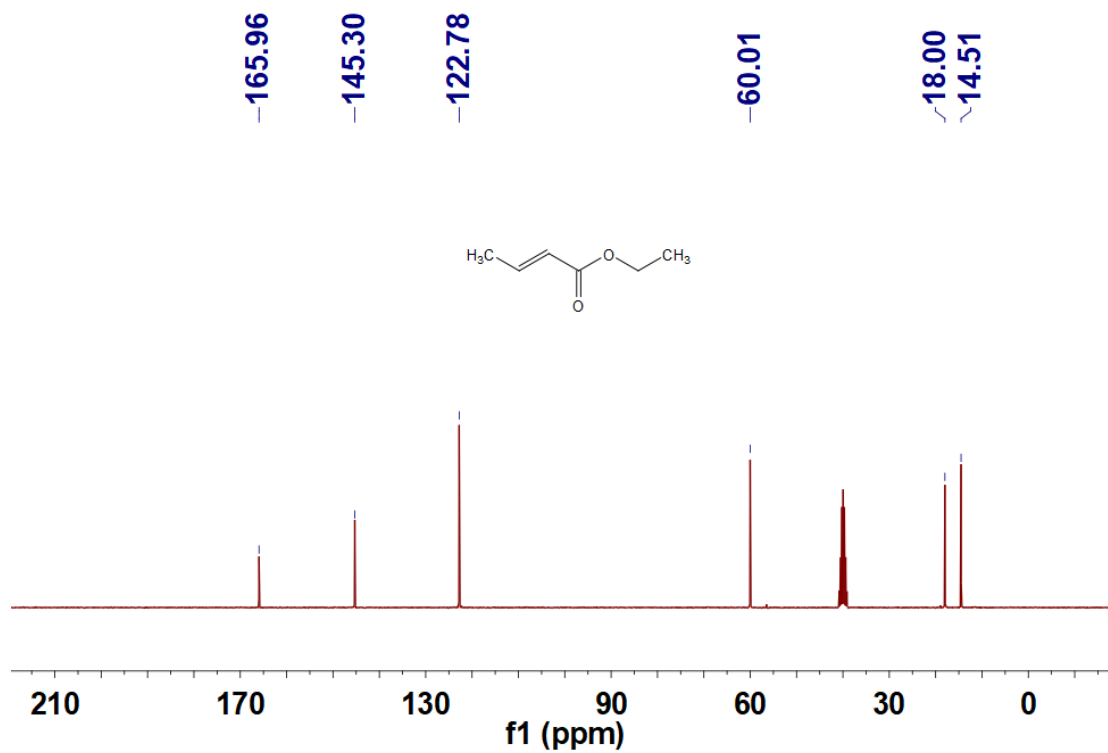

(2E)-N-Benzylbut-2-enamide (3p)

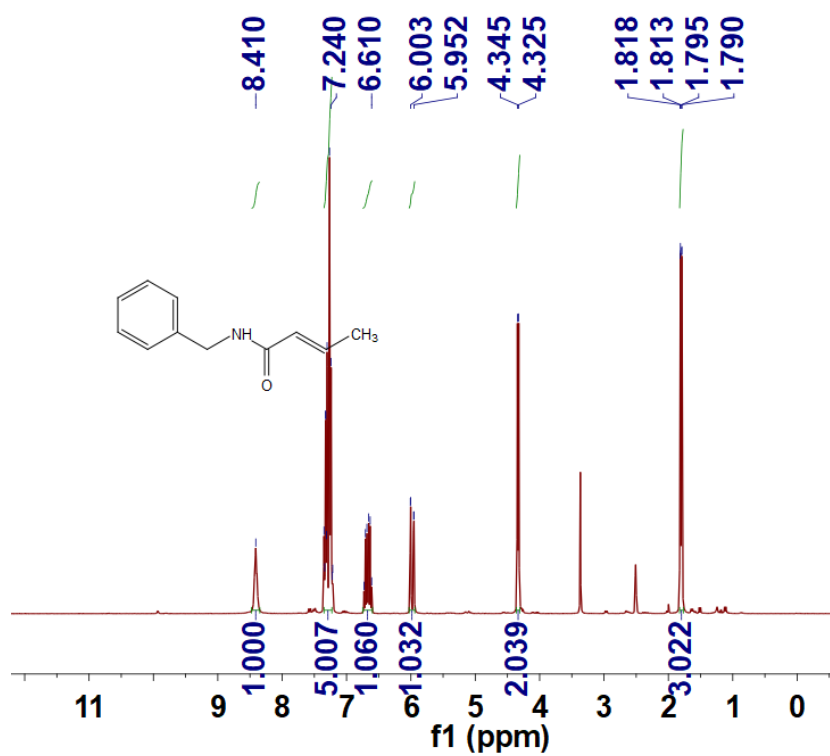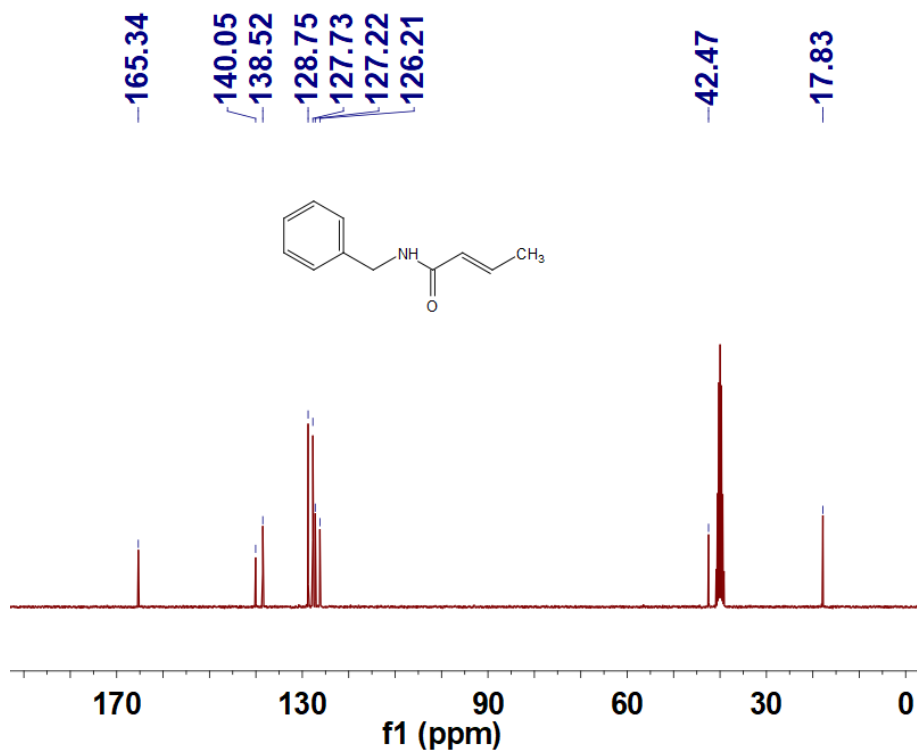

4-Methyl-1,3,4,5-tetrahydro-2H-1,5-benzodiazepin-2-one (3q)

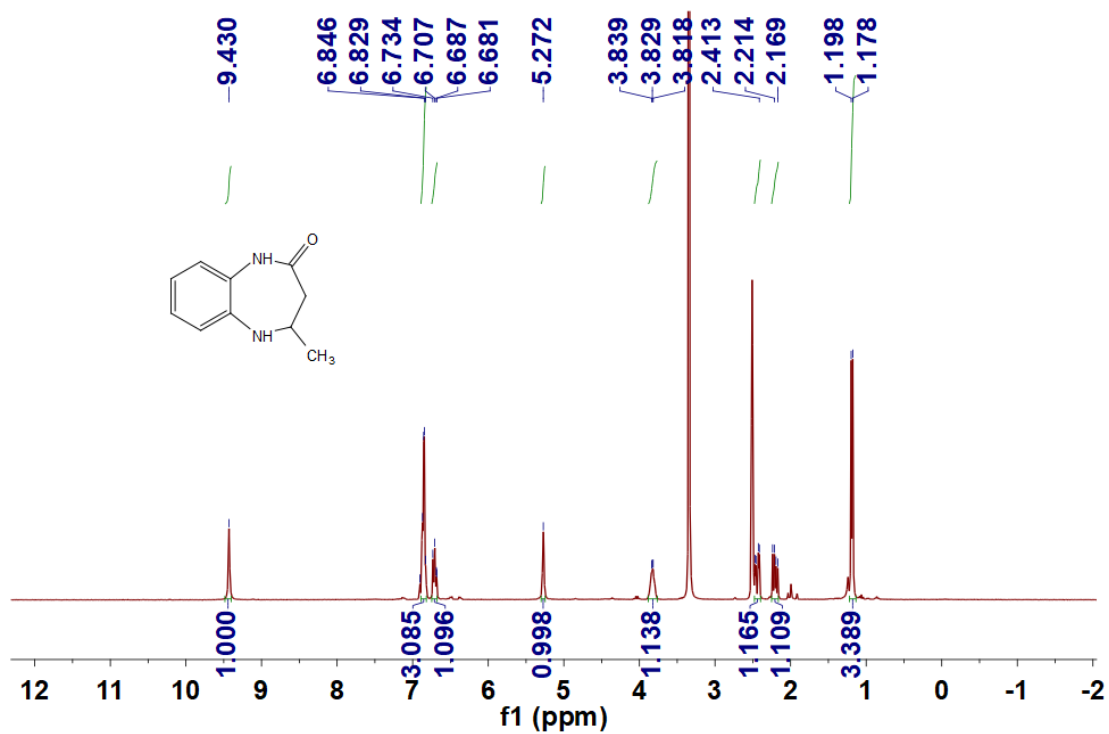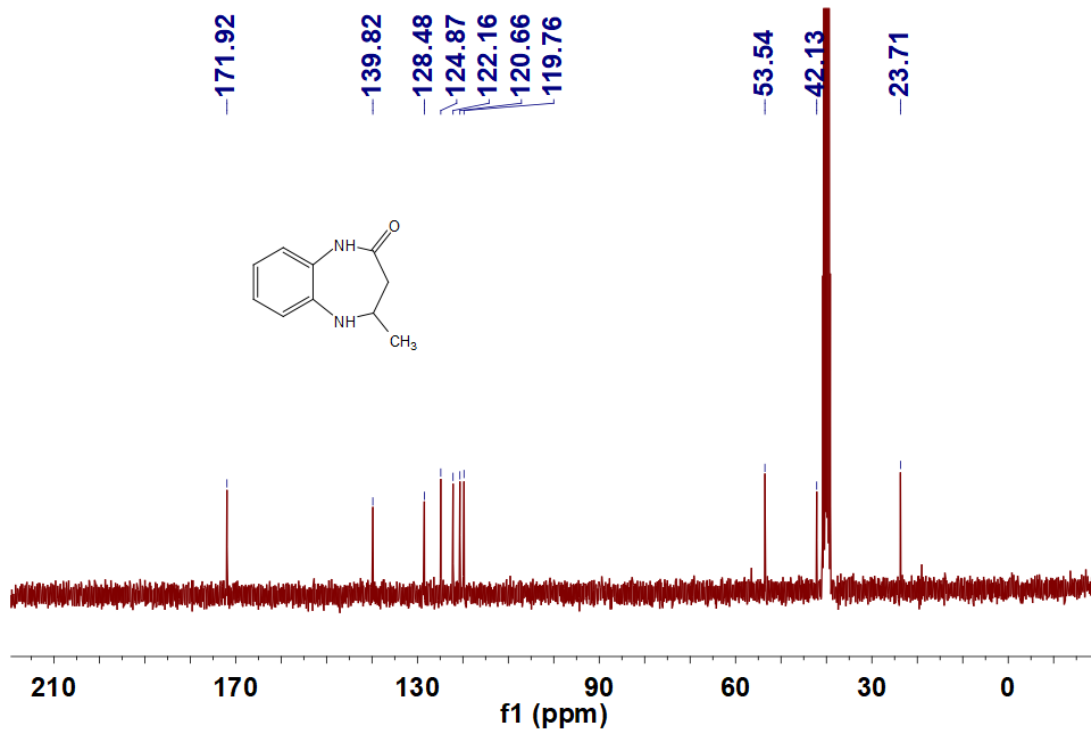

7-Fluoro-4-methyl-1,3,4,5-tetrahydro-2H-benzo[b][1,4]diazepin-2-one (3r)

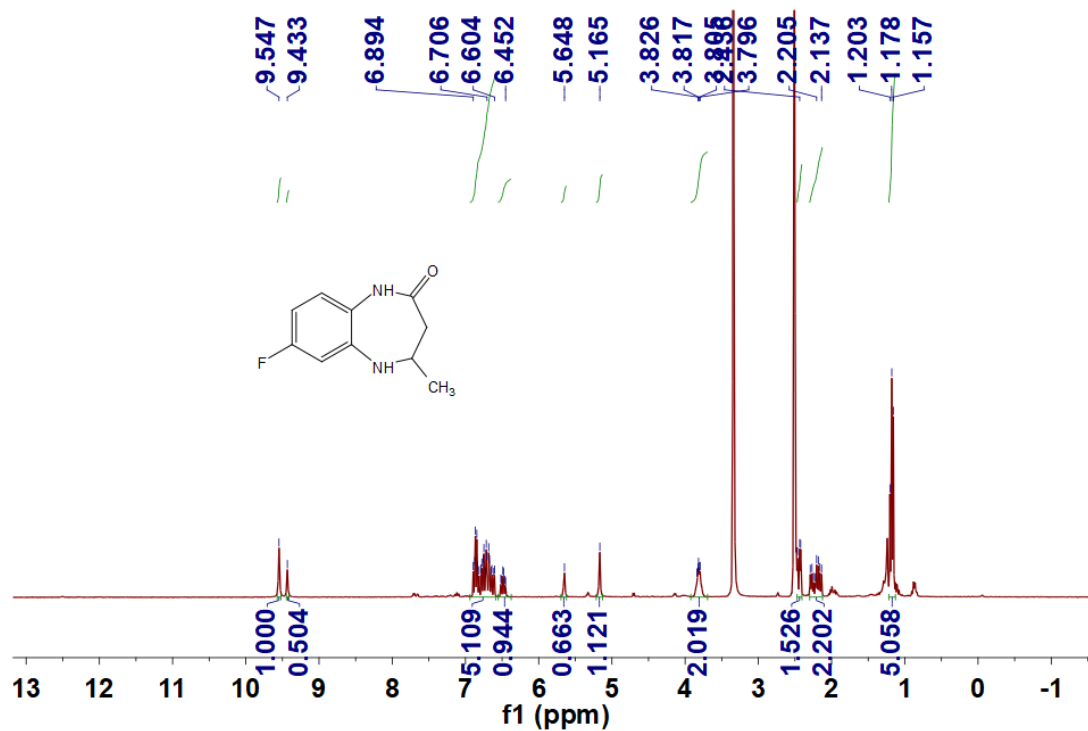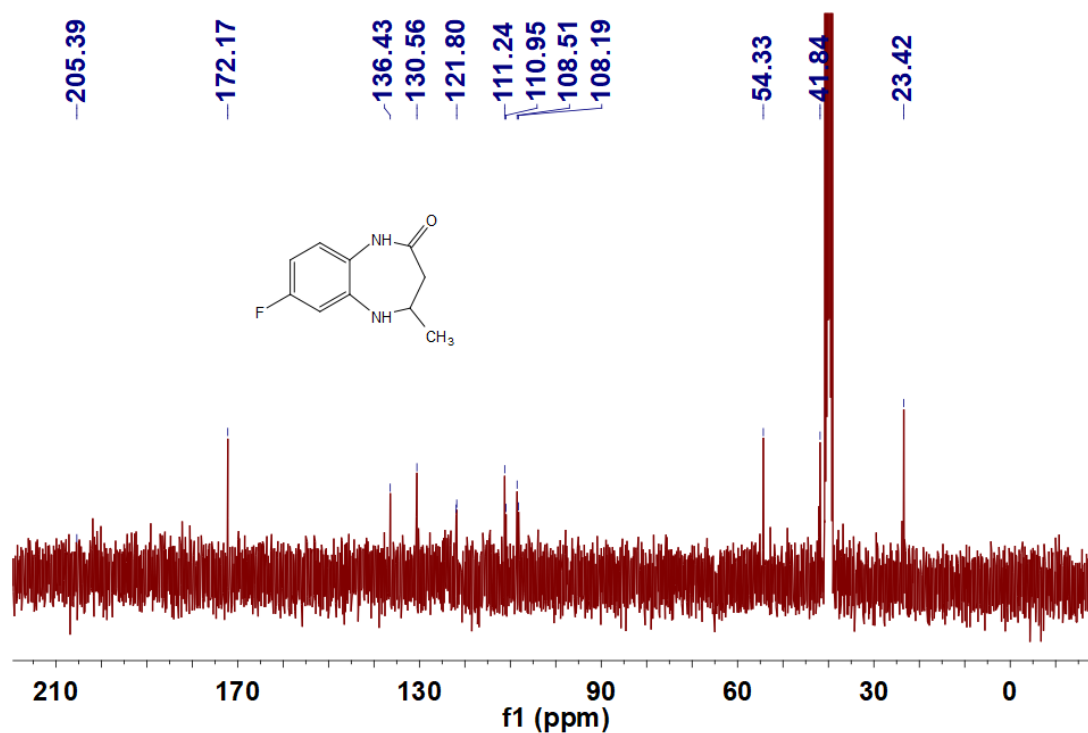

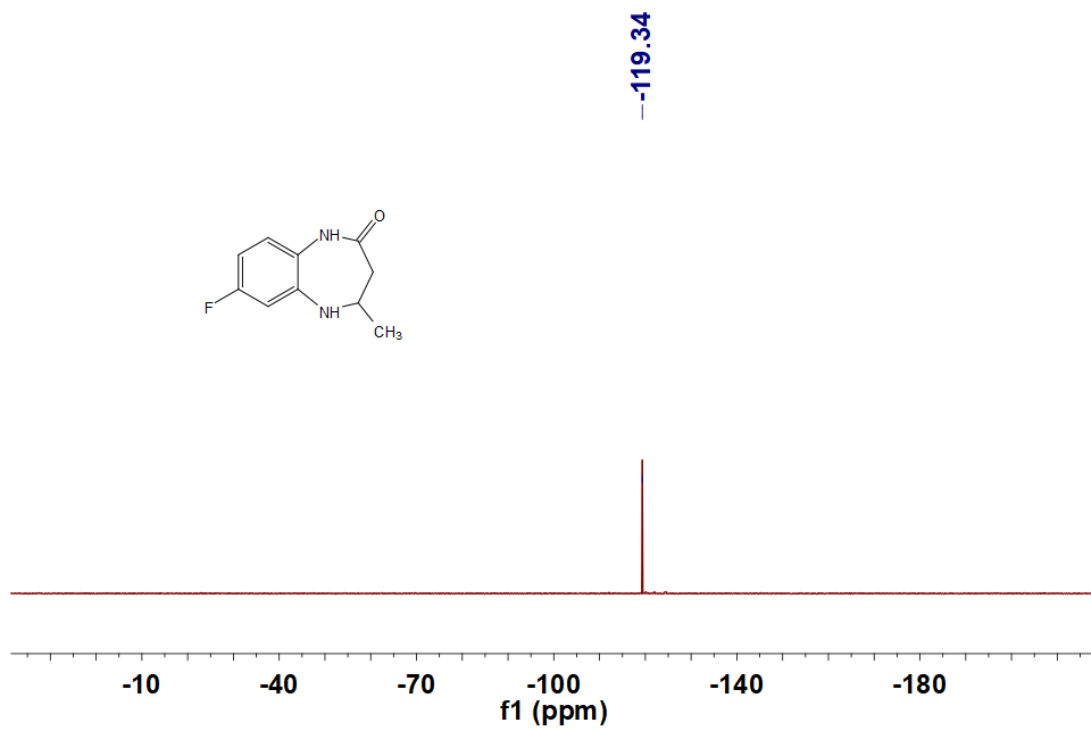

7-Chloro-4-methyl-1,3,4,5-tetrahydro-2H-benzo[b][1,4]diazepin-2-one (3s)

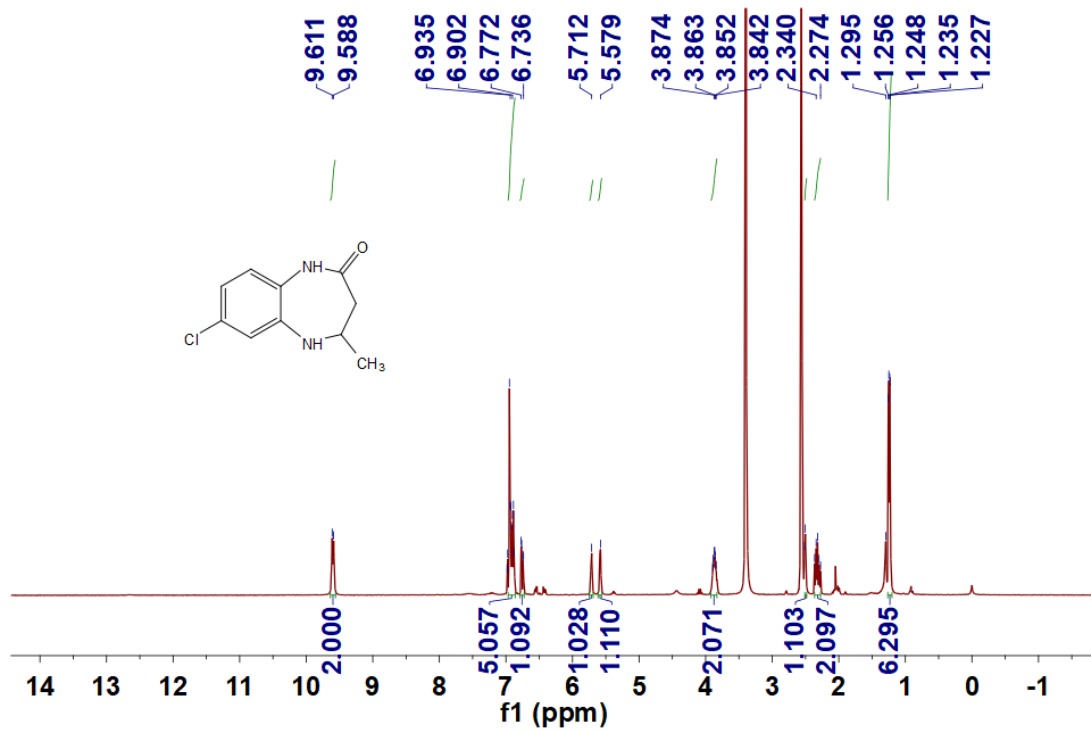

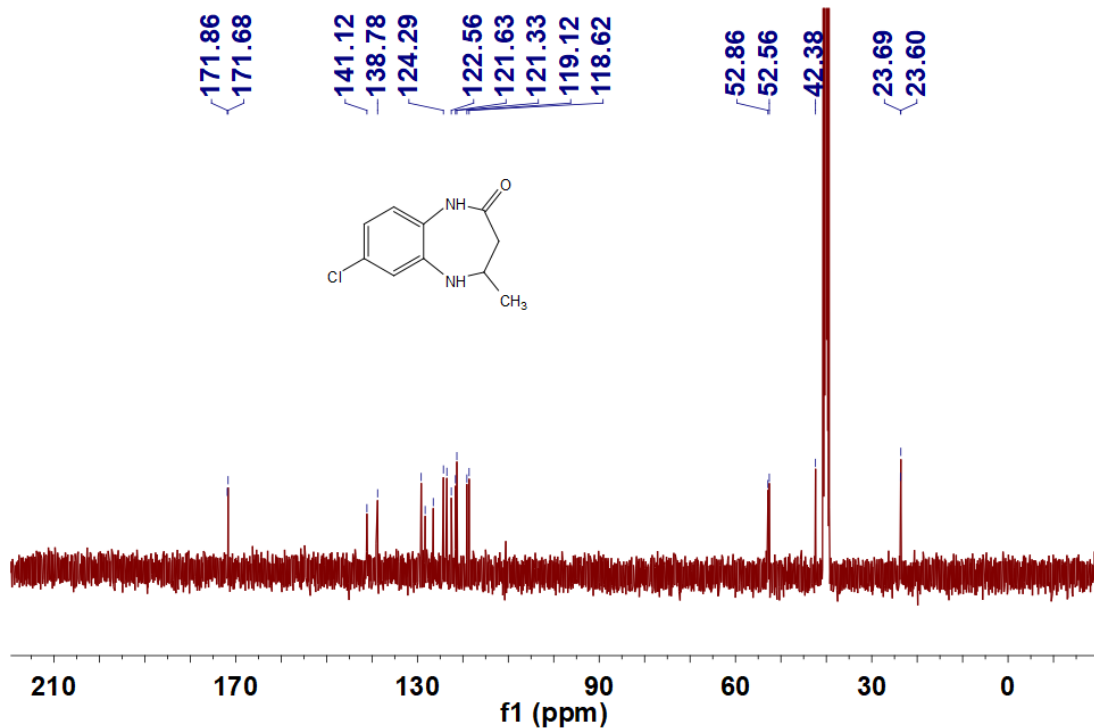

7-Bromo-4-methyl-1,3,4,5-tetrahydro-2H-benzo[b][1,4]diazepin-2-one (3t)

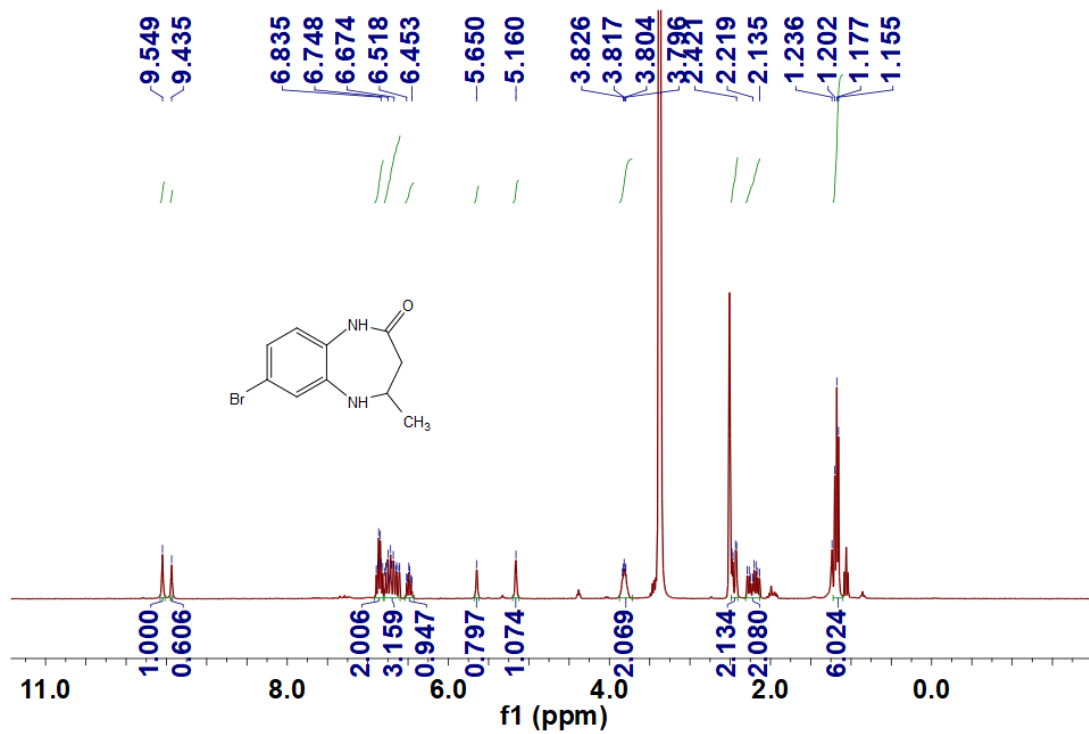

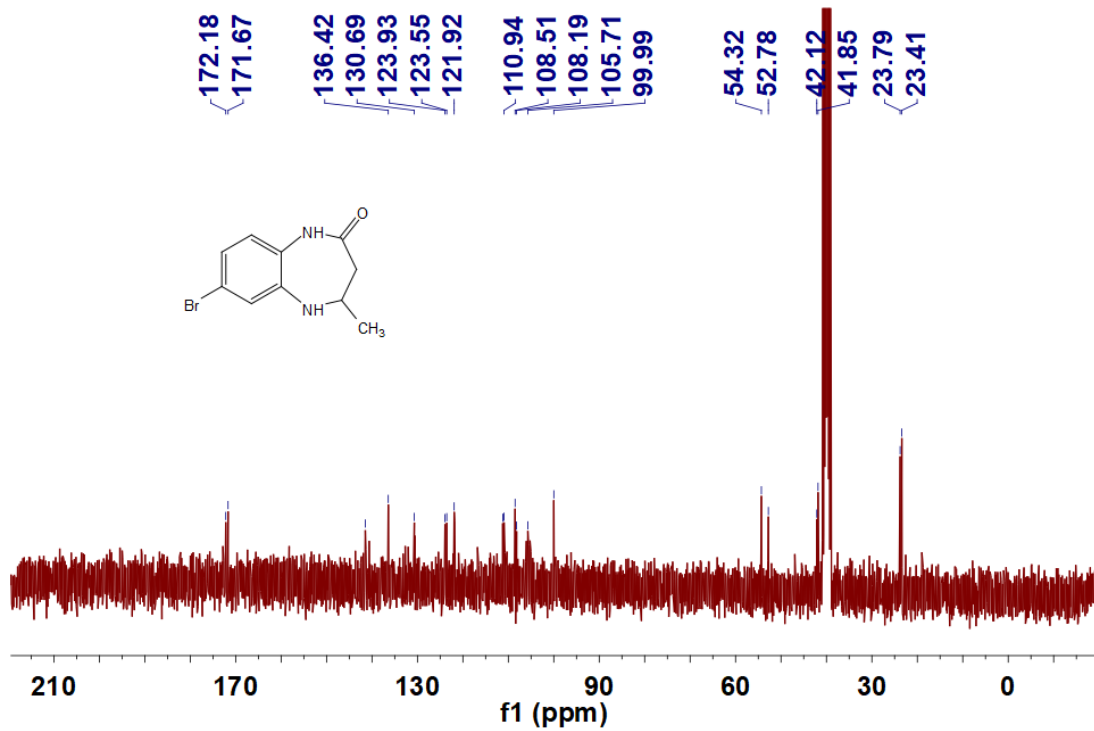

4,7-Dimethyl-1,3,4,5-tetrahydro-2H-benzo[b][1,4]diazepin-2-one (3u)

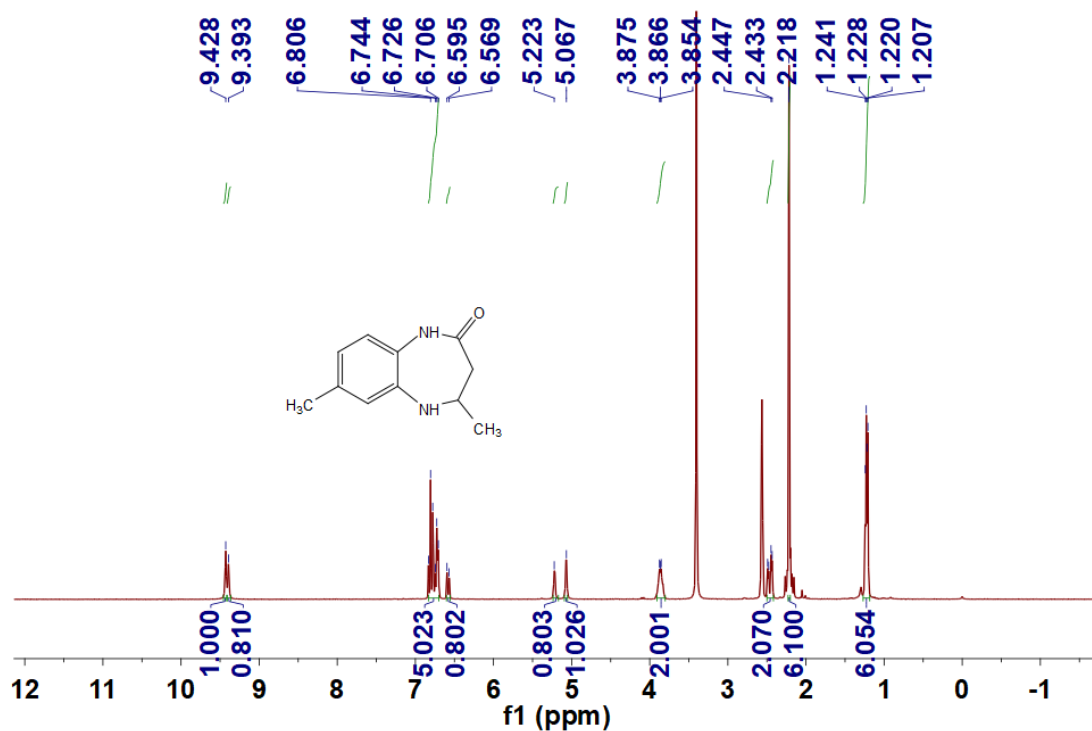



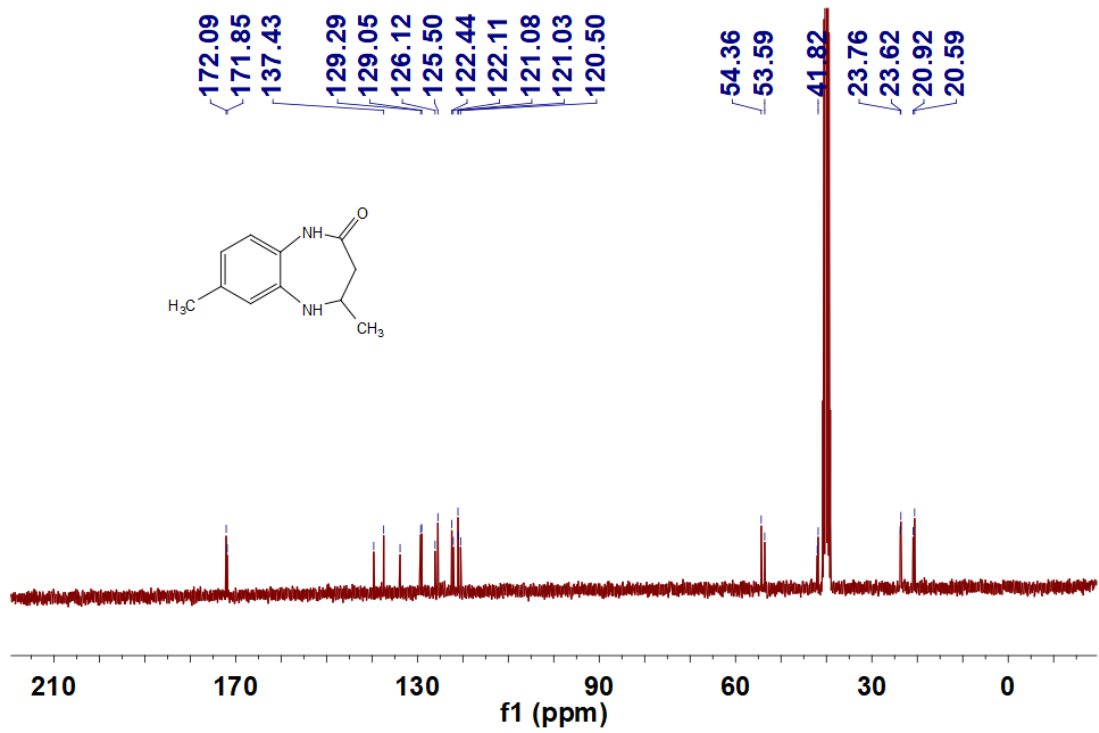

4,7,8-Trimethyl-1,3,4,5-tetrahydro-2H-benzo[b][1,4]diazepin-2-one (3v)

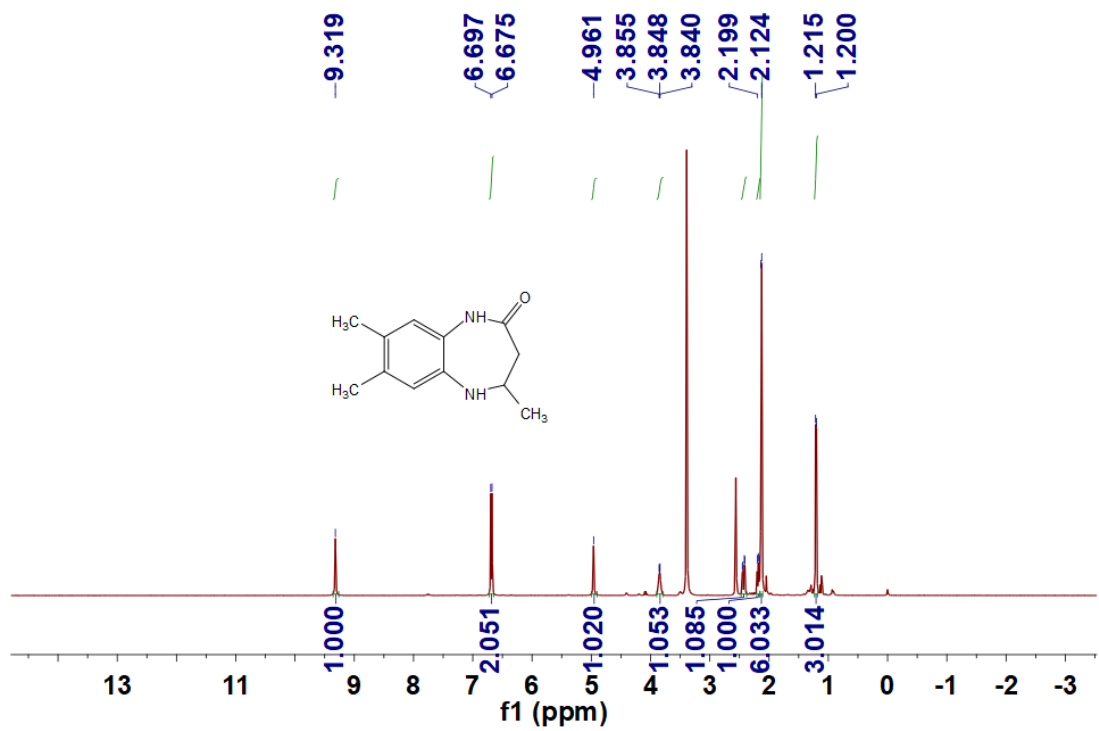

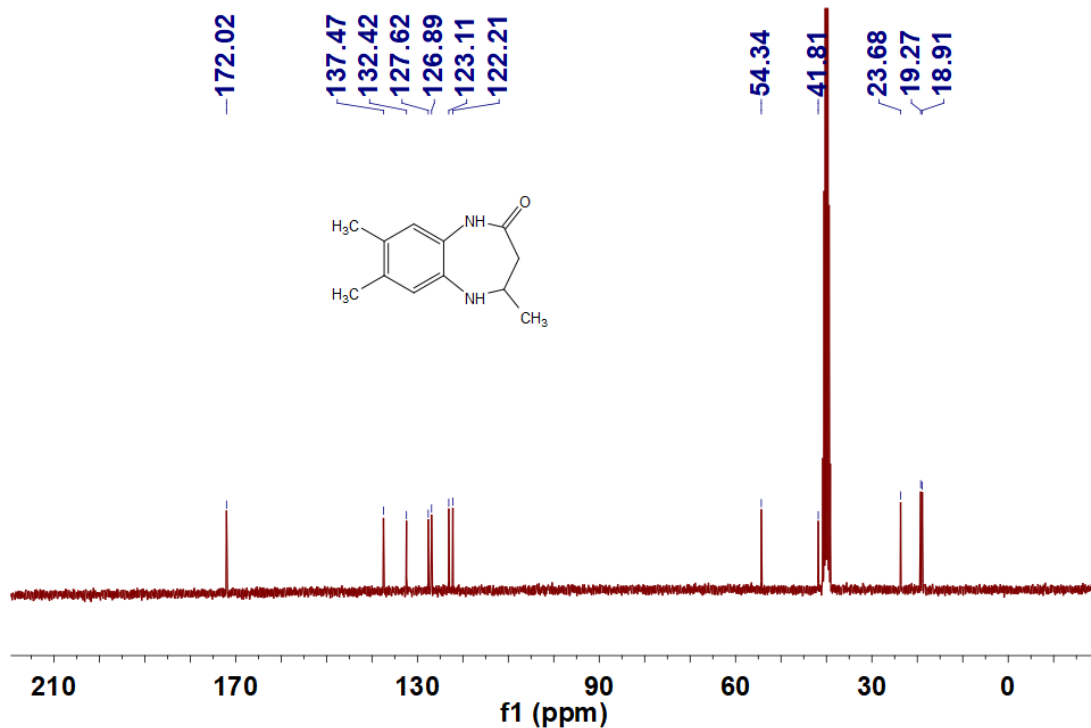

7-Methoxy-4-methyl-1,3,4,5-tetrahydro-2H-benzo[b][1,4]diazepin-2-one (3w)

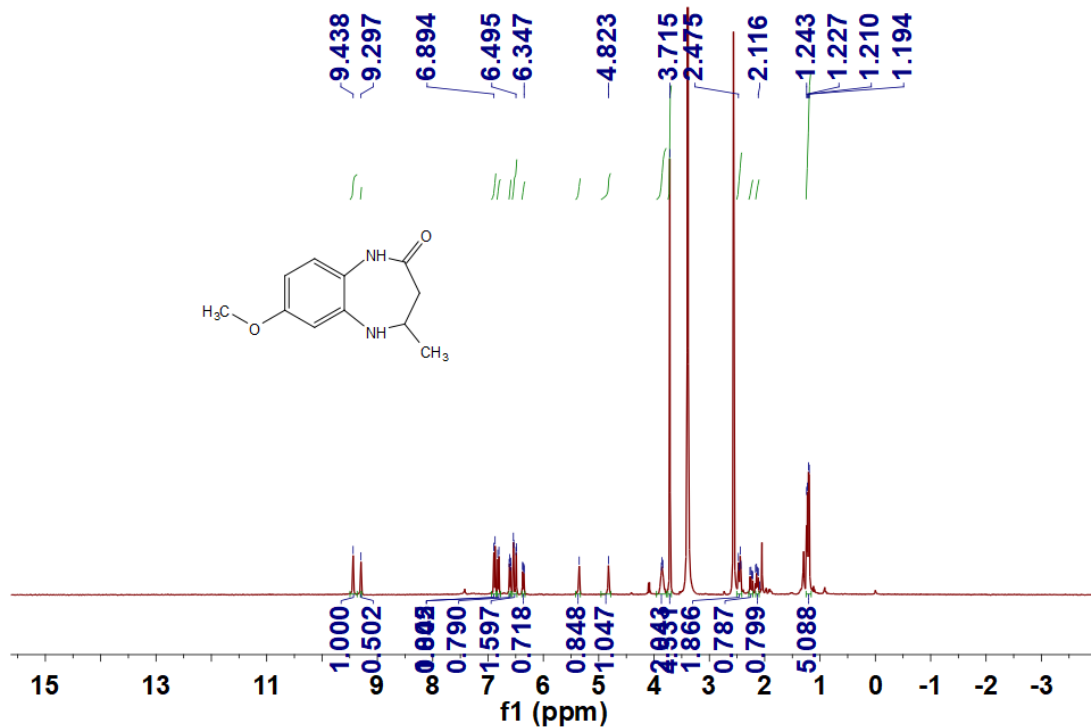

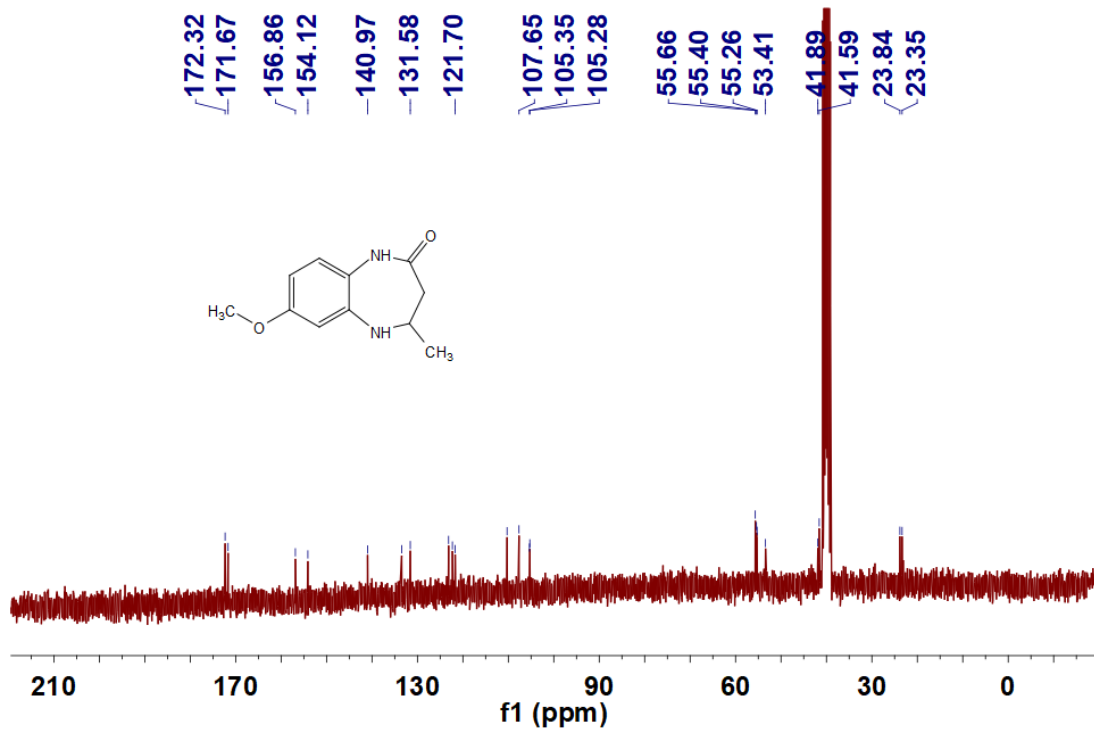

4-Methyl-1,3,4,5-tetrahydro-2H-naphtho[2,3-b][1,4]diazepin-2-one (3x)

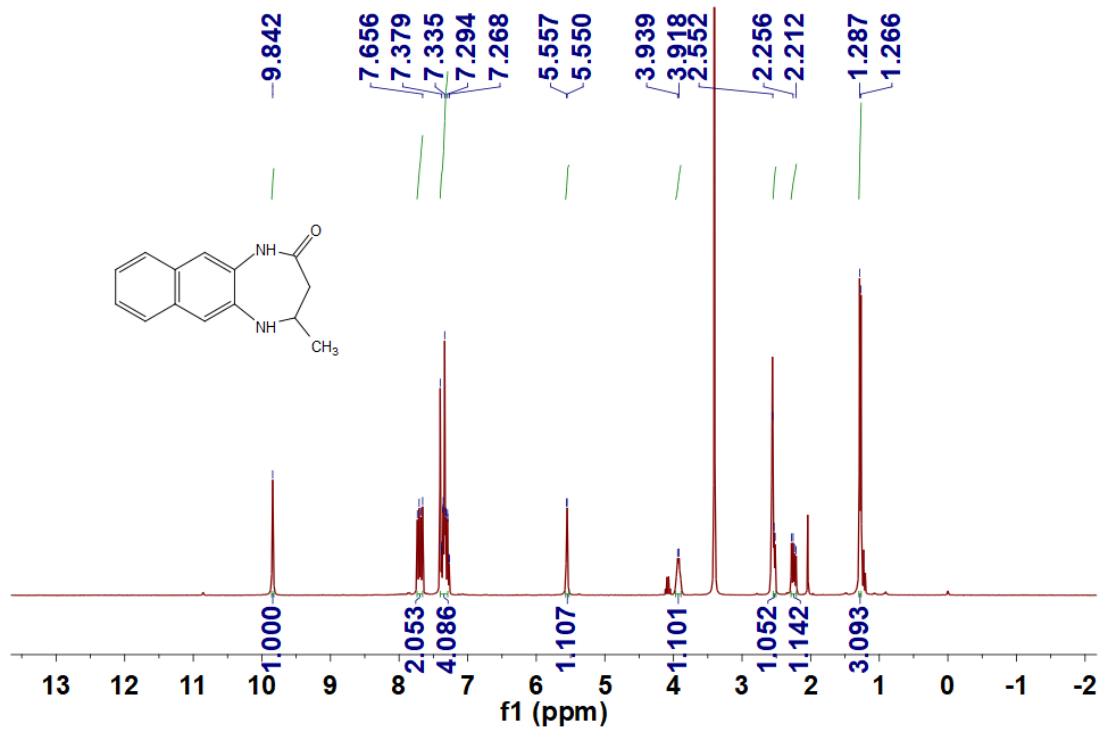

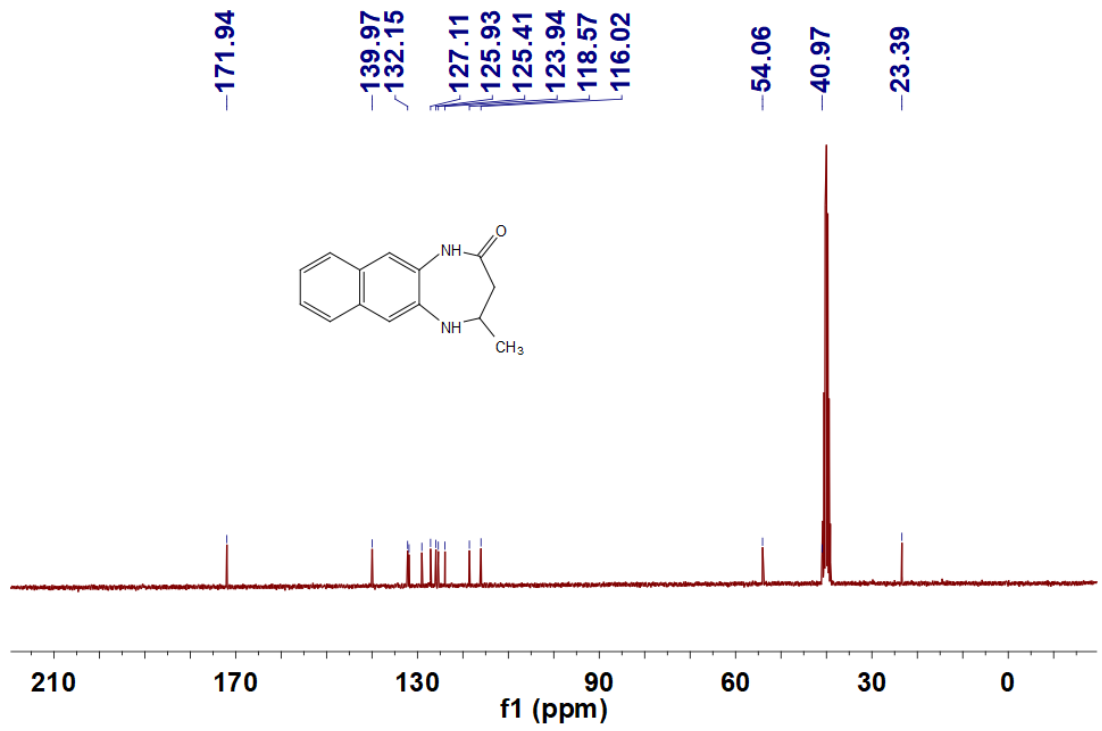

5-Methyl-2-(naphthalen-2-yl)pyrazolidin-3-one (3aa)

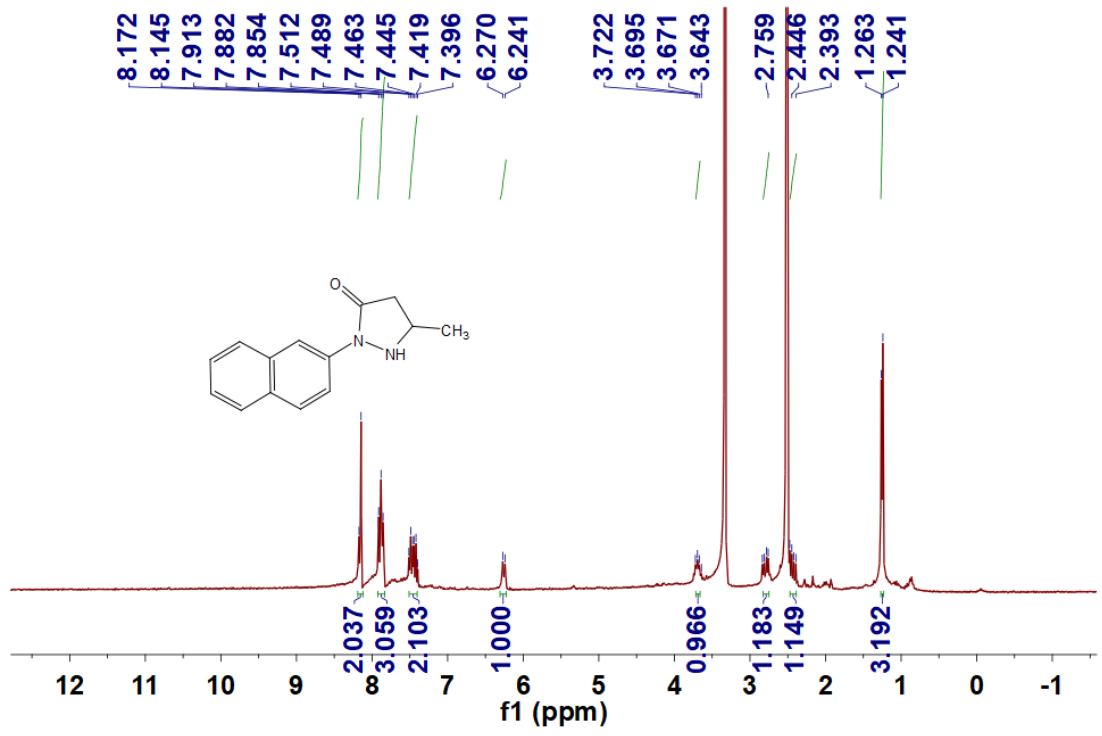

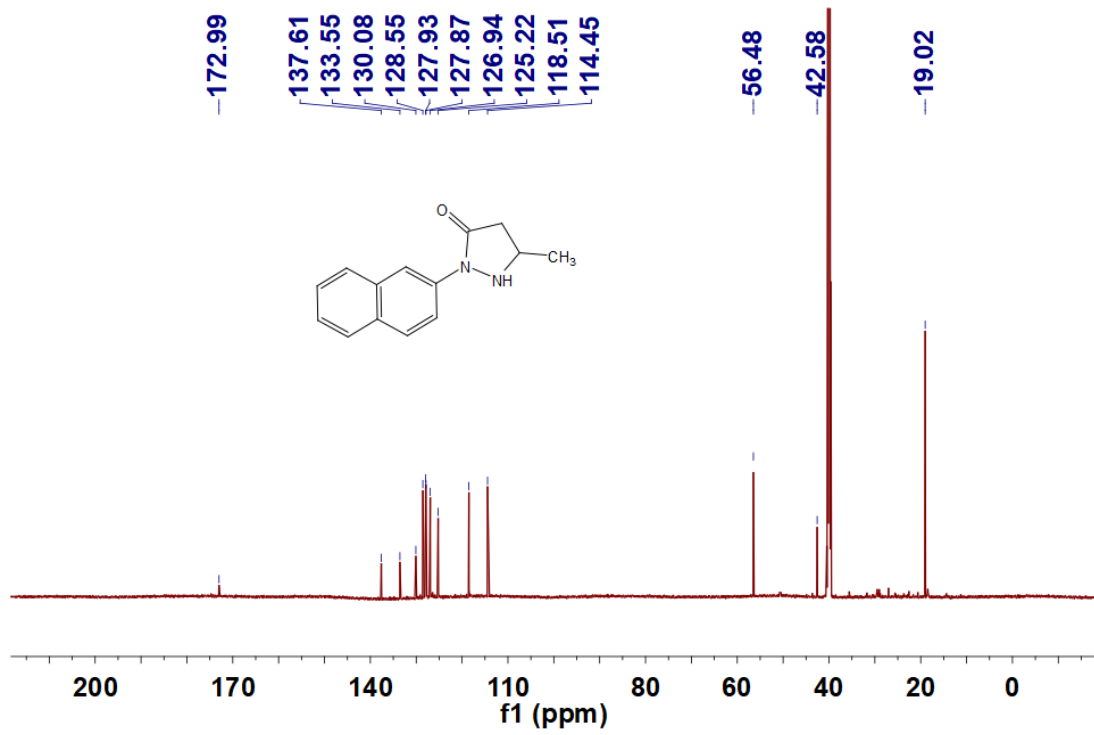

**5-Methylpyrazolidin-3-one (3ab)**

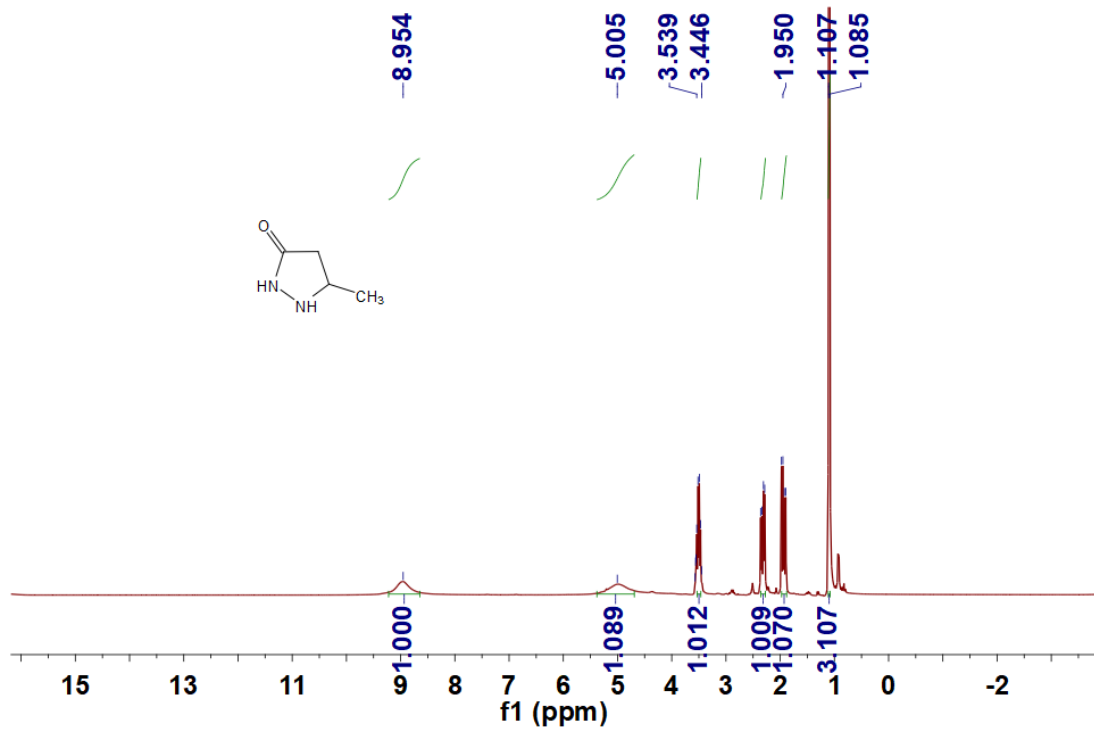

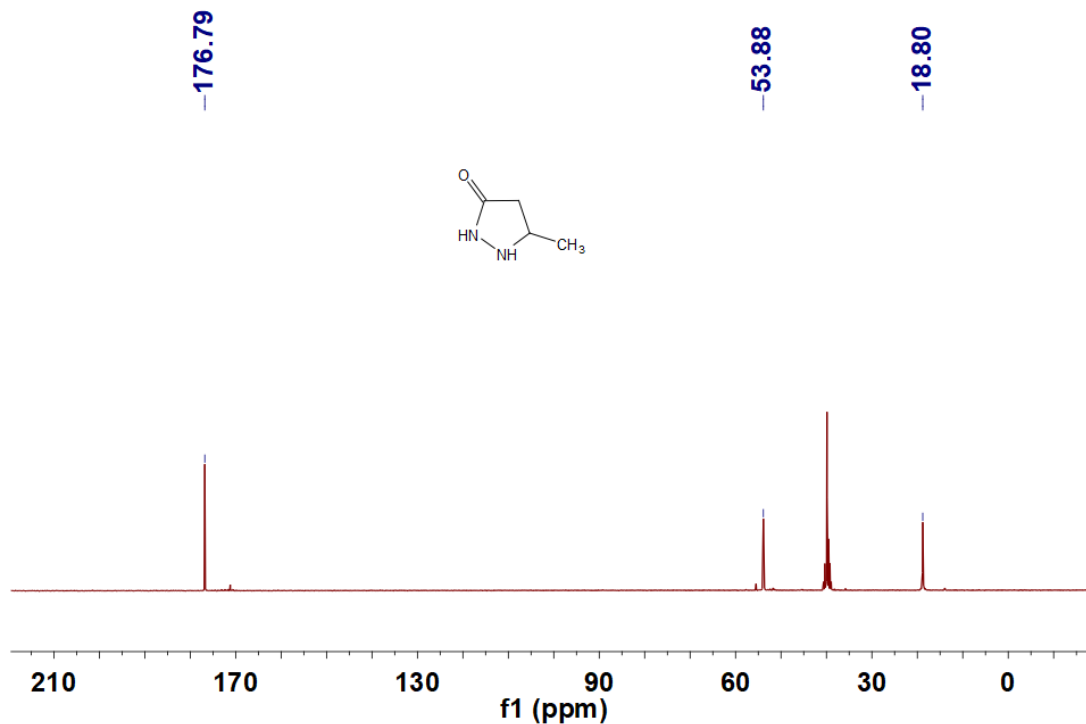

5-Methyl-2-phenylpyrazolidin-3-one (3ac)

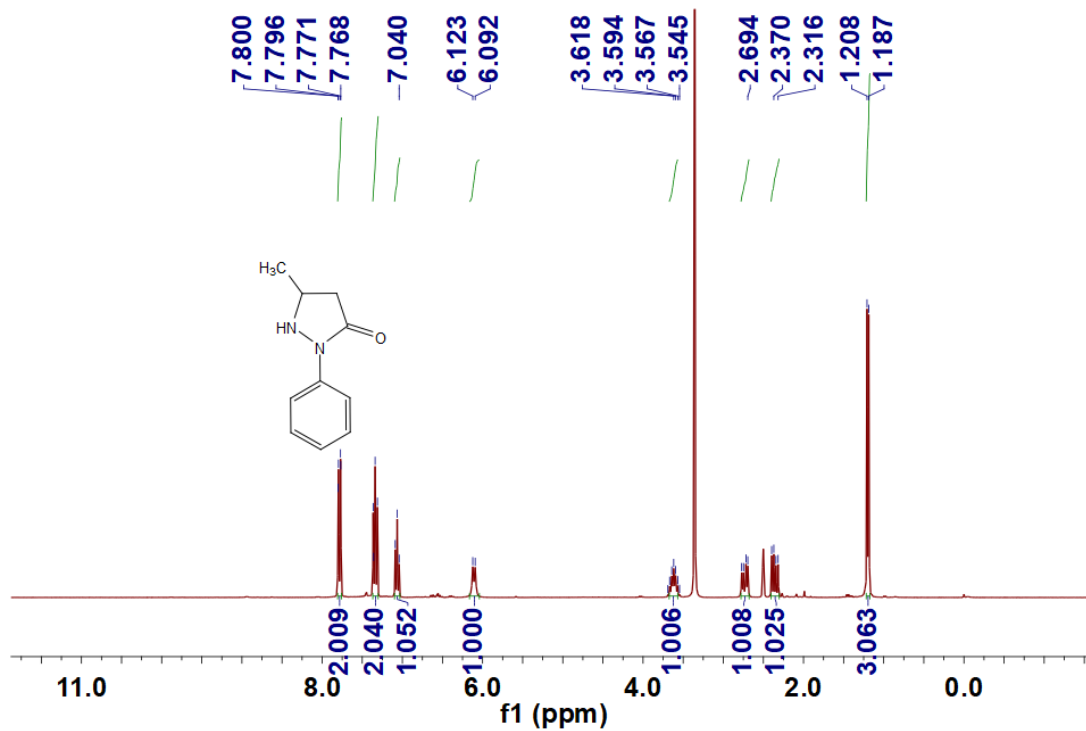

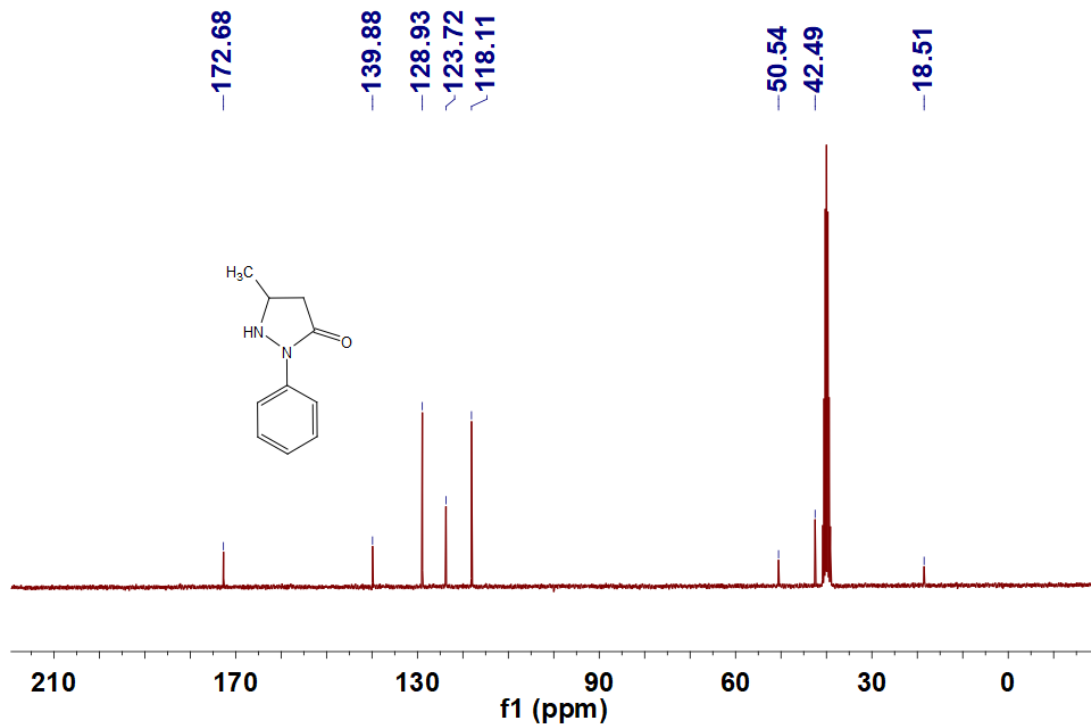

**5-Methyl-2-(*p*-tolyl)pyrazolidin-3-one (3ad)**

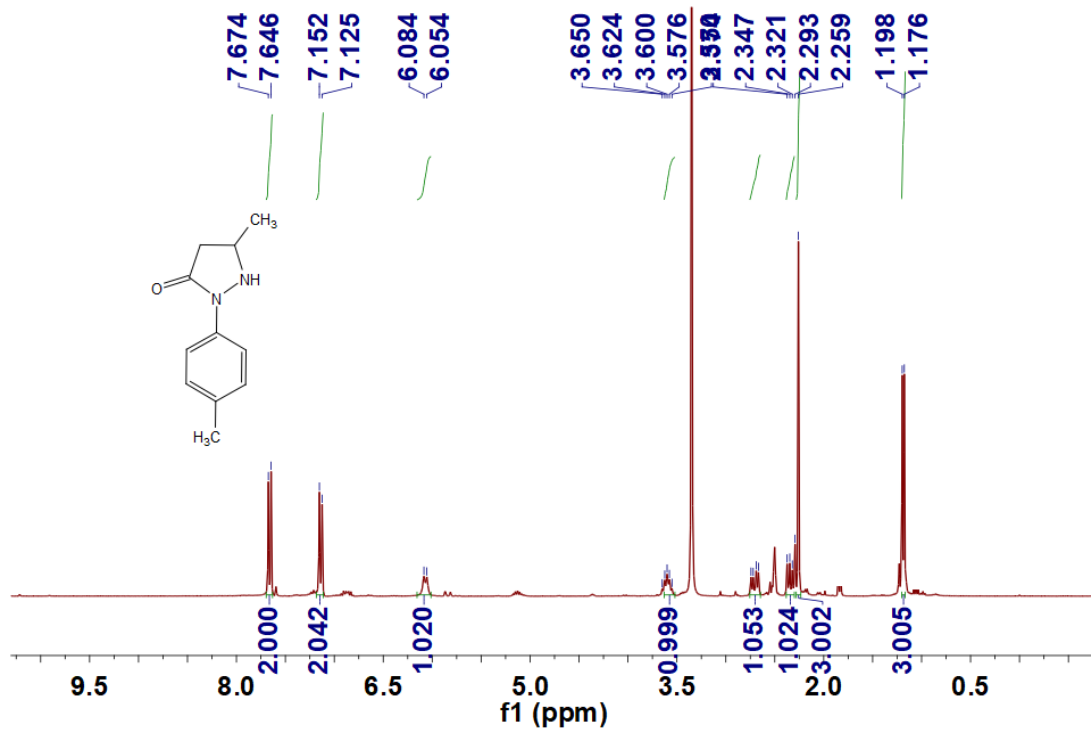

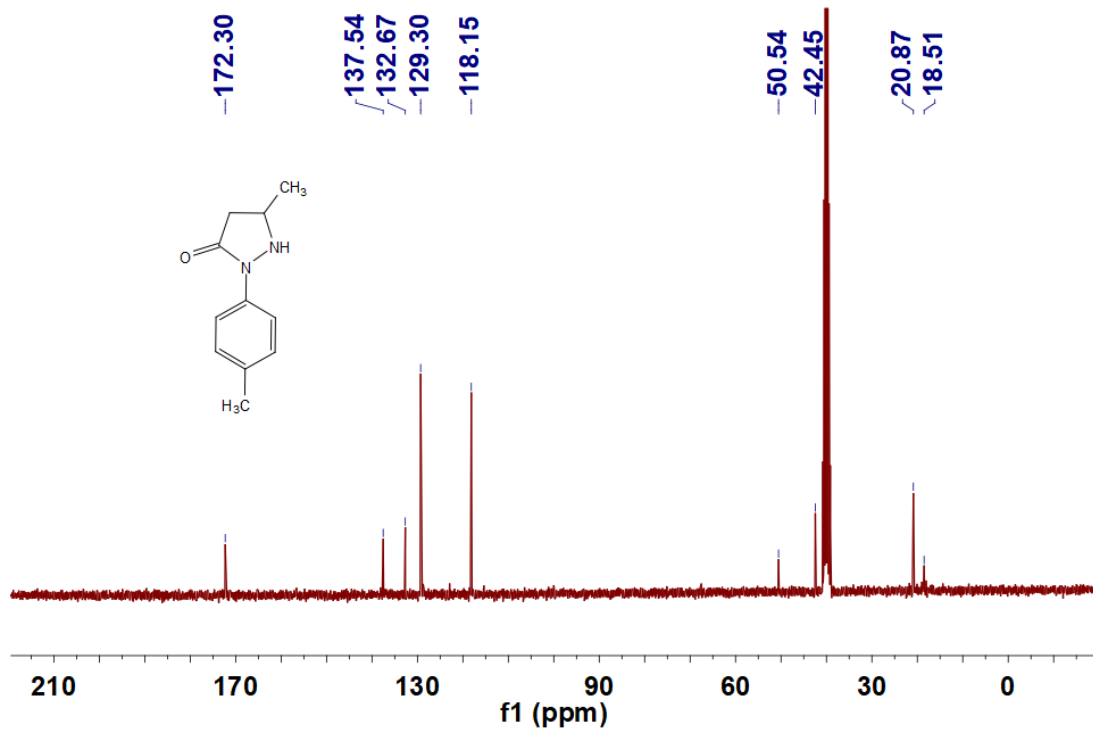

5-Methyl-2-(*m*-tolyl)pyrazolidin-3-one (3ae)

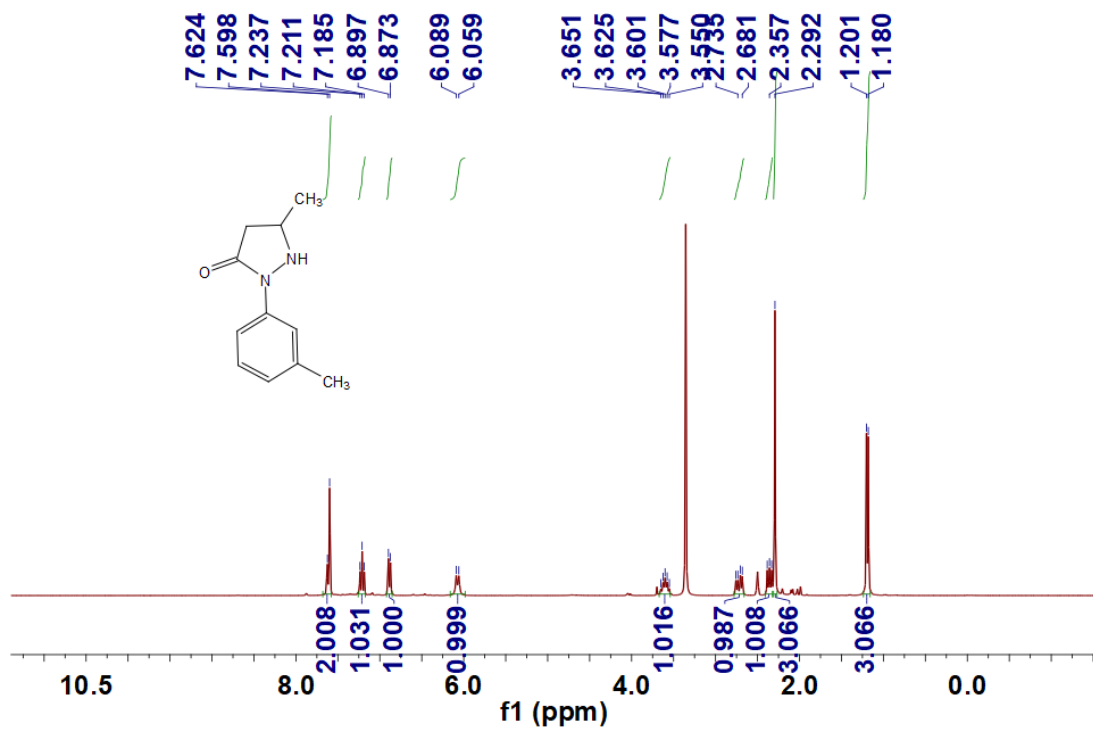



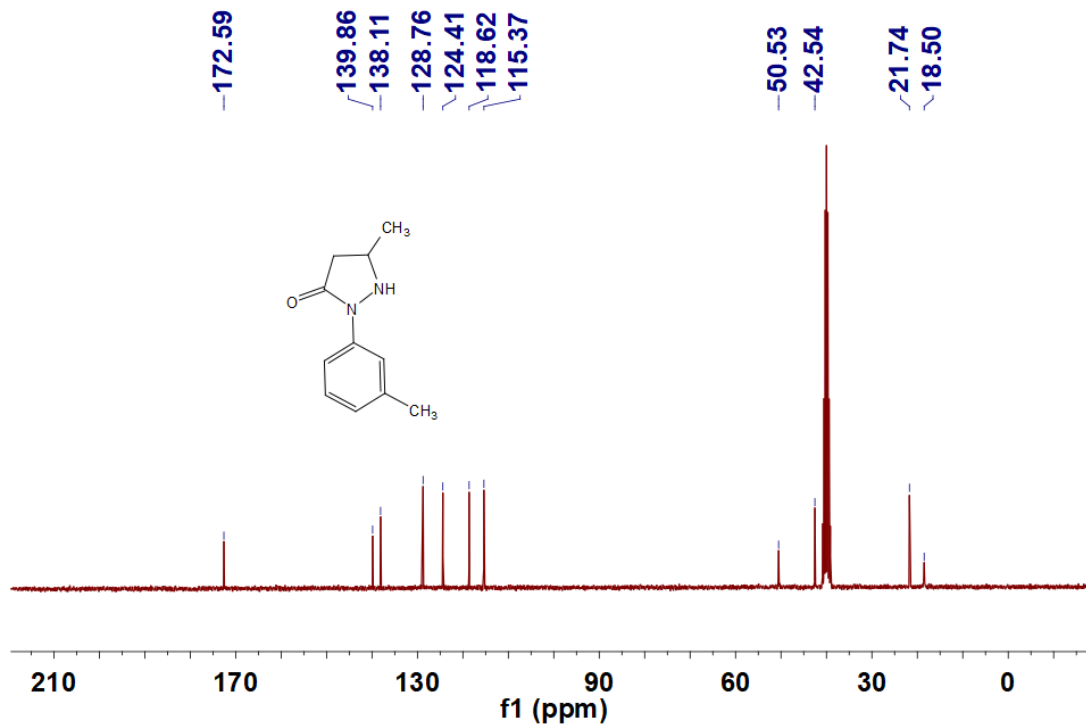

2-(4-Methoxyphenyl)-5-methylpyrazolidin-3-one (3af)

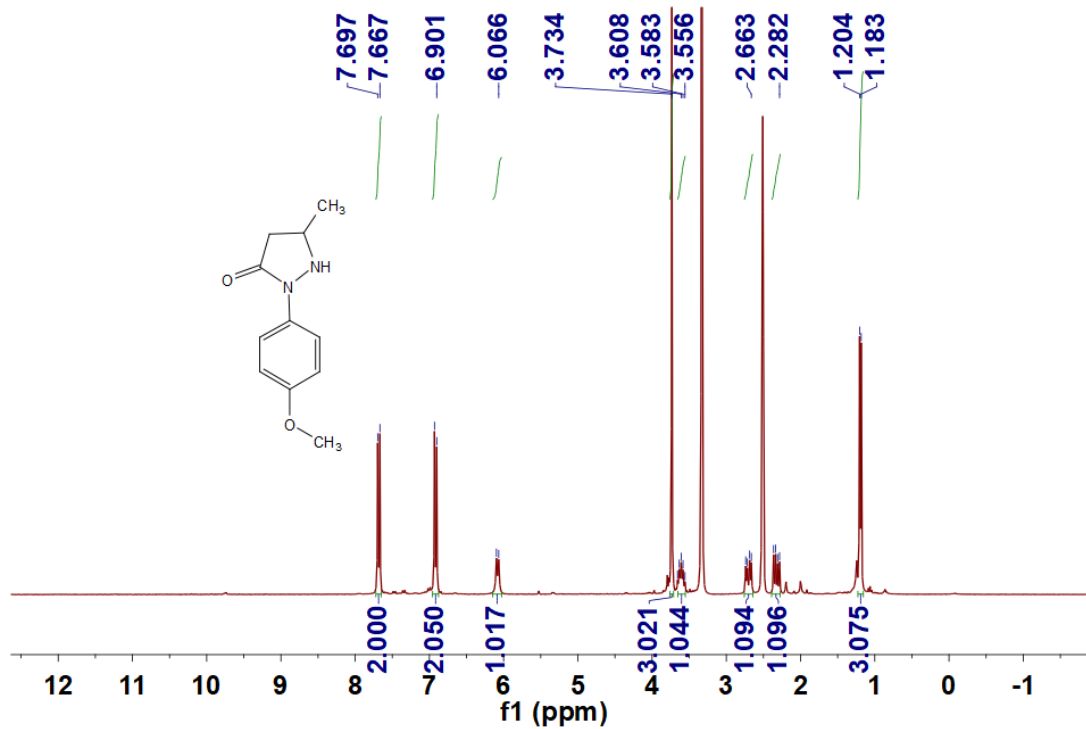

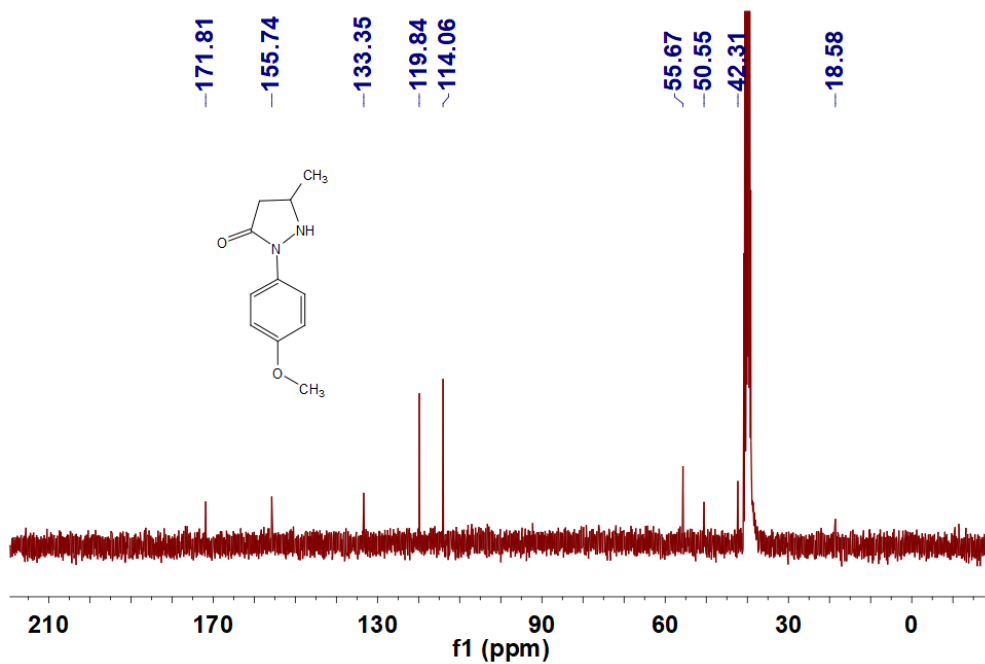

2-(4-Fluorophenyl)-5-methylpyrazolidin-3-one (3ag)

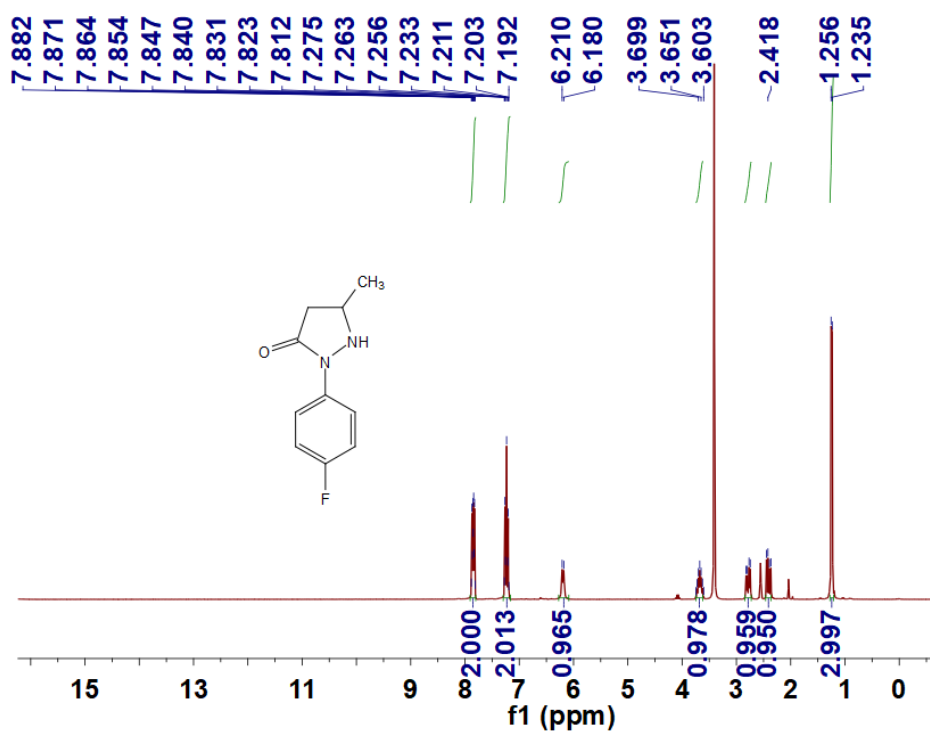

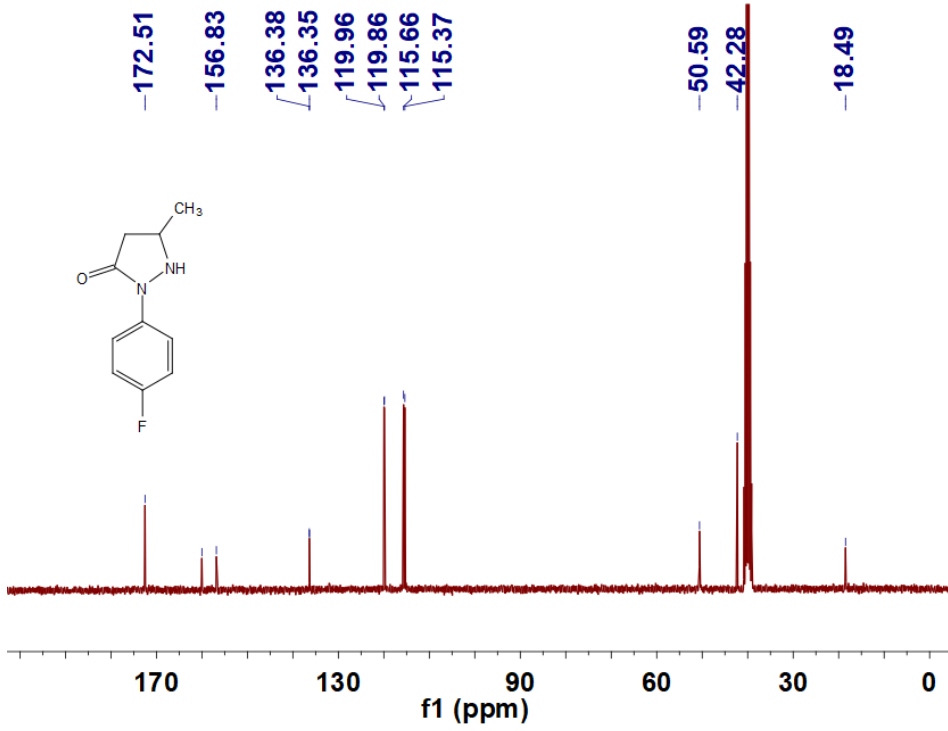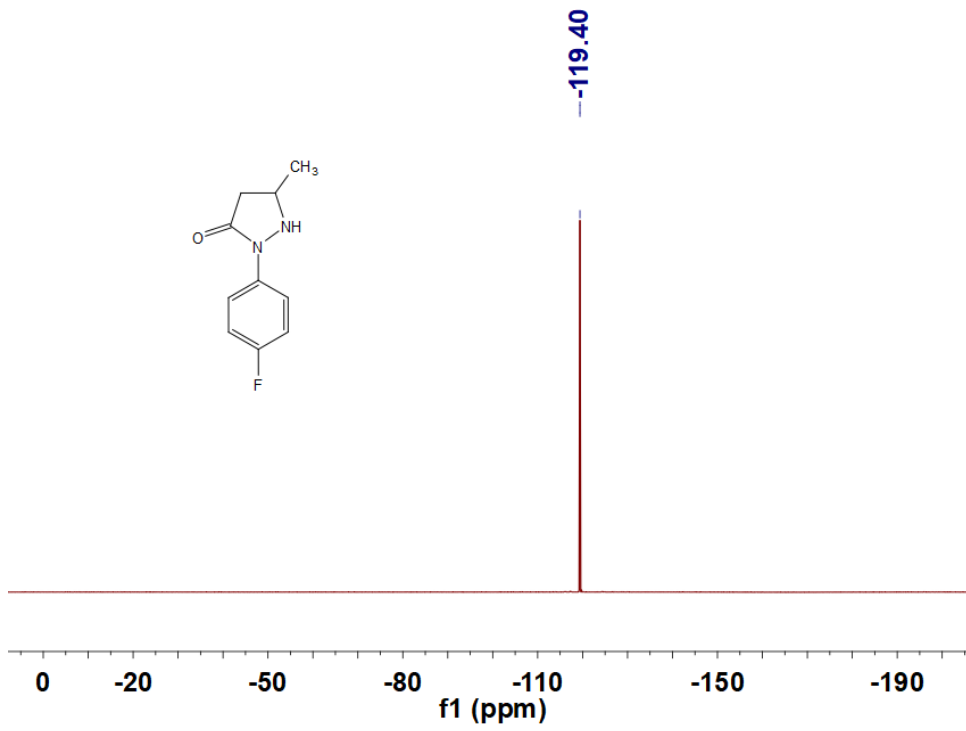

2-(4-Chlorophenyl)-5-methylpyrazolidin-3-one (3ah)

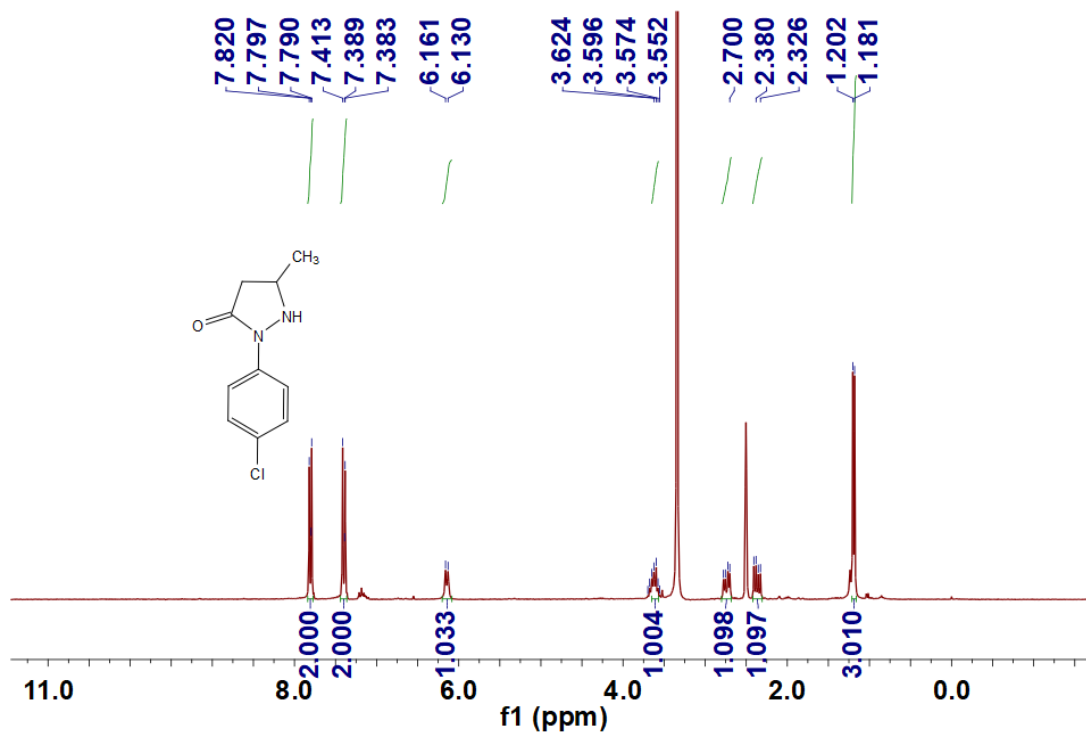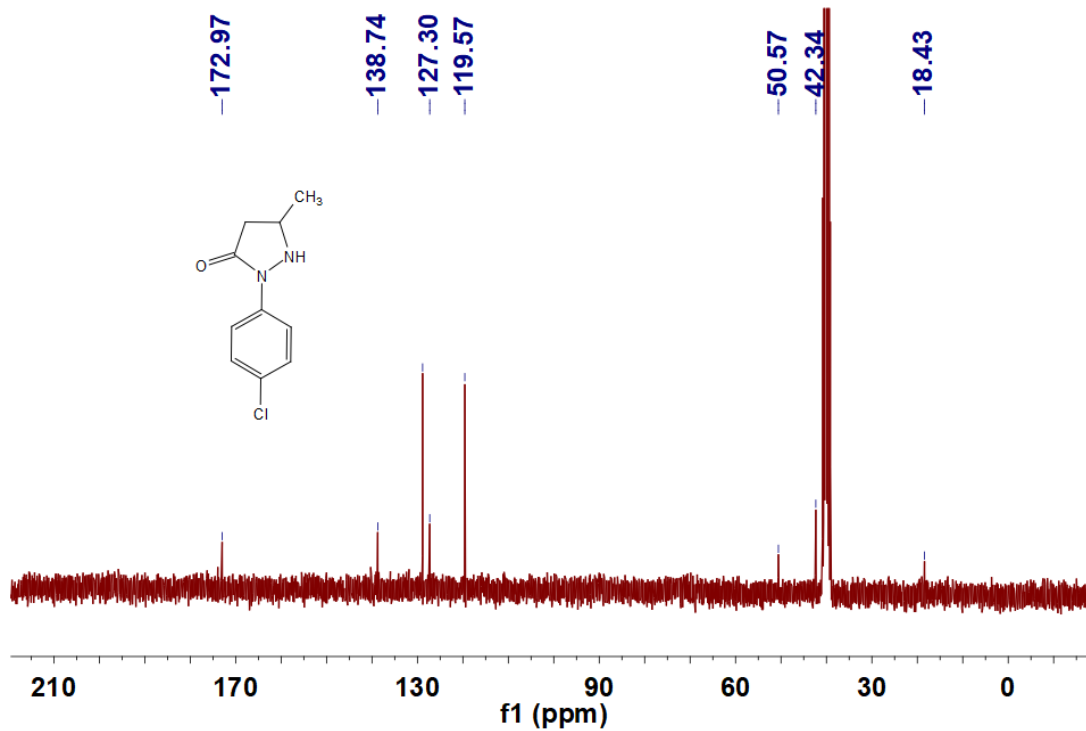

2-(4-Bromophenyl)-5-methylpyrazolidin-3-one (3ai)

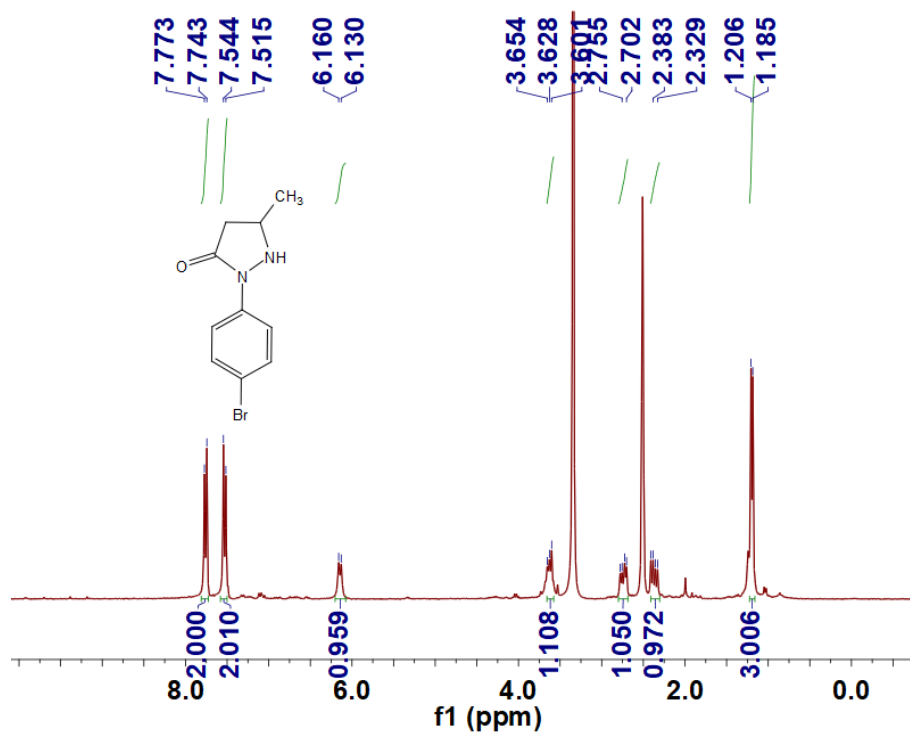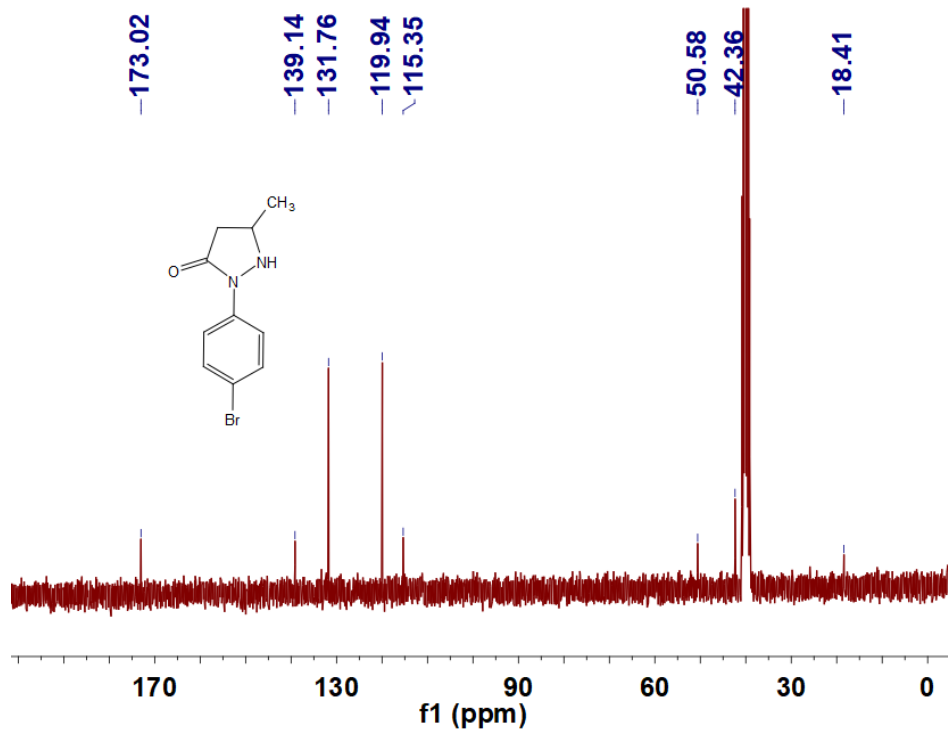

2-(4-Iodophenyl)-5-methylpyrazolidin-3-one (3aj)

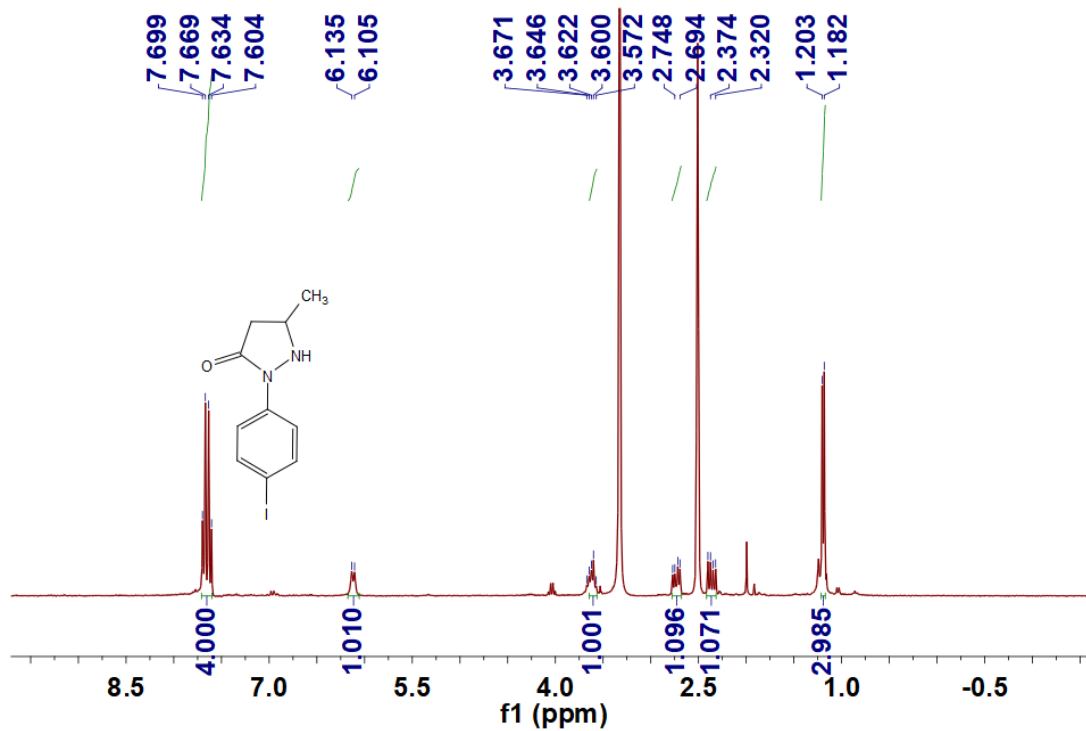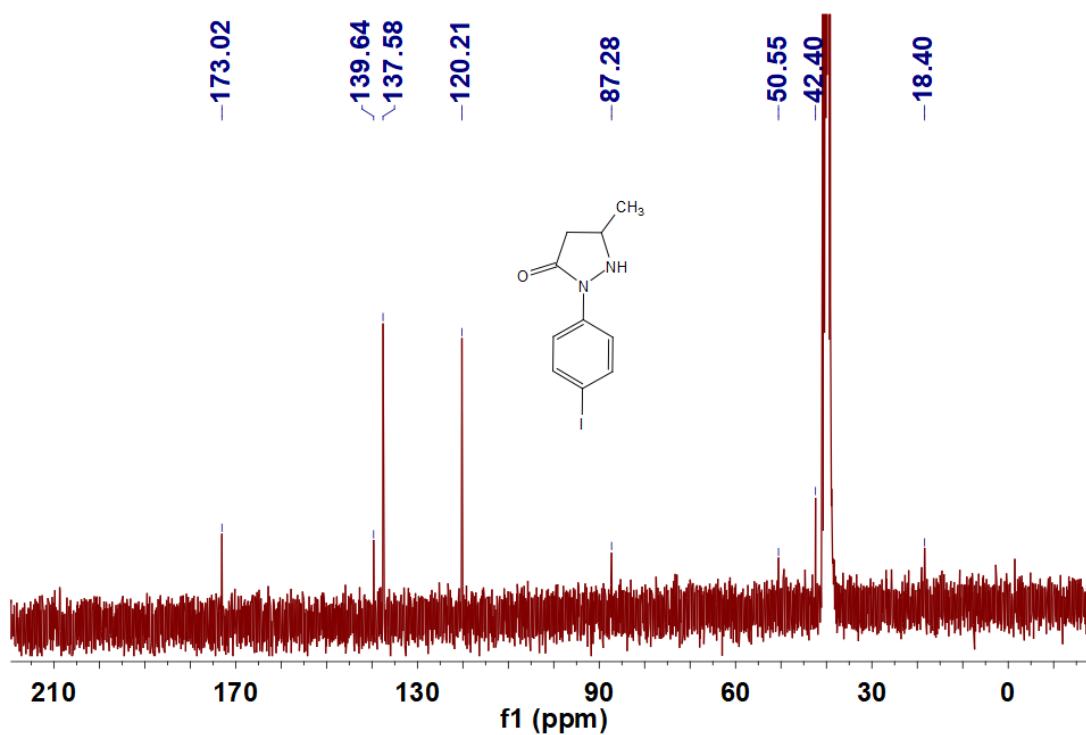

Supplement: d4sc02533d1.pdf [file d4sc02533d1.pdf]
